# Supplementary material
Source: PubMed Central journal article supplement (PMC2775798)
Supplement: 09_94_Tian_Suppl.pdf [file 09_94_Tian_Suppl.pdf]

**Supplemental Table 1. European Ancestry Informative Markers<sup>A</sup>**

| rs number  | EUROset1 <sup>B</sup> | EUROset2 | NORTHset1 | NORTHset2 <sup>C</sup> | SOUTH | NS | Chr | BP        |
|------------|-----------------------|----------|-----------|------------------------|-------|----|-----|-----------|
| rs10000869 | 1                     | 1        |           |                        | 1     |    | 4   | 186576443 |
| rs1000321  | 1                     | 1        | 1         | 1                      |       |    | 19  | 59738299  |
| rs10004939 | 1                     | 1        |           |                        | 1     |    | 4   | 126868469 |
| rs10008492 | 1                     | 1        | 1         | 1                      | 1     |    | 4   | 38442115  |
| rs10010346 | 1                     | 1        |           |                        | 1     |    | 4   | 91987138  |
| rs1001262  | 1                     | 1        |           |                        | 1     |    | 5   | 179740232 |
| rs10016081 | 1                     | 1        | 1         | 1                      |       |    | 4   | 88859088  |
| rs10016411 | 1                     | 1        | 1         | 1                      |       |    | 4   | 4613817   |
| rs10017875 | 1                     | 1        | 1         | 1                      |       |    | 4   | 33916424  |
| rs1001935  | 1                     | 1        | 1         | 1                      | 1     |    | 5   | 75075936  |
| rs10020480 | 1                     | 1        | 1         | 1                      |       |    | 4   | 34795406  |
| rs10032784 | 1                     | 1        | 1         | 1                      | 1     |    | 4   | 190505753 |
| rs1003549  | 1                     | 1        | 1         | 1                      | 1     |    | 7   | 35262016  |
| rs1003921  |                       | 1        |           | 1                      |       |    | 11  | 17756912  |
| rs10045343 | 1                     | 1        | 1         | 1                      |       |    | 5   | 111274626 |
| rs1004644  |                       | 1        |           | 1                      |       |    | 3   | 29266052  |
| rs10047997 | 1                     | 1        | 1         | 1                      |       |    | 15  | 22657843  |
| rs10061271 | 1                     | 1        | 1         | 1                      |       |    | 5   | 104196324 |
| rs10063082 | 1                     | 1        | 1         | 1                      |       |    | 5   | 24264954  |
| rs10068809 |                       | 1        |           | 1                      |       |    | 5   | 58456103  |
| rs10068902 | 1                     | 1        | 1         | 1                      |       |    | 5   | 133129405 |
| rs1007018  | 1                     | 1        | 1         | 1                      |       |    | 11  | 132454683 |
| rs1007042  | 1                     | 1        | 1         | 1                      |       |    | 10  | 70286979  |
| rs10077241 | 1                     | 1        | 1         | 1                      |       |    | 5   | 85451555  |
| rs10083961 | 1                     | 1        | 1         | 1                      |       |    | 18  | 60317371  |
| rs1008461  | 1                     | 1        | 1         | 1                      |       |    | 6   | 13326528  |
| rs1008645  | 1                     | 1        | 1         | 1                      |       |    | 2   | 125873717 |
| rs1009473  | 1                     | 1        | 1         | 1                      | 1     |    | 9   | 137917133 |
| rs10095717 | 1                     | 1        | 1         | 1                      |       |    | 8   | 101940358 |
| rs1009638  |                       | 1        |           | 1                      |       |    | 11  | 3134640   |
| rs10097270 | 1                     | 1        | 1         | 1                      |       |    | 8   | 29284160  |
| rs1009728  | 1                     | 1        | 1         | 1                      |       |    | 17  | 35862733  |
| rs10100409 | 1                     | 1        |           |                        | 1     |    | 8   | 29138884  |
| rs1010656  | 1                     | 1        | 1         | 1                      |       |    | 3   | 150887016 |
| rs1010779  | 1                     | 1        | 1         | 1                      |       |    | 7   | 68076890  |
| rs10108974 | 1                     | 1        | 1         | 1                      |       |    | 8   | 77588928  |
| rs1010949  |                       | 1        |           | 1                      |       |    | 5   | 71335991  |
| rs10109510 |                       | 1        |           | 1                      |       |    | 8   | 65044623  |
| rs1011088  | 1                     | 1        |           |                        | 1     |    | 6   | 4426420   |
| rs10112398 | 1                     | 1        | 1         | 1                      |       |    | 8   | 93864228  |
| rs1011470  | 1                     | 1        |           |                        | 1     |    | 2   | 171167244 |
| rs10118378 | 1                     | 1        | 1         | 1                      |       |    | 9   | 108463023 |
| rs1012769  | 1                     | 1        | 1         | 1                      |       |    | 22  | 26306203  |
| rs10128640 | 1                     | 1        | 1         | 1                      |       |    | 11  | 89726601  |
| rs10132    | 1                     | 1        | 1         | 1                      |       |    | 17  | 53523370  |
| rs10132585 | 1                     | 1        |           |                        | 1     |    | 14  | 22399286  |
| rs10138962 | 1                     | 1        |           |                        | 1     |    | 14  | 104066938 |
| rs1014136  |                       | 1        |           | 1                      |       |    | 7   | 38195632  |
| rs10143058 | 1                     | 1        | 1         | 1                      |       |    | 14  | 56904596  |
| rs10143977 | 1                     | 1        | 1         | 1                      |       |    | 14  | 95796636  |

|            |   |   |   |   |   |    |           |
|------------|---|---|---|---|---|----|-----------|
| rs10148024 | 1 | 1 | 1 | 1 |   | 14 | 28729886  |
| rs10152962 | 1 | 1 | 1 | 1 |   | 15 | 92112175  |
| rs10154899 | 1 | 1 | 1 | 1 |   | 3  | 105245144 |
| rs10155062 |   | 1 |   | 1 |   | 4  | 7184806   |
| rs10158939 | 1 | 1 | 1 | 1 |   | 1  | 240289966 |
| rs10159191 | 1 | 1 | 1 | 1 |   | 1  | 189587809 |
| rs1016173  | 1 | 1 | 1 | 1 |   | 21 | 21665674  |
| rs10162946 | 1 | 1 | 1 | 1 |   | 15 | 21689398  |
| rs1016315  |   | 1 |   | 1 |   | 10 | 131742295 |
| rs10163400 | 1 | 1 | 1 | 1 |   | 16 | 6783832   |
| rs10166127 | 1 | 1 | 1 | 1 |   | 2  | 240710414 |
| rs10166397 |   | 1 |   | 1 |   | 2  | 44226413  |
| rs10168477 | 1 | 1 | 1 | 1 |   | 2  | 6247900   |
| rs1017104  | 1 | 1 | 1 | 1 |   | 7  | 89881118  |
| rs10171287 | 1 | 1 | 1 | 1 |   | 2  | 150437699 |
| rs1017366  | 1 | 1 | 1 | 1 |   | 2  | 134001727 |
| rs10174149 | 1 | 1 |   |   | 1 | 2  | 180767679 |
| rs10174187 | 1 | 1 | 1 | 1 |   | 2  | 129917395 |
| rs10175679 | 1 | 1 |   |   | 1 | 2  | 76572272  |
| rs10183349 |   | 1 |   | 1 |   | 2  | 50686339  |
| rs10188692 | 1 | 1 |   |   | 1 | 2  | 190180421 |
| rs10189499 | 1 | 1 | 1 | 1 | 1 | 2  | 203458294 |
| rs10189760 | 1 | 1 | 1 | 1 | 1 | 2  | 223552138 |
| rs10193032 |   | 1 |   | 1 |   | 2  | 73905120  |
| rs10195135 | 1 | 1 | 1 | 1 |   | 2  | 204689162 |
| rs10196343 | 1 | 1 | 1 | 1 |   | 2  | 232512604 |
| rs10197026 | 1 | 1 | 1 | 1 |   | 2  | 53076982  |
| rs1020042  | 1 | 1 | 1 | 1 |   | 3  | 29310050  |
| rs10205008 | 1 | 1 | 1 | 1 | 1 | 2  | 28618813  |
| rs10209427 | 1 | 1 | 1 | 1 |   | 2  | 194423573 |
| rs10219237 |   | 1 |   | 1 |   | 11 | 73617782  |
| rs10230087 | 1 | 1 | 1 | 1 |   | 7  | 114041643 |
| rs10231280 |   | 1 |   | 1 |   | 7  | 108939799 |
| rs1023331  | 1 | 1 | 1 | 1 | 1 | 10 | 97756527  |
| rs10235162 | 1 | 1 | 1 | 1 |   | 7  | 114625356 |
| rs10242548 |   | 1 |   | 1 |   | 7  | 107249385 |
| rs10248051 | 1 | 1 | 1 | 1 |   | 7  | 51086847  |
| rs10249706 | 1 | 1 | 1 | 1 |   | 7  | 45727876  |
| rs1025229  |   | 1 |   | 1 |   | 8  | 18856300  |
| rs10260109 | 1 | 1 |   |   | 1 | 7  | 14822880  |
| rs10267453 | 1 | 1 | 1 | 1 | 1 | 7  | 14099830  |
| rs1026804  | 1 | 1 | 1 | 1 | 1 | 8  | 81680875  |
| rs1027003  |   | 1 |   | 1 |   | 2  | 108090183 |
| rs10274985 | 1 | 1 |   |   | 1 | 7  | 8566394   |
| rs10275986 |   | 1 |   | 1 |   | 7  | 13221452  |
| rs10276486 |   | 1 |   | 1 |   | 7  | 88546439  |
| rs1027841  | 1 | 1 | 1 | 1 |   | 4  | 146988524 |
| rs10279772 | 1 | 1 | 1 | 1 |   | 7  | 38672909  |
| rs1028378  | 1 | 1 |   |   | 1 | 6  | 148875711 |
| rs1030278  | 1 | 1 | 1 | 1 |   | 2  | 38288745  |
| rs1031757  | 1 | 1 | 1 | 1 |   | 6  | 2667343   |
| rs1033470  |   | 1 |   | 1 |   | 20 | 9673697   |

|            |   |   |   |   |   |    |           |
|------------|---|---|---|---|---|----|-----------|
| rs1035218  | 1 | 1 | 1 | 1 |   | 7  | 35502455  |
| rs10357    | 1 | 1 | 1 | 1 |   | 12 | 132010684 |
| rs1036295  | 1 | 1 | 1 | 1 |   | 2  | 47036268  |
| rs1037996  | 1 | 1 | 1 | 1 |   | 12 | 77839519  |
| rs1038638  | 1 | 1 |   |   | 1 | 7  | 130011632 |
| rs1039440  | 1 | 1 | 1 | 1 |   | 5  | 50536385  |
| rs1039621  | 1 | 1 | 1 | 1 |   | 7  | 158321830 |
| rs1040002  |   | 1 |   | 1 |   | 12 | 75472491  |
| rs10401677 | 1 | 1 | 1 | 1 | 1 | 19 | 37752960  |
| rs10403583 | 1 | 1 | 1 | 1 |   | 19 | 43983611  |
| rs10405617 | 1 | 1 | 1 | 1 |   | 19 | 10613968  |
| rs10411991 | 1 | 1 |   |   | 1 | 19 | 621828    |
| rs1041200  | 1 | 1 | 1 | 1 | 1 | 20 | 10927521  |
| rs10415488 |   | 1 |   | 1 |   | 19 | 5197717   |
| rs10415765 |   | 1 |   | 1 |   | 19 | 18309105  |
| rs10416265 | 1 | 1 |   |   | 1 | 19 | 38297140  |
| rs10417470 | 1 | 1 |   |   | 1 | 19 | 36896151  |
| rs10419661 | 1 | 1 | 1 | 1 |   | 19 | 51965108  |
| rs10420331 |   | 1 |   | 1 |   | 19 | 59160880  |
| rs10422784 | 1 | 1 |   |   | 1 | 19 | 13005062  |
| rs10428822 | 1 | 1 | 1 | 1 | 1 | 6  | 166523755 |
| rs10431150 | 1 | 1 | 1 | 1 |   | 11 | 70644511  |
| rs10433559 | 1 | 1 | 1 | 1 |   | 3  | 17740963  |
| rs1044581  | 1 | 1 |   |   | 1 | 15 | 71793744  |
| rs10447098 | 1 | 1 | 1 | 1 |   | 5  | 60866890  |
| rs10458890 |   | 1 |   | 1 |   | 11 | 25765193  |
| rs10468473 | 1 | 1 | 1 | 1 |   | 17 | 12068401  |
| rs1047268  | 1 | 1 |   |   | 1 | 17 | 30701608  |
| rs10473901 | 1 | 1 |   |   | 1 | 5  | 85435415  |
| rs10478046 | 1 | 1 | 1 | 1 | 1 | 5  | 110741382 |
| rs1047966  | 1 | 1 | 1 | 1 |   | 17 | 4939931   |
| rs10483323 |   | 1 |   | 1 |   | 14 | 26354562  |
| rs10483447 | 1 | 1 |   |   | 1 | 14 | 33018997  |
| rs10483452 |   | 1 |   | 1 |   | 14 | 34626249  |
| rs10483568 | 1 | 1 | 1 | 1 |   | 14 | 47056337  |
| rs10483804 | 1 | 1 | 1 | 1 |   | 14 | 67286804  |
| rs10484053 |   | 1 |   | 1 |   | 14 | 95081398  |
| rs10484238 |   | 1 |   | 1 |   | 14 | 43422032  |
| rs10484854 | 1 | 1 | 1 | 1 |   | 6  | 38772572  |
| rs10484867 | 1 | 1 | 1 | 1 |   | 6  | 98439288  |
| rs10485092 | 1 | 1 | 1 | 1 |   | 6  | 84864397  |
| rs10485497 | 1 | 1 |   |   | 1 | 20 | 29933631  |
| rs10485678 | 1 | 1 | 1 | 1 |   | 20 | 39096743  |
| rs10486011 | 1 | 1 | 1 | 1 |   | 7  | 97319748  |
| rs10486014 | 1 | 1 | 1 | 1 |   | 7  | 106017537 |
| rs10486207 |   | 1 |   | 1 |   | 7  | 8077305   |
| rs10486461 | 1 | 1 | 1 | 1 |   | 7  | 26483612  |
| rs10488211 | 1 | 1 |   |   | 1 | 7  | 132203858 |
| rs10488500 | 1 | 1 | 1 | 1 |   | 7  | 76679195  |
| rs10488695 | 1 | 1 |   |   | 1 | 11 | 113518301 |
| rs10489461 | 1 | 1 | 1 | 1 |   | 1  | 54061608  |
| rs10489671 | 1 | 1 |   |   | 1 | 1  | 155805349 |

|            |   |   |   |   |   |    |           |
|------------|---|---|---|---|---|----|-----------|
| rs10490073 | 1 | 1 |   |   | 1 | 2  | 150168116 |
| rs10490656 | 1 | 1 | 1 | 1 |   | 2  | 37085212  |
| rs10490757 | 1 | 1 |   |   | 1 | 2  | 217834481 |
| rs10491030 | 1 | 1 | 1 | 1 |   | 10 | 130690227 |
| rs10491120 | 1 | 1 | 1 | 1 |   | 17 | 32062557  |
| rs10491367 | 1 | 1 | 1 | 1 |   | 5  | 54239231  |
| rs10492467 | 1 | 1 | 1 | 1 |   | 13 | 70639393  |
| rs10493152 | 1 | 1 |   |   | 1 | 1  | 50901365  |
| rs10493277 | 1 | 1 |   |   | 1 | 1  | 60279332  |
| rs10493621 | 1 | 1 | 1 | 1 |   | 1  | 79292015  |
| rs10493649 | 1 | 1 | 1 | 1 | 1 | 1  | 79980647  |
| rs10493770 | 1 | 1 | 1 | 1 |   | 1  | 85807452  |
| rs10494083 | 1 | 1 | 1 | 1 |   | 1  | 108249725 |
| rs10494572 | 1 | 1 |   |   | 1 | 1  | 182250203 |
| rs10494878 | 1 | 1 | 1 | 1 | 1 | 1  | 204982432 |
| rs10495592 | 1 | 1 |   |   | 1 | 2  | 12165935  |
| rs1049598  |   | 1 |   | 1 |   | 15 | 38937116  |
| rs10495988 | 1 | 1 | 1 | 1 |   | 2  | 50009439  |
| rs10496131 | 1 | 1 |   |   | 1 | 2  | 66156377  |
| rs10496342 | 1 | 1 | 1 | 1 |   | 2  | 99777076  |
| rs10496354 | 1 | 1 | 1 | 1 |   | 2  | 101614513 |
| rs10496557 | 1 | 1 | 1 | 1 |   | 2  | 119603905 |
| rs10496615 | 1 | 1 |   |   | 1 | 2  | 123995938 |
| rs10496860 | 1 | 1 |   |   | 1 | 2  | 141387720 |
| rs10496905 |   | 1 |   | 1 |   | 2  | 142352930 |
| rs10496954 | 1 | 1 | 1 | 1 |   | 2  | 144386056 |
| rs10497257 |   | 1 |   | 1 |   | 2  | 165739074 |
| rs10498303 |   | 1 |   | 1 |   | 14 | 28974819  |
| rs10498377 | 1 | 1 | 1 | 1 |   | 14 | 42482338  |
| rs10498454 | 1 | 1 |   |   | 1 | 14 | 53308747  |
| rs10499100 |   | 1 |   | 1 |   | 6  | 121250044 |
| rs10499602 | 1 | 1 |   |   | 1 | 7  | 38553497  |
| rs10499748 | 1 | 1 | 1 | 1 |   | 7  | 54694309  |
| rs10500003 | 1 | 1 |   |   | 1 | 7  | 110269989 |
| rs10500130 | 1 | 1 |   |   | 1 | 7  | 138466453 |
| rs10500812 | 1 | 1 | 1 | 1 |   | 11 | 15232135  |
| rs10500956 | 1 | 1 | 1 | 1 |   | 11 | 23435031  |
| rs10501082 | 1 | 1 | 1 | 1 |   | 11 | 27227554  |
| rs10501128 | 1 | 1 |   |   | 1 | 11 | 33669411  |
| rs10501445 | 1 | 1 | 1 | 1 |   | 11 | 78876638  |
| rs10501518 | 1 | 1 | 1 | 1 |   | 11 | 80884912  |
| rs10502232 |   | 1 |   | 1 |   | 11 | 119295278 |
| rs10502335 |   | 1 |   | 1 |   | 18 | 5894333   |
| rs10502693 | 1 | 1 |   |   | 1 | 18 | 34299710  |
| rs10503068 | 1 | 1 | 1 | 1 |   | 18 | 58102113  |
| rs10503767 | 1 | 1 |   |   | 1 | 8  | 24979173  |
| rs10504180 | 1 | 1 | 1 | 1 |   | 8  | 56163454  |
| rs10504268 | 1 | 1 | 1 | 1 |   | 8  | 59989174  |
| rs10504705 |   | 1 |   | 1 |   | 8  | 80398017  |
| rs10505505 | 1 | 1 | 1 | 1 |   | 8  | 128808953 |
| rs10505550 | 1 | 1 |   |   | 1 | 8  | 131597332 |
| rs10506138 |   | 1 |   | 1 |   | 12 | 38598763  |

|            |   |   |   |   |   |    |           |
|------------|---|---|---|---|---|----|-----------|
| rs10506479 | 1 | 1 | 1 | 1 |   | 12 | 64826291  |
| rs10506554 | 1 | 1 |   |   | 1 | 12 | 66195266  |
| rs10506701 |   | 1 |   | 1 |   | 12 | 72872477  |
| rs10508738 | 1 | 1 |   |   | 1 | 10 | 28711650  |
| rs10509506 | 1 | 1 | 1 | 1 |   | 10 | 86803736  |
| rs10509543 | 1 | 1 | 1 | 1 |   | 10 | 90062332  |
| rs10509631 | 1 | 1 | 1 | 1 |   | 10 | 93355411  |
| rs10509826 | 1 | 1 | 1 | 1 | 1 | 10 | 108794830 |
| rs10510127 | 1 | 1 |   |   | 1 | 10 | 125006421 |
| rs10510254 | 1 | 1 | 1 | 1 |   | 3  | 3254498   |
| rs10510268 | 1 | 1 | 1 | 1 | 1 | 3  | 3539506   |
| rs10510771 | 1 | 1 |   |   | 1 | 3  | 54696095  |
| rs10511715 | 1 | 1 | 1 | 1 | 1 | 9  | 23069238  |
| rs10511771 | 1 | 1 | 1 | 1 |   | 9  | 26288134  |
| rs10511802 |   | 1 |   | 1 |   | 9  | 27158315  |
| rs10512144 | 1 | 1 | 1 | 1 |   | 9  | 85941612  |
| rs10512445 | 1 | 1 |   |   | 1 | 17 | 28877187  |
| rs10513729 | 1 | 1 | 1 | 1 | 1 | 3  | 176163941 |
| rs10513798 | 1 | 1 |   |   | 1 | 3  | 185971610 |
| rs10513865 | 1 | 1 | 1 | 1 |   | 3  | 192571579 |
| rs10514007 |   | 1 |   | 1 |   | 18 | 67147359  |
| rs10514129 | 1 | 1 | 1 | 1 |   | 18 | 70187838  |
| rs10515046 | 1 | 1 | 1 | 1 |   | 17 | 49129918  |
| rs10515351 |   | 1 |   | 1 |   | 5  | 104554013 |
| rs10515421 | 1 | 1 | 1 | 1 |   | 5  | 110518996 |
| rs10515441 | 1 | 1 | 1 | 1 |   | 5  | 111563400 |
| rs10515998 | 1 | 1 | 1 | 1 |   | 18 | 61521202  |
| rs10516047 | 1 | 1 |   |   | 1 | 5  | 167868597 |
| rs10516487 | 1 | 1 | 1 | 1 |   | 4  | 102970099 |
| rs1051669  |   | 1 |   | 1 |   | 12 | 892713    |
| rs10517060 |   | 1 |   | 1 |   | 4  | 24538378  |
| rs10517660 | 1 | 1 | 1 | 1 | 1 | 4  | 158061846 |
| rs10517677 | 1 | 1 | 1 | 1 |   | 4  | 158949630 |
| rs10517796 | 1 | 1 | 1 | 1 |   | 4  | 165130039 |
| rs10517919 |   | 1 |   | 1 |   | 4  | 168199023 |
| rs10518452 | 1 | 1 | 1 | 1 |   | 4  | 125993264 |
| rs10518627 | 1 | 1 | 1 | 1 |   | 4  | 134033982 |
| rs10518651 |   | 1 |   | 1 |   | 1  | 81339930  |
| rs10519005 | 1 | 1 | 1 | 1 | 1 | 15 | 57498983  |
| rs10519193 |   | 1 |   | 1 |   | 15 | 46950245  |
| rs10519198 | 1 | 1 |   |   | 1 | 15 | 76529809  |
| rs10519201 | 1 | 1 | 1 | 1 |   | 15 | 47008883  |
| rs10519410 | 1 | 1 | 1 | 1 | 1 | 4  | 138354031 |
| rs10519465 |   | 1 |   | 1 |   | 4  | 139570675 |
| rs10519510 | 1 | 1 | 1 | 1 |   | 5  | 116835987 |
| rs10519758 |   | 1 |   | 1 |   | 15 | 30938780  |
| rs10520392 | 1 | 1 | 1 | 1 |   | 4  | 178863374 |
| rs10520656 | 1 | 1 | 1 | 1 |   | 15 | 85910263  |
| rs10521057 | 1 | 1 | 1 | 1 |   | 9  | 103364366 |
| rs10521434 |   | 1 |   | 1 |   | 9  | 71638815  |
| rs1052990  | 1 | 1 |   |   | 1 | 7  | 115935606 |
| rs1053815  | 1 | 1 |   |   | 1 | 11 | 95349638  |

|            |   |   |   |   |   |    |           |
|------------|---|---|---|---|---|----|-----------|
| rs1056198  |   | 1 |   | 1 |   | 20 | 47989636  |
| rs10605    |   | 1 |   | 1 |   | 7  | 7885167   |
| rs1061837  | 1 | 1 |   |   | 1 | 5  | 150541530 |
| rs1062190  |   | 1 |   | 1 |   | 10 | 22903497  |
| rs1062213  | 1 | 1 | 1 | 1 |   | 7  | 4118615   |
| rs10711    | 1 | 1 | 1 | 1 |   | 10 | 62224480  |
| rs10733333 | 1 | 1 | 1 | 1 |   | 9  | 16893446  |
| rs1073368  |   | 1 |   | 1 |   | 11 | 44005261  |
| rs10739277 | 1 | 1 | 1 | 1 | 1 | 9  | 111091779 |
| rs10741808 | 1 | 1 | 1 | 1 |   | 11 | 19977460  |
| rs10743585 |   | 1 |   | 1 |   | 12 | 26486215  |
| rs10745776 | 1 | 1 |   |   | 1 | 12 | 95902258  |
| rs10745793 | 1 | 1 | 1 | 1 |   | 12 | 96286201  |
| rs10746763 | 1 | 1 | 1 | 1 | 1 | 9  | 87321377  |
| rs10750140 |   | 1 |   | 1 |   | 11 | 118828494 |
| rs10753415 | 1 | 1 | 1 | 1 |   | 1  | 224452246 |
| rs10757554 |   | 1 |   | 1 |   | 9  | 25566545  |
| rs10758823 | 1 | 1 | 1 | 1 | 1 | 9  | 7078043   |
| rs10760423 | 1 | 1 |   |   | 1 | 9  | 128059069 |
| rs1076105  | 1 | 1 |   |   | 1 | 22 | 16062165  |
| rs10761660 | 1 | 1 | 1 | 1 |   | 10 | 64186312  |
| rs1076513  | 1 | 1 | 1 | 1 |   | 19 | 38869427  |
| rs1076653  |   | 1 |   | 1 |   | 22 | 34255861  |
| rs1076971  |   | 1 |   | 1 |   | 18 | 39019234  |
| rs10770437 | 1 | 1 | 1 | 1 | 1 | 12 | 19190657  |
| rs10776798 | 1 | 1 | 1 | 1 | 1 | 1  | 115663777 |
| rs10777342 | 1 | 1 | 1 | 1 |   | 12 | 90781264  |
| rs10777483 | 1 | 1 | 1 | 1 |   | 12 | 92126131  |
| rs10778827 |   | 1 |   | 1 |   | 12 | 80629514  |
| rs10780514 | 1 | 1 | 1 | 1 |   | 9  | 83217806  |
| rs10780596 | 1 | 1 | 1 | 1 |   | 9  | 85150660  |
| rs10783028 | 1 | 1 | 1 | 1 |   | 1  | 96142798  |
| rs1078982  | 1 | 1 | 1 | 1 |   | 3  | 124307730 |
| rs10792322 | 1 | 1 | 1 | 1 |   | 11 | 61518128  |
| rs1079348  |   | 1 |   | 1 |   | 16 | 8780957   |
| rs10794324 | 1 | 1 | 1 | 1 |   | 11 | 418489    |
| rs10794471 |   | 1 |   | 1 |   | 12 | 130681620 |
| rs10794696 | 1 | 1 | 1 | 1 |   | 5  | 178174101 |
| rs10795076 | 1 | 1 | 1 | 1 |   | 10 | 3815343   |
| rs10795942 | 1 | 1 | 1 | 1 |   | 10 | 12315542  |
| rs1079783  |   | 1 |   | 1 |   | 9  | 135452684 |
| rs10798977 | 1 | 1 | 1 | 1 |   | 1  | 33909921  |
| rs1079926  | 1 | 1 |   |   | 1 | 16 | 50943957  |
| rs10799312 | 1 | 1 | 1 | 1 |   | 1  | 223719773 |
| rs10808484 | 1 | 1 | 1 | 1 |   | 8  | 117748385 |
| rs10808796 | 1 | 1 | 1 | 1 |   | 8  | 74732094  |
| rs10808828 |   | 1 |   | 1 |   | 8  | 80054752  |
| rs10809877 | 1 | 1 |   |   | 1 | 9  | 13021013  |
| rs10809903 |   | 1 |   | 1 |   | 9  | 1309470   |
| rs10810173 | 1 | 1 |   |   | 1 | 9  | 14520882  |
| rs10811927 |   | 1 |   | 1 |   | 9  | 23413892  |
| rs10812520 | 1 | 1 | 1 | 1 | 1 | 9  | 27037246  |

|            |   |   |   |   |   |    |           |
|------------|---|---|---|---|---|----|-----------|
| rs10820995 | 1 | 1 |   |   | 1 | 9  | 94395540  |
| rs10824914 | 1 | 1 | 1 | 1 |   | 10 | 51465401  |
| rs10825066 | 1 | 1 | 1 | 1 |   | 10 | 55004011  |
| rs10828136 | 1 | 1 | 1 | 1 |   | 10 | 21141429  |
| rs10831905 | 1 | 1 | 1 | 1 |   | 11 | 12733043  |
| rs10833328 | 1 | 1 |   |   | 1 | 11 | 20432136  |
| rs10835941 | 1 | 1 | 1 | 1 |   | 11 | 32509711  |
| rs10842053 | 1 | 1 | 1 | 1 |   | 12 | 22743552  |
| rs10843894 | 1 | 1 | 1 | 1 |   | 12 | 31187486  |
| rs10848934 |   | 1 |   | 1 |   | 12 | 3748920   |
| rs10849087 | 1 | 1 | 1 | 1 |   | 12 | 4520326   |
| rs10849359 |   | 1 |   | 1 |   | 12 | 607491    |
| rs10857228 | 1 | 1 |   |   | 1 | 4  | 149199150 |
| rs10859346 |   | 1 |   | 1 |   | 12 | 91537897  |
| rs10859907 |   | 1 |   | 1 |   | 12 | 94520037  |
| rs10862805 |   | 1 |   | 1 |   | 12 | 82881352  |
| rs10863725 | 1 | 1 | 1 | 1 |   | 1  | 207017455 |
| rs10868262 | 1 | 1 | 1 | 1 |   | 9  | 71720135  |
| rs10869073 |   | 1 |   | 1 |   | 9  | 73790337  |
| rs10875223 | 1 | 1 | 1 | 1 |   | 1  | 99694804  |
| rs10876840 |   | 1 |   | 1 |   | 12 | 54321281  |
| rs10878994 |   | 1 |   | 1 |   | 12 | 68146963  |
| rs10880801 | 1 | 1 |   |   | 1 | 12 | 44185663  |
| rs10883479 | 1 | 1 | 1 | 1 |   | 10 | 102152850 |
| rs10884778 |   | 1 |   | 1 |   | 10 | 111177106 |
| rs10885355 | 1 | 1 | 1 | 1 |   | 10 | 114248441 |
| rs10886671 | 1 | 1 | 1 | 1 |   | 10 | 122111778 |
| rs10887047 | 1 | 1 | 1 | 1 |   | 10 | 123770790 |
| rs10887382 |   | 1 |   | 1 |   | 10 | 86561922  |
| rs10888101 | 1 | 1 | 1 | 1 |   | 8  | 14947165  |
| rs10889272 | 1 | 1 | 1 | 1 |   | 1  | 62175137  |
| rs10889750 | 1 | 1 | 1 | 1 | 1 | 1  | 41183836  |
| rs10889786 | 1 | 1 | 1 | 1 |   | 1  | 68906428  |
| rs10894965 | 1 | 1 |   |   | 1 | 11 | 96348564  |
| rs10895115 | 1 | 1 | 1 | 1 |   | 11 | 100857637 |
| rs10896958 | 1 | 1 | 1 | 1 |   | 11 | 58793269  |
| rs10898906 | 1 | 1 | 1 | 1 |   | 11 | 72594917  |
| rs10904588 |   | 1 |   | 1 |   | 10 | 981737    |
| rs10905097 |   | 1 |   | 1 |   | 10 | 7121240   |
| rs10905617 | 1 | 1 |   |   | 1 | 10 | 9835659   |
| rs10908907 | 1 | 1 | 1 | 1 | 1 | 9  | 91439404  |
| rs10914880 |   | 1 |   | 1 |   | 1  | 34393357  |
| rs10917268 | 1 | 1 | 1 | 1 |   | 1  | 22810405  |
| rs10923142 | 1 | 1 | 1 | 1 |   | 1  | 116006184 |
| rs10924102 | 1 | 1 |   |   | 1 | 1  | 116832505 |
| rs10924440 | 1 | 1 | 1 | 1 |   | 1  | 244230808 |
| rs10928081 | 1 | 1 | 1 | 1 |   | 2  | 141437110 |
| rs10929646 | 1 | 1 | 1 | 1 | 1 | 2  | 10302548  |
| rs10930718 | 1 | 1 | 1 | 1 |   | 2  | 176450999 |
| rs10932040 | 1 | 1 | 1 | 1 |   | 2  | 204561942 |
| rs1093309  | 1 | 1 | 1 | 1 |   | 12 | 116409591 |
| rs10942957 | 1 | 1 | 1 | 1 |   | 6  | 72393738  |

|            |   |   |   |   |   |    |           |
|------------|---|---|---|---|---|----|-----------|
| rs10943643 | 1 | 1 |   |   | 1 | 6  | 64029913  |
| rs10943720 | 1 | 1 | 1 | 1 |   | 6  | 81331055  |
| rs10948260 | 1 | 1 |   |   | 1 | 6  | 45911274  |
| rs10948327 | 1 | 1 | 1 | 1 |   | 6  | 47174513  |
| rs109490   | 1 | 1 |   |   | 1 | 1  | 18445488  |
| rs10953428 | 1 | 1 | 1 | 1 |   | 7  | 103814099 |
| rs10954211 | 1 | 1 |   |   | 1 | 7  | 128308667 |
| rs10954638 | 1 | 1 | 1 | 1 |   | 7  | 138241530 |
| rs10958648 | 1 | 1 | 1 | 1 |   | 8  | 40974710  |
| rs10962589 | 1 | 1 | 1 | 1 | 1 | 9  | 16773380  |
| rs10964808 | 1 | 1 | 1 | 1 |   | 9  | 21023557  |
| rs10967081 | 1 | 1 | 1 | 1 |   | 9  | 2579864   |
| rs10968042 | 1 | 1 | 1 | 1 |   | 9  | 27662182  |
| rs10969030 | 1 | 1 | 1 | 1 |   | 9  | 29241379  |
| rs10971350 | 1 | 1 |   |   | 1 | 9  | 33022316  |
| rs10972619 |   | 1 |   | 1 |   | 9  | 35898488  |
| rs10978931 |   | 1 |   | 1 |   | 9  | 109386549 |
| rs10979066 | 1 | 1 | 1 | 1 |   | 9  | 109637340 |
| rs10982246 | 1 | 1 | 1 | 1 |   | 9  | 116290214 |
| rs10984338 | 1 | 1 | 1 | 1 |   | 9  | 120758739 |
| rs10991224 |   | 1 |   | 1 |   | 9  | 106143949 |
| rs10995687 | 1 | 1 |   |   | 1 | 10 | 65339075  |
| rs11000000 | 1 | 1 | 1 | 1 |   | 10 | 73216067  |
| rs11021168 |   | 1 |   | 1 |   | 11 | 94832039  |
| rs11023518 | 1 | 1 |   |   | 1 | 11 | 15286691  |
| rs11031538 |   | 1 |   | 1 |   | 11 | 31925200  |
| rs1104756  | 1 | 1 | 1 | 1 |   | 4  | 8181758   |
| rs1104965  | 1 | 1 |   |   | 1 | 5  | 171006412 |
| rs11050554 |   | 1 |   | 1 |   | 12 | 29975269  |
| rs11055697 | 1 | 1 | 1 | 1 |   | 12 | 14011756  |
| rs11058464 | 1 | 1 |   |   | 1 | 12 | 125084503 |
| rs11059536 | 1 | 1 |   |   | 1 | 12 | 127173376 |
| rs11061702 | 1 | 1 |   |   | 1 | 12 | 1307115   |
| rs1106229  |   | 1 |   | 1 |   | 9  | 128027655 |
| rs11066320 | 1 | 1 | 1 | 1 | 1 | 12 | 111390798 |
| rs11071936 | 1 | 1 |   |   | 1 | 15 | 30816842  |
| rs11078176 | 1 | 1 |   |   | 1 | 17 | 13540038  |
| rs11079563 |   | 1 |   | 1 |   | 17 | 60742384  |
| rs11085023 | 1 | 1 |   |   | 1 | 19 | 3522446   |
| rs1108906  | 1 | 1 |   |   | 1 | 11 | 126813787 |
| rs11100843 | 1 | 1 |   |   | 1 | 4  | 145397132 |
| rs11101312 | 1 | 1 | 1 | 1 |   | 10 | 49277756  |
| rs11106763 |   | 1 |   | 1 |   | 12 | 91872651  |
| rs11107018 | 1 | 1 | 1 | 1 | 1 | 12 | 92338033  |
| rs11108860 |   | 1 |   | 1 |   | 12 | 96081537  |
| rs11109097 |   | 1 |   | 1 |   | 12 | 96452568  |
| rs11111689 | 1 | 1 | 1 | 1 |   | 12 | 102553592 |
| rs11115010 |   | 1 |   | 1 |   | 12 | 80690026  |
| rs11117791 | 1 | 1 | 1 | 1 |   | 1  | 215422211 |
| rs11118045 | 1 | 1 | 1 | 1 |   | 1  | 216399032 |
| rs11118949 | 1 | 1 |   |   | 1 | 1  | 220343859 |
| rs11119145 | 1 | 1 | 1 | 1 |   | 1  | 207116052 |

|            |   |   |   |   |   |    |           |
|------------|---|---|---|---|---|----|-----------|
| rs11119274 | 1 | 1 | 1 | 1 |   | 1  | 207683322 |
| rs11121515 | 1 | 1 |   |   | 1 | 1  | 10048352  |
| rs11123410 | 1 | 1 | 1 | 1 |   | 2  | 111673544 |
| rs11123861 | 1 | 1 | 1 | 1 | 1 | 2  | 97676314  |
| rs11129801 | 1 | 1 |   |   | 1 | 3  | 38725379  |
| rs11130296 | 1 | 1 | 1 | 1 |   | 3  | 51787992  |
| rs11130841 | 1 | 1 | 1 | 1 | 1 | 3  | 61378028  |
| rs11134988 | 1 | 1 |   |   | 1 | 5  | 176001709 |
| rs11136596 | 1 | 1 | 1 | 1 |   | 8  | 3126569   |
| rs11138141 | 1 | 1 | 1 | 1 |   | 9  | 81105899  |
| rs11144702 |   | 1 |   | 1 |   | 9  | 77773234  |
| rs11144870 | 1 | 1 |   |   | 1 | 9  | 78194033  |
| rs11146457 | 1 | 1 | 1 | 1 | 1 | 10 | 134332339 |
| rs11147671 | 1 | 1 | 1 | 1 |   | 13 | 37243195  |
| rs11149981 | 1 | 1 |   |   | 1 | 16 | 75927639  |
| rs11151863 | 1 | 1 | 1 | 1 | 1 | 18 | 69270859  |
| rs11152012 |   | 1 |   | 1 |   | 18 | 53144972  |
| rs11152343 | 1 | 1 | 1 | 1 |   | 18 | 58237240  |
| rs11153162 | 1 | 1 | 1 | 1 |   | 6  | 97311015  |
| rs11155282 | 1 | 1 |   |   | 1 | 6  | 100699743 |
| rs11162802 | 1 | 1 | 1 | 1 |   | 1  | 79950535  |
| rs11163055 | 1 | 1 | 1 | 1 |   | 1  | 80811557  |
| rs1116507  | 1 | 1 |   |   | 1 | 20 | 49356560  |
| rs11165281 | 1 | 1 | 1 | 1 |   | 1  | 95202368  |
| rs11166907 |   | 1 |   | 1 |   | 8  | 136029440 |
| rs11172147 | 1 | 1 | 1 | 1 |   | 12 | 55982944  |
| rs11174549 | 1 | 1 | 1 | 1 |   | 12 | 61245404  |
| rs11179848 |   | 1 |   | 1 |   | 12 | 72645068  |
| rs11183847 | 1 | 1 | 1 | 1 |   | 12 | 46002798  |
| rs11184219 | 1 | 1 | 1 | 1 |   | 1  | 104935951 |
| rs11186543 | 1 | 1 | 1 | 1 | 1 | 10 | 93109747  |
| rs11189563 | 1 | 1 |   |   | 1 | 10 | 100093996 |
| rs11189831 | 1 | 1 | 1 | 1 |   | 10 | 83174129  |
| rs11196967 | 1 | 1 | 1 | 1 |   | 10 | 116640629 |
| rs11204020 | 1 | 1 | 1 | 1 |   | 8  | 18991418  |
| rs11221731 | 1 | 1 | 1 | 1 |   | 11 | 128877970 |
| rs11227678 | 1 | 1 | 1 | 1 |   | 11 | 66599045  |
| rs1122821  | 1 | 1 | 1 | 1 |   | 19 | 18911957  |
| rs11230085 | 1 | 1 |   |   | 1 | 11 | 59334898  |
| rs1123049  | 1 | 1 |   |   | 1 | 5  | 14077965  |
| rs1123991  | 1 | 1 | 1 | 1 |   | 11 | 4659741   |
| rs11241258 | 1 | 1 | 1 | 1 |   | 5  | 113397504 |
| rs11241496 | 1 | 1 |   |   | 1 | 5  | 118602461 |
| rs1124602  | 1 | 1 | 1 | 1 |   | 9  | 129382813 |
| rs1125020  | 1 | 1 | 1 | 1 |   | 12 | 3134767   |
| rs11251998 | 1 | 1 | 1 | 1 |   | 10 | 3687104   |
| rs11258614 | 1 | 1 | 1 | 1 |   | 10 | 13871879  |
| rs11265187 | 1 | 1 |   |   | 1 | 1  | 157645218 |
| rs1127379  | 1 | 1 | 1 | 1 | 1 | 8  | 41240437  |
| rs1134715  | 1 | 1 |   |   | 1 | 16 | 78390258  |
| rs1135093  | 1 | 1 |   |   | 1 | 5  | 148988714 |
| rs1151350  |   | 1 |   | 1 |   | 12 | 130124315 |

|            |   |   |   |   |   |    |           |
|------------|---|---|---|---|---|----|-----------|
| rs1153860  | 1 | 1 | 1 | 1 | 1 | 15 | 43423876  |
| rs11539202 | 1 | 1 | 1 | 1 |   | 11 | 34925688  |
| rs1154278  | 1 | 1 | 1 | 1 |   | 3  | 113969427 |
| rs11544593 | 1 | 1 | 1 | 1 | 1 | 3  | 57278724  |
| rs11562934 |   | 1 |   | 1 |   | 4  | 118702646 |
| rs11562980 |   | 1 |   | 1 |   | 2  | 234405014 |
| rs11564339 |   | 1 |   | 1 |   | 18 | 23985498  |
| rs11564361 | 1 | 1 | 1 | 1 | 1 | 18 | 24158866  |
| rs1156816  | 1 | 1 | 1 | 1 |   | 19 | 44825278  |
| rs11576172 | 1 | 1 |   |   | 1 | 1  | 215391277 |
| rs11579554 | 1 | 1 | 1 | 1 |   | 1  | 80216737  |
| rs11590681 | 1 | 1 | 1 | 1 |   | 1  | 34113590  |
| rs11593576 | 1 | 1 | 1 | 1 |   | 10 | 80685902  |
| rs11595067 | 1 | 1 | 1 | 1 |   | 10 | 80049488  |
| rs1159794  | 1 | 1 |   |   | 1 | 22 | 26148428  |
| rs11599750 | 1 | 1 | 1 | 1 |   | 10 | 101795432 |
| rs11602256 | 1 | 1 | 1 | 1 |   | 11 | 67900859  |
| rs11603501 | 1 | 1 | 1 | 1 |   | 11 | 25843061  |
| rs11607746 | 1 | 1 | 1 | 1 |   | 11 | 78542253  |
| rs11622517 | 1 | 1 | 1 | 1 |   | 14 | 75835500  |
| rs11629910 | 1 | 1 | 1 | 1 |   | 15 | 51473913  |
| rs11630690 |   | 1 |   | 1 |   | 15 | 99121689  |
| rs11632449 | 1 | 1 | 1 | 1 |   | 15 | 67006398  |
| rs11634215 | 1 | 1 | 1 | 1 |   | 15 | 85559990  |
| rs11634465 | 1 | 1 | 1 | 1 |   | 15 | 84925312  |
| rs11635677 | 1 | 1 | 1 | 1 |   | 15 | 29191625  |
| rs11635749 | 1 | 1 | 1 | 1 |   | 15 | 68073971  |
| rs11638223 | 1 | 1 |   |   | 1 | 15 | 54681770  |
| rs11641709 | 1 | 1 | 1 | 1 |   | 16 | 26964600  |
| rs11642445 | 1 | 1 | 1 | 1 |   | 16 | 83646696  |
| rs11642715 | 1 | 1 | 1 | 1 |   | 16 | 77904541  |
| rs11644921 | 1 | 1 | 1 | 1 |   | 16 | 22680826  |
| rs11649230 | 1 | 1 |   |   | 1 | 16 | 16767302  |
| rs11656955 | 1 | 1 | 1 | 1 |   | 17 | 46403063  |
| rs11669442 | 1 | 1 | 1 | 1 |   | 19 | 51066397  |
| rs11674199 |   | 1 |   | 1 |   | 2  | 100923998 |
| rs11678399 | 1 | 1 |   |   | 1 | 2  | 118950142 |
| rs11678648 | 1 | 1 | 1 | 1 |   | 2  | 153756398 |
| rs11682769 | 1 | 1 | 1 | 1 |   | 2  | 7278731   |
| rs1168553  | 1 | 1 | 1 | 1 |   | 14 | 37934281  |
| rs11686077 | 1 | 1 | 1 | 1 |   | 2  | 218166274 |
| rs11687731 | 1 | 1 |   |   | 1 | 2  | 81920423  |
| rs11692435 | 1 | 1 | 1 | 1 |   | 2  | 97641786  |
| rs11695049 | 1 | 1 | 1 | 1 |   | 2  | 207559619 |
| rs11698898 | 1 | 1 | 1 | 1 |   | 20 | 51811441  |
| rs11702531 | 1 | 1 | 1 | 1 | 1 | 21 | 40399077  |
| rs11706497 | 1 | 1 | 1 | 1 |   | 3  | 89621056  |
| rs1171148  |   | 1 |   | 1 |   | 1  | 188644611 |
| rs11711931 | 1 | 1 |   |   | 1 | 3  | 128304274 |
| rs11712075 | 1 | 1 | 1 | 1 |   | 3  | 43338209  |
| rs11713015 | 1 | 1 |   |   | 1 | 3  | 46548322  |
| rs11718332 | 1 | 1 |   |   | 1 | 3  | 158534193 |

|            |   |   |   |   |   |    |           |
|------------|---|---|---|---|---|----|-----------|
| rs11724589 | 1 | 1 |   |   | 1 | 4  | 146112725 |
| rs11727514 | 1 | 1 |   |   | 1 | 4  | 175919425 |
| rs11728514 | 1 | 1 |   |   | 1 | 4  | 155333844 |
| rs11730565 | 1 | 1 | 1 | 1 | 1 | 4  | 176563433 |
| rs11731647 | 1 | 1 | 1 | 1 |   | 4  | 172243573 |
| rs11732391 | 1 | 1 |   |   | 1 | 4  | 30416342  |
| rs11735755 | 1 | 1 | 1 | 1 |   | 4  | 95847504  |
| rs11735972 | 1 | 1 | 1 | 1 |   | 4  | 122771823 |
| rs11740343 |   | 1 |   | 1 |   | 5  | 80849681  |
| rs11748140 | 1 | 1 | 1 | 1 |   | 5  | 56765369  |
| rs11753035 | 1 | 1 |   |   | 1 | 6  | 124658216 |
| rs11754258 | 1 | 1 | 1 | 1 |   | 6  | 135186315 |
| rs11756366 | 1 | 1 | 1 | 1 | 1 | 6  | 153893287 |
| rs11756439 | 1 | 1 | 1 | 1 |   | 6  | 169389955 |
| rs11757369 | 1 | 1 | 1 | 1 |   | 6  | 64970057  |
| rs11759031 | 1 | 1 | 1 | 1 |   | 6  | 155556947 |
| rs11760907 | 1 | 1 | 1 | 1 |   | 7  | 130916599 |
| rs11761305 | 1 | 1 | 1 | 1 |   | 7  | 116775146 |
| rs11761774 | 1 | 1 | 1 | 1 | 1 | 7  | 141507938 |
| rs11762889 | 1 | 1 |   |   | 1 | 7  | 4291256   |
| rs11767724 | 1 | 1 | 1 | 1 |   | 7  | 135609295 |
| rs11768706 | 1 | 1 | 1 | 1 |   | 7  | 155159834 |
| rs11771361 |   | 1 |   | 1 |   | 7  | 80759441  |
| rs11772445 | 1 | 1 | 1 | 1 |   | 7  | 107602394 |
| rs11773209 | 1 | 1 | 1 | 1 |   | 7  | 157744263 |
| rs11775463 |   | 1 |   | 1 |   | 8  | 3475176   |
| rs11778372 | 1 | 1 | 1 | 1 |   | 8  | 17382789  |
| rs11780780 | 1 | 1 | 1 | 1 |   | 8  | 41742759  |
| rs11780821 | 1 | 1 | 1 | 1 | 1 | 8  | 79270073  |
| rs11783562 | 1 | 1 |   |   | 1 | 8  | 30958088  |
| rs11784678 | 1 | 1 | 1 | 1 | 1 | 8  | 80450772  |
| rs11786174 | 1 | 1 | 1 | 1 |   | 8  | 28094708  |
| rs11791419 | 1 | 1 | 1 | 1 |   | 9  | 131517913 |
| rs11793897 | 1 | 1 | 1 | 1 |   | 9  | 85522663  |
| rs11799558 | 1 | 1 | 1 | 1 |   | 1  | 64953051  |
| rs11799813 | 1 | 1 | 1 | 1 |   | 1  | 148602364 |
| rs1180397  |   | 1 |   | 1 |   | 7  | 12658464  |
| rs11811998 | 1 | 1 | 1 | 1 |   | 1  | 40131313  |
| rs11812285 | 1 | 1 | 1 | 1 |   | 10 | 96750802  |
| rs11818345 | 1 | 1 |   |   | 1 | 10 | 134202610 |
| rs11831940 | 1 | 1 | 1 | 1 |   | 12 | 46476433  |
| rs11839068 | 1 | 1 | 1 | 1 |   | 13 | 72014214  |
| rs11841049 | 1 | 1 | 1 | 1 |   | 13 | 63881065  |
| rs11850144 | 1 | 1 |   |   | 1 | 14 | 82130291  |
| rs11851852 | 1 | 1 | 1 | 1 |   | 14 | 104239473 |
| rs11854173 | 1 | 1 | 1 | 1 |   | 15 | 100021401 |
| rs11854557 | 1 | 1 |   |   | 1 | 15 | 47360252  |
| rs11862729 | 1 | 1 |   |   | 1 | 16 | 14053599  |
| rs11870879 | 1 | 1 | 1 | 1 | 1 | 17 | 45102647  |
| rs11872249 |   | 1 |   | 1 |   | 18 | 59858833  |
| rs1187763  | 1 | 1 | 1 | 1 |   | 14 | 94957664  |
| rs11881242 | 1 | 1 | 1 | 1 |   | 19 | 40975687  |

|            |   |   |   |   |   |    |           |
|------------|---|---|---|---|---|----|-----------|
| rs11883054 |   | 1 |   | 1 |   | 19 | 10018219  |
| rs11903722 | 1 | 1 |   |   | 1 | 2  | 11078995  |
| rs11906231 | 1 | 1 | 1 | 1 |   | 20 | 46062004  |
| rs11914832 | 1 | 1 | 1 | 1 | 1 | 3  | 21483437  |
| rs11916893 | 1 | 1 | 1 | 1 |   | 3  | 130195068 |
| rs11925597 |   | 1 |   | 1 |   | 3  | 153768105 |
| rs11930213 | 1 | 1 | 1 | 1 |   | 4  | 141341951 |
| rs11937276 |   | 1 |   | 1 |   | 4  | 25650833  |
| rs1194039  | 1 | 1 |   |   | 1 | 12 | 125828525 |
| rs11940490 | 1 | 1 | 1 | 1 |   | 4  | 84548374  |
| rs11957757 | 1 | 1 |   |   | 1 | 5  | 148196380 |
| rs11966566 | 1 | 1 | 1 | 1 |   | 6  | 154648709 |
| rs1197701  | 1 | 1 | 1 | 1 |   | 15 | 39974784  |
| rs1198823  | 1 | 1 | 1 | 1 |   | 2  | 238424857 |
| rs11988550 | 1 | 1 | 1 | 1 |   | 8  | 143387428 |
| rs11989824 |   | 1 |   | 1 |   | 8  | 72812394  |
| rs11991112 | 1 | 1 | 1 | 1 |   | 8  | 110703173 |
| rs11993990 | 1 | 1 |   |   | 1 | 8  | 21601012  |
| rs11995144 | 1 | 1 | 1 | 1 |   | 8  | 79958892  |
| rs11996715 |   | 1 |   | 1 |   | 8  | 141716473 |
| rs11997161 |   | 1 |   | 1 |   | 8  | 141807769 |
| rs12001    | 1 | 1 |   |   | 1 | 9  | 97677251  |
| rs12018676 | 1 | 1 | 1 | 1 |   | 13 | 90289722  |
| rs12019515 |   | 1 |   | 1 |   | 13 | 93807263  |
| rs12021671 | 1 | 1 | 1 | 1 |   | 1  | 205724768 |
| rs12024651 | 1 | 1 | 1 | 1 |   | 1  | 107206454 |
| rs12030971 | 1 | 1 | 1 | 1 |   | 1  | 69203851  |
| rs1203766  |   | 1 |   | 1 |   | 4  | 2406055   |
| rs12040961 | 1 | 1 | 1 | 1 |   | 1  | 67836216  |
| rs12046258 | 1 | 1 |   |   | 1 | 1  | 202305783 |
| rs12046602 | 1 | 1 | 1 | 1 | 1 | 1  | 105460586 |
| rs12050395 | 1 | 1 | 1 | 1 |   | 14 | 85280257  |
| rs12052847 | 1 | 1 |   |   | 1 | 2  | 68919581  |
| rs12061503 | 1 | 1 | 1 | 1 | 1 | 1  | 101615842 |
| rs12064002 | 1 | 1 | 1 | 1 |   | 1  | 81118208  |
| rs12065099 | 1 | 1 | 1 | 1 |   | 1  | 65668896  |
| rs1206882  |   | 1 |   | 1 |   | 20 | 45580973  |
| rs12083651 | 1 | 1 | 1 | 1 |   | 1  | 231257062 |
| rs12091966 | 1 | 1 | 1 | 1 |   | 1  | 229309834 |
| rs12094260 | 1 | 1 | 1 | 1 |   | 1  | 106608837 |
| rs12103381 | 1 | 1 | 1 | 1 |   | 16 | 62341057  |
| rs12111723 | 1 | 1 | 1 | 1 |   | 7  | 17580072  |
| rs12124147 | 1 | 1 | 1 | 1 | 1 | 1  | 3124191   |
| rs12127377 | 1 | 1 | 1 | 1 |   | 1  | 114291496 |
| rs12128497 |   | 1 |   | 1 |   | 1  | 73150625  |
| rs12129709 | 1 | 1 | 1 | 1 |   | 1  | 65229411  |
| rs121318   | 1 | 1 | 1 | 1 |   | 18 | 53206453  |
| rs12132550 | 1 | 1 | 1 | 1 |   | 1  | 231601238 |
| rs12134299 | 1 | 1 | 1 | 1 |   | 1  | 51553799  |
| rs12138326 | 1 | 1 | 1 | 1 |   | 1  | 14718046  |
| rs12138504 | 1 | 1 |   |   | 1 | 1  | 42357695  |
| rs12139950 |   | 1 |   | 1 |   | 1  | 73732467  |

|            |   |   |   |   |   |    |           |
|------------|---|---|---|---|---|----|-----------|
| rs12147817 | 1 | 1 |   |   | 1 | 14 | 48465623  |
| rs12149783 | 1 | 1 | 1 | 1 |   | 16 | 7399524   |
| rs1215451  | 1 | 1 |   |   | 1 | 13 | 79613894  |
| rs12156272 | 1 | 1 | 1 | 1 |   | 8  | 132041682 |
| rs12156286 | 1 | 1 | 1 | 1 |   | 8  | 39581928  |
| rs1215988  |   | 1 |   | 1 |   | 9  | 132322376 |
| rs12186184 | 1 | 1 | 1 | 1 | 1 | 4  | 40992187  |
| rs12188192 | 1 | 1 |   |   | 1 | 5  | 136380739 |
| rs12190656 | 1 | 1 |   |   | 1 | 6  | 143178881 |
| rs12191488 | 1 | 1 | 1 | 1 |   | 6  | 74322596  |
| rs12193402 | 1 | 1 | 1 | 1 |   | 6  | 52393791  |
| rs12198061 | 1 | 1 | 1 | 1 |   | 6  | 86607704  |
| rs12199314 | 1 | 1 | 1 | 1 |   | 6  | 161504373 |
| rs12202888 | 1 | 1 | 1 | 1 |   | 6  | 49284637  |
| rs12203592 | 1 | 1 | 1 | 1 |   | 6  | 341321    |
| rs12205218 | 1 | 1 |   |   | 1 | 6  | 149542457 |
| rs12208090 |   | 1 |   | 1 |   | 6  | 54673803  |
| rs12208647 | 1 | 1 | 1 | 1 |   | 6  | 38516201  |
| rs12222255 |   | 1 |   | 1 |   | 11 | 131218727 |
| rs12229047 | 1 | 1 | 1 | 1 |   | 12 | 26437085  |
| rs12231308 | 1 | 1 | 1 | 1 | 1 | 12 | 96041305  |
| rs12247354 | 1 | 1 | 1 | 1 |   | 10 | 131326551 |
| rs12249391 |   | 1 |   | 1 |   | 10 | 9677953   |
| rs1227131  | 1 | 1 | 1 | 1 | 1 | 2  | 168121044 |
| rs12273605 | 1 | 1 | 1 | 1 |   | 11 | 124680691 |
| rs1227463  | 1 | 1 |   | 1 | 1 | 9  | 23172825  |
| rs12275853 | 1 | 1 | 1 | 1 |   | 11 | 25270610  |
| rs12278238 |   | 1 |   | 1 |   | 11 | 28018835  |
| rs12279152 | 1 | 1 | 1 | 1 |   | 11 | 133861485 |
| rs1230313  | 1 | 1 | 1 | 1 |   | 19 | 22467258  |
| rs12310416 |   | 1 |   | 1 |   | 12 | 7803942   |
| rs12310655 |   | 1 |   | 1 |   | 12 | 102152521 |
| rs12314080 | 1 | 1 | 1 | 1 |   | 12 | 39957915  |
| rs12319392 | 1 | 1 | 1 | 1 |   | 12 | 6040747   |
| rs12321903 | 1 | 1 |   |   | 1 | 12 | 98255115  |
| rs12323631 |   | 1 |   | 1 |   | 14 | 50318640  |
| rs12326860 |   | 1 |   | 1 |   | 18 | 27742802  |
| rs12327342 | 1 | 1 | 1 | 1 |   | 18 | 53457158  |
| rs12327639 | 1 | 1 | 1 | 1 |   | 19 | 57758669  |
| rs12330894 |   | 1 |   | 1 |   | 3  | 152854479 |
| rs1233757  | 1 | 1 |   |   | 1 | 20 | 15502640  |
| rs12343206 | 1 | 1 | 1 | 1 |   | 9  | 126223888 |
| rs12343952 |   | 1 |   | 1 |   | 9  | 121525949 |
| rs12345503 | 1 | 1 | 1 | 1 |   | 9  | 81678253  |
| rs12359135 | 1 | 1 | 1 | 1 |   | 10 | 94833525  |
| rs12360087 | 1 | 1 | 1 | 1 |   | 10 | 76043910  |
| rs12361502 | 1 | 1 | 1 | 1 |   | 11 | 13899425  |
| rs12363937 | 1 | 1 | 1 | 1 |   | 11 | 83254108  |
| rs12370505 | 1 | 1 | 1 | 1 | 1 | 12 | 32981222  |
| rs12372697 | 1 | 1 | 1 | 1 |   | 12 | 92853652  |
| rs12373064 |   | 1 |   | 1 |   | 16 | 69987425  |
| rs12374480 | 1 | 1 |   |   | 1 | 5  | 153981367 |

|            |   |   |   |   |   |    |           |
|------------|---|---|---|---|---|----|-----------|
| rs12377016 | 1 | 1 | 1 | 1 |   | 9  | 83563248  |
| rs12404243 |   | 1 |   | 1 |   | 1  | 195129192 |
| rs12404676 | 1 | 1 | 1 | 1 |   | 1  | 163298870 |
| rs12407446 | 1 | 1 | 1 | 1 |   | 1  | 156503686 |
| rs12407548 | 1 | 1 |   |   | 1 | 1  | 104533350 |
| rs12409743 |   | 1 |   | 1 |   | 1  | 87397886  |
| rs12420530 |   | 1 |   | 1 |   | 11 | 119412815 |
| rs1242094  |   | 1 |   | 1 |   | 14 | 92285999  |
| rs12424735 | 1 | 1 | 1 | 1 |   | 12 | 34565140  |
| rs1242551  | 1 | 1 | 1 | 1 |   | 14 | 82281556  |
| rs12427378 | 1 | 1 | 1 | 1 |   | 12 | 49360466  |
| rs12439719 |   | 1 |   | 1 |   | 15 | 59965987  |
| rs1243974  | 1 | 1 | 1 | 1 |   | 10 | 8218558   |
| rs12440104 | 1 | 1 | 1 | 1 |   | 15 | 71440062  |
| rs12446160 | 1 | 1 | 1 | 1 | 1 | 16 | 46915869  |
| rs12452093 | 1 | 1 | 1 | 1 |   | 17 | 29114217  |
| rs12456560 |   | 1 |   | 1 |   | 18 | 2585443   |
| rs12458009 |   | 1 |   | 1 |   | 18 | 57501487  |
| rs12459996 | 1 | 1 |   |   | 1 | 19 | 46448746  |
| rs12466364 |   | 1 |   | 1 |   | 2  | 203934576 |
| rs12469892 | 1 | 1 | 1 | 1 |   | 2  | 102262216 |
| rs12472063 | 1 | 1 |   |   | 1 | 2  | 7907665   |
| rs12472133 | 1 | 1 | 1 | 1 |   | 2  | 158473276 |
| rs12472540 | 1 | 1 |   |   | 1 | 2  | 175283895 |
| rs12478048 | 1 | 1 |   |   | 1 | 2  | 230616098 |
| rs12482075 |   | 1 |   | 1 |   | 21 | 37881096  |
| rs12488465 | 1 | 1 | 1 | 1 |   | 3  | 193394497 |
| rs12492695 | 1 | 1 | 1 | 1 |   | 3  | 122777805 |
| rs12501359 | 1 | 1 | 1 | 1 |   | 4  | 20970799  |
| rs12501393 |   | 1 |   | 1 |   | 4  | 70281752  |
| rs12504106 | 1 | 1 | 1 | 1 |   | 4  | 154140029 |
| rs12508689 | 1 | 1 | 1 | 1 |   | 4  | 121066869 |
| rs12508843 | 1 | 1 | 1 | 1 |   | 4  | 120097242 |
| rs12514417 | 1 | 1 |   |   | 1 | 5  | 125915614 |
| rs12515962 | 1 | 1 |   |   | 1 | 5  | 166119459 |
| rs12517159 | 1 | 1 | 1 | 1 |   | 5  | 19719373  |
| rs12524885 | 1 | 1 | 1 | 1 | 1 | 6  | 45944047  |
| rs12533837 | 1 | 1 | 1 | 1 |   | 7  | 42458965  |
| rs12534836 |   | 1 |   | 1 |   | 7  | 20212208  |
| rs12538916 | 1 | 1 | 1 | 1 |   | 7  | 100964807 |
| rs12544783 |   | 1 |   | 1 |   | 8  | 19074617  |
| rs12548107 | 1 | 1 | 1 | 1 | 1 | 8  | 27113796  |
| rs12554199 | 1 | 1 | 1 | 1 |   | 9  | 91437729  |
| rs1256992  | 1 | 1 | 1 | 1 |   | 2  | 97032759  |
| rs12570141 | 1 | 1 | 1 | 1 |   | 10 | 122438883 |
| rs12572781 | 1 | 1 |   |   | 1 | 10 | 16523087  |
| rs12594273 | 1 | 1 |   |   | 1 | 15 | 21767963  |
| rs12594777 | 1 | 1 | 1 | 1 |   | 15 | 30727238  |
| rs12596290 | 1 | 1 | 1 | 1 |   | 16 | 12540409  |
| rs12602160 | 1 | 1 |   |   | 1 | 17 | 52712433  |
| rs12604451 | 1 | 1 |   |   | 1 | 18 | 20013591  |
| rs12605976 |   | 1 |   | 1 |   | 18 | 59800150  |

|            |   |   |   |   |   |    |           |
|------------|---|---|---|---|---|----|-----------|
| rs12608210 | 1 | 1 | 1 | 1 |   | 18 | 20747882  |
| rs12618502 | 1 | 1 | 1 | 1 |   | 2  | 151518027 |
| rs12620484 |   | 1 |   | 1 |   | 2  | 69772446  |
| rs12621435 | 1 | 1 | 1 | 1 |   | 2  | 76747364  |
| rs12623642 | 1 | 1 |   |   | 1 | 2  | 26529899  |
| rs12624715 | 1 | 1 |   |   | 1 | 20 | 30689016  |
| rs12626954 | 1 | 1 | 1 | 1 |   | 21 | 43691341  |
| rs126280   | 1 | 1 | 1 | 1 |   | 1  | 208086447 |
| rs12633242 | 1 | 1 |   |   | 1 | 3  | 170458089 |
| rs12633569 | 1 | 1 | 1 | 1 |   | 3  | 156101213 |
| rs12634613 | 1 | 1 | 1 | 1 |   | 3  | 158466910 |
| rs12635682 | 1 | 1 | 1 | 1 | 1 | 3  | 182006802 |
| rs12642133 | 1 | 1 | 1 | 1 |   | 4  | 75762313  |
| rs12643434 | 1 | 1 | 1 | 1 |   | 4  | 84163084  |
| rs12645288 | 1 | 1 | 1 | 1 |   | 4  | 183212068 |
| rs12646895 | 1 | 1 | 1 | 1 |   | 4  | 62298775  |
| rs12647859 | 1 | 1 | 1 | 1 |   | 4  | 91449602  |
| rs1265203  | 1 | 1 | 1 | 1 |   | 6  | 4323996   |
| rs12659667 | 1 | 1 | 1 | 1 |   | 5  | 49897682  |
| rs12662237 |   | 1 |   | 1 |   | 6  | 148150583 |
| rs12662987 | 1 | 1 | 1 | 1 |   | 6  | 154860721 |
| rs12666311 | 1 | 1 |   |   | 1 | 7  | 48681055  |
| rs12669805 | 1 | 1 | 1 | 1 |   | 7  | 79509055  |
| rs1267472  | 1 | 1 | 1 | 1 |   | 11 | 34290400  |
| rs12677340 | 1 | 1 | 1 | 1 |   | 8  | 106058438 |
| rs12677633 | 1 | 1 | 1 | 1 |   | 8  | 33992280  |
| rs12678522 |   | 1 |   | 1 |   | 8  | 135823093 |
| rs12679254 |   | 1 |   | 1 |   | 8  | 74436745  |
| rs12679346 |   | 1 |   | 1 |   | 8  | 34188001  |
| rs12691565 | 1 | 1 | 1 | 1 |   | 2  | 141249126 |
| rs12705332 | 1 | 1 |   |   | 1 | 7  | 105498561 |
| rs12705973 | 1 | 1 | 1 | 1 | 1 | 7  | 114100435 |
| rs12706465 | 1 | 1 | 1 | 1 |   | 7  | 122451142 |
| rs12706793 | 1 | 1 | 1 | 1 | 1 | 7  | 126859376 |
| rs12710641 |   | 1 |   | 1 |   | 2  | 17343436  |
| rs12710777 | 1 | 1 | 1 | 1 |   | 4  | 35534319  |
| rs12724673 | 1 | 1 |   |   | 1 | 1  | 101756396 |
| rs12731666 | 1 | 1 | 1 | 1 |   | 1  | 12447239  |
| rs12741781 | 1 | 1 |   |   | 1 | 1  | 241494775 |
| rs12743521 | 1 | 1 | 1 | 1 |   | 1  | 220167571 |
| rs12743653 | 1 | 1 |   |   | 1 | 1  | 224222732 |
| rs12754000 |   | 1 |   | 1 |   | 1  | 15186707  |
| rs12758138 | 1 | 1 | 1 | 1 | 1 | 1  | 81002601  |
| rs1276535  |   | 1 |   | 1 |   | 6  | 112989635 |
| rs12796185 | 1 | 1 | 1 | 1 |   | 11 | 119952040 |
| rs12804561 | 1 | 1 | 1 | 1 | 1 | 11 | 62673153  |
| rs12806262 |   | 1 |   | 1 |   | 11 | 7466485   |
| rs12867481 | 1 | 1 | 1 | 1 |   | 13 | 92096524  |
| rs12874003 | 1 | 1 | 1 | 1 |   | 13 | 109749316 |
| rs12883861 | 1 | 1 |   |   | 1 | 14 | 26790295  |
| rs12885166 | 1 | 1 | 1 | 1 |   | 14 | 92195035  |
| rs1288709  | 1 | 1 | 1 | 1 |   | 14 | 87291337  |

|            |   |   |   |   |   |    |           |
|------------|---|---|---|---|---|----|-----------|
| rs12906896 | 1 | 1 | 1 | 1 |   | 15 | 32893860  |
| rs129074   | 1 | 1 | 1 | 1 |   | 11 | 2690701   |
| rs12910334 | 1 | 1 | 1 | 1 |   | 15 | 82749322  |
| rs12910436 | 1 | 1 |   |   | 1 | 15 | 86710141  |
| rs12919626 |   | 1 |   | 1 |   | 16 | 73313431  |
| rs12923978 | 1 | 1 | 1 | 1 |   | 16 | 84503825  |
| rs1292504  | 1 | 1 |   |   | 1 | 11 | 73947278  |
| rs12939848 | 1 | 1 | 1 | 1 | 1 | 17 | 62801270  |
| rs1294875  | 1 | 1 | 1 | 1 |   | 7  | 45217968  |
| rs12961378 | 1 | 1 | 1 | 1 |   | 18 | 40923585  |
| rs1297111  |   | 1 |   | 1 |   | 15 | 55551913  |
| rs12976546 |   | 1 |   | 1 |   | 19 | 36710123  |
| rs12993717 | 1 | 1 | 1 | 1 |   | 2  | 195184287 |
| rs12994681 | 1 | 1 | 1 | 1 |   | 2  | 126428086 |
| rs1299735  | 1 | 1 | 1 | 1 |   | 15 | 70900743  |
| rs12997609 | 1 | 1 | 1 | 1 |   | 2  | 146687885 |
| rs12999390 | 1 | 1 |   |   | 1 | 2  | 176228437 |
| rs13015810 |   | 1 |   | 1 |   | 2  | 170708722 |
| rs13020203 | 1 | 1 | 1 | 1 |   | 2  | 67432584  |
| rs13028218 |   | 1 |   | 1 |   | 2  | 8182948   |
| rs13032261 | 1 | 1 | 1 | 1 |   | 2  | 226976835 |
| rs13032262 | 1 | 1 | 1 | 1 | 1 | 2  | 25499825  |
| rs13032535 | 1 | 1 | 1 | 1 | 1 | 2  | 75728825  |
| rs13034680 | 1 | 1 | 1 | 1 |   | 2  | 19298827  |
| rs130539   | 1 | 1 | 1 | 1 |   | 22 | 31506450  |
| rs13059876 | 1 | 1 | 1 | 1 |   | 3  | 100880846 |
| rs13064710 |   | 1 |   | 1 |   | 3  | 24877946  |
| rs13065371 |   | 1 |   | 1 |   | 3  | 60734894  |
| rs13067639 |   | 1 |   | 1 |   | 3  | 136500760 |
| rs13068538 | 1 | 1 | 1 | 1 |   | 3  | 22894710  |
| rs13071295 | 1 | 1 | 1 | 1 |   | 3  | 125828673 |
| rs13071953 | 1 | 1 | 1 | 1 |   | 3  | 95221384  |
| rs1307298  |   | 1 |   | 1 |   | 14 | 94943075  |
| rs13073932 |   | 1 |   | 1 |   | 3  | 66557177  |
| rs13078644 | 1 | 1 |   |   | 1 | 3  | 17177338  |
| rs13082867 |   | 1 |   | 1 |   | 3  | 76001559  |
| rs13096852 | 1 | 1 | 1 | 1 |   | 3  | 101392332 |
| rs13099050 | 1 | 1 |   |   | 1 | 3  | 21028194  |
| rs13106298 | 1 | 1 | 1 | 1 |   | 4  | 179614507 |
| rs13112901 | 1 | 1 |   |   | 1 | 4  | 13396375  |
| rs13116880 | 1 | 1 |   |   | 1 | 4  | 54654762  |
| rs13131273 | 1 | 1 |   |   | 1 | 4  | 17091691  |
| rs13132286 | 1 | 1 | 1 | 1 | 1 | 4  | 20972739  |
| rs13137221 | 1 | 1 | 1 | 1 |   | 4  | 63216279  |
| rs13143572 | 1 | 1 | 1 | 1 |   | 4  | 178142569 |
| rs1316861  |   | 1 |   | 1 |   | 4  | 23586876  |
| rs1316883  | 1 | 1 | 1 | 1 |   | 1  | 223067267 |
| rs1317008  | 1 | 1 | 1 | 1 |   | 10 | 84139270  |
| rs13182055 | 1 | 1 | 1 | 1 |   | 5  | 26444063  |
| rs13194998 | 1 | 1 | 1 | 1 |   | 6  | 76585158  |
| rs13200910 | 1 | 1 | 1 | 1 |   | 6  | 90850197  |
| rs1320205  | 1 | 1 | 1 | 1 | 1 | 15 | 68037936  |

|            |   |   |   |   |   |    |           |
|------------|---|---|---|---|---|----|-----------|
| rs13212155 |   | 1 |   | 1 |   | 6  | 75355033  |
| rs13217057 | 1 | 1 | 1 | 1 |   | 6  | 91455862  |
| rs13221118 | 1 | 1 | 1 | 1 |   | 7  | 156493383 |
| rs13221445 | 1 | 1 | 1 | 1 |   | 7  | 3560091   |
| rs13225753 | 1 | 1 | 1 | 1 |   | 7  | 81996459  |
| rs13225983 | 1 | 1 | 1 | 1 |   | 7  | 6545106   |
| rs1322780  | 1 | 1 | 1 | 1 | 1 | 1  | 172132209 |
| rs13230321 | 1 | 1 | 1 | 1 |   | 7  | 86297283  |
| rs1323998  | 1 | 1 | 1 | 1 |   | 13 | 92736911  |
| rs1324322  | 1 | 1 | 1 | 1 | 1 | 10 | 10612757  |
| rs1324796  | 1 | 1 |   |   | 1 | 13 | 77762737  |
| rs1325156  | 1 | 1 | 1 | 1 |   | 19 | 59908762  |
| rs1325172  | 1 | 1 | 1 | 1 | 1 | 10 | 114348545 |
| rs13253335 |   | 1 |   | 1 |   | 8  | 40871053  |
| rs13268649 | 1 | 1 | 1 | 1 |   | 8  | 96822252  |
| rs13273386 | 1 | 1 | 1 | 1 | 1 | 8  | 35765533  |
| rs1327837  | 1 | 1 | 1 | 1 |   | 9  | 76473709  |
| rs13281284 | 1 | 1 | 1 | 1 |   | 8  | 70613856  |
| rs1328134  | 1 | 1 | 1 | 1 |   | 6  | 9817926   |
| rs13282976 | 1 | 1 |   |   | 1 | 8  | 84592073  |
| rs1328542  |   | 1 |   | 1 |   | 3  | 18457562  |
| rs13291498 | 1 | 1 |   |   | 1 | 9  | 28326185  |
| rs13295839 | 1 | 1 | 1 | 1 |   | 9  | 113679228 |
| rs133074   | 1 | 1 | 1 | 1 |   | 22 | 39408419  |
| rs1330864  | 1 | 1 |   |   | 1 | 1  | 87495553  |
| rs13322103 | 1 | 1 | 1 | 1 |   | 3  | 90211493  |
| rs1333592  | 1 | 1 | 1 | 1 |   | 13 | 82096952  |
| rs1333657  | 1 | 1 |   |   | 1 | 6  | 10404322  |
| rs13338194 | 1 | 1 |   |   | 1 | 16 | 67761735  |
| rs1334804  | 1 | 1 | 1 | 1 | 1 | 1  | 37167831  |
| rs1334811  | 1 | 1 | 1 | 1 |   | 9  | 27180655  |
| rs13353646 | 1 | 1 |   |   | 1 | 4  | 52756152  |
| rs13379032 | 1 | 1 | 1 | 1 | 1 | 13 | 64358918  |
| rs1338219  | 1 | 1 |   |   | 1 | 1  | 217864298 |
| rs1339287  | 1 | 1 | 1 | 1 |   | 9  | 8223804   |
| rs13395560 | 1 | 1 | 1 | 1 |   | 2  | 207227055 |
| rs1342602  | 1 | 1 |   |   | 1 | 13 | 82782349  |
| rs1342744  | 1 | 1 | 1 | 1 |   | 6  | 16160498  |
| rs13430738 | 1 | 1 | 1 | 1 |   | 2  | 98205799  |
| rs1343227  | 1 | 1 | 1 | 1 |   | 6  | 72674376  |
| rs13436458 | 1 | 1 |   |   | 1 | 5  | 30300247  |
| rs1343921  | 1 | 1 | 1 | 1 | 1 | 4  | 90166485  |
| rs13439619 | 1 | 1 | 1 | 1 |   | 8  | 122017725 |
| rs1345941  | 1 | 1 | 1 | 1 |   | 2  | 57289082  |
| rs1346017  |   | 1 |   | 1 |   | 3  | 191632893 |
| rs1346111  | 1 | 1 | 1 | 1 |   | 7  | 49713005  |
| rs1347155  | 1 | 1 |   |   | 1 | 5  | 171901953 |
| rs134774   |   | 1 |   | 1 |   | 22 | 49427626  |
| rs1348247  | 1 | 1 | 1 | 1 |   | 3  | 42355332  |
| rs1348338  | 1 | 1 | 1 | 1 |   | 18 | 26364571  |
| rs1351510  | 1 | 1 |   |   | 1 | 8  | 32223600  |
| rs1353473  | 1 | 1 | 1 | 1 |   | 4  | 121754743 |

|           |   |   |   |   |   |    |           |
|-----------|---|---|---|---|---|----|-----------|
| rs1354156 |   | 1 |   | 1 |   | 12 | 113619813 |
| rs1354369 |   | 1 |   | 1 |   | 1  | 193082712 |
| rs1355095 | 1 | 1 |   |   | 1 | 5  | 131276668 |
| rs135551  | 1 | 1 | 1 | 1 |   | 22 | 44931685  |
| rs1355829 | 1 | 1 | 1 | 1 |   | 18 | 35696875  |
| rs1356258 |   | 1 |   | 1 |   | 3  | 150062376 |
| rs1357337 | 1 | 1 |   |   | 1 | 1  | 174197560 |
| rs1360646 | 1 | 1 | 1 | 1 |   | 13 | 55167399  |
| rs1361168 | 1 | 1 | 1 | 1 |   | 6  | 101976888 |
| rs136223  | 1 | 1 |   |   | 1 | 22 | 29549869  |
| rs1362330 | 1 | 1 |   |   | 1 | 16 | 6517414   |
| rs1363396 | 1 | 1 |   |   | 1 | 5  | 120662944 |
| rs1363926 | 1 | 1 | 1 | 1 |   | 5  | 37928482  |
| rs1364215 |   | 1 |   | 1 |   | 16 | 63455370  |
| rs1364616 |   | 1 |   | 1 |   | 8  | 72728798  |
| rs1365796 |   | 1 |   | 1 |   | 14 | 58352052  |
| rs1368406 | 1 | 1 | 1 | 1 |   | 5  | 170839889 |
| rs1368926 | 1 | 1 |   |   | 1 | 2  | 8668828   |
| rs1369256 | 1 | 1 | 1 | 1 |   | 2  | 153702054 |
| rs1370031 | 1 | 1 | 1 | 1 |   | 3  | 156289341 |
| rs1370894 | 1 | 1 |   |   | 1 | 3  | 81166551  |
| rs137296  | 1 | 1 | 1 | 1 |   | 22 | 31830311  |
| rs1373865 |   | 1 |   | 1 |   | 8  | 72457868  |
| rs1373967 | 1 | 1 | 1 | 1 | 1 | 5  | 80252312  |
| rs1374111 |   | 1 |   | 1 |   | 2  | 137150372 |
| rs137684  | 1 | 1 | 1 | 1 |   | 22 | 38068671  |
| rs1377554 | 1 | 1 | 1 | 1 |   | 16 | 16848739  |
| rs1377892 |   | 1 |   | 1 |   | 4  | 31967272  |
| rs1379034 | 1 | 1 | 1 | 1 |   | 2  | 40918328  |
| rs1379411 | 1 | 1 | 1 | 1 |   | 4  | 180431771 |
| rs1380410 |   | 1 |   | 1 |   | 12 | 83541267  |
| rs1381356 |   | 1 |   | 1 |   | 3  | 111449459 |
| rs138312  |   | 1 |   | 1 |   | 22 | 39532082  |
| rs1383978 | 1 | 1 | 1 | 1 |   | 8  | 72174885  |
| rs1387091 | 1 | 1 | 1 | 1 |   | 3  | 1963126   |
| rs1387329 | 1 | 1 | 1 | 1 |   | 4  | 169537783 |
| rs1389037 | 1 | 1 | 1 | 1 | 1 | 4  | 45489650  |
| rs1390009 | 1 | 1 | 1 | 1 | 1 | 4  | 135151781 |
| rs1391062 |   | 1 |   | 1 |   | 3  | 131589084 |
| rs1391072 |   | 1 |   | 1 |   | 12 | 82584974  |
| rs1393509 | 1 | 1 |   |   | 1 | 2  | 82832076  |
| rs1393861 | 1 | 1 | 1 | 1 |   | 4  | 5378722   |
| rs1395407 | 1 | 1 |   |   | 1 | 3  | 27955318  |
| rs1396200 | 1 | 1 |   |   | 1 | 12 | 24505014  |
| rs1396500 | 1 | 1 | 1 | 1 |   | 5  | 54359712  |
| rs139684  | 1 | 1 |   |   | 1 | 22 | 23582510  |
| rs1398553 | 1 | 1 | 1 | 1 |   | 4  | 123767518 |
| rs1398589 | 1 | 1 | 1 | 1 |   | 12 | 17202343  |
| rs1399613 |   | 1 |   | 1 |   | 3  | 190552104 |
| rs1401108 |   | 1 |   | 1 |   | 2  | 180700025 |
| rs140129  | 1 | 1 |   |   | 1 | 22 | 28480549  |
| rs1401618 | 1 | 1 | 1 | 1 |   | 11 | 23604116  |

|           |   |   |   |   |   |    |           |
|-----------|---|---|---|---|---|----|-----------|
| rs1404020 | 1 | 1 |   |   | 1 | 1  | 105882130 |
| rs1404707 |   | 1 |   | 1 |   | 7  | 146615716 |
| rs1404912 | 1 | 1 |   |   | 1 | 7  | 45531364  |
| rs1404945 | 1 | 1 |   |   | 1 | 7  | 13625879  |
| rs1405134 | 1 | 1 | 1 | 1 |   | 2  | 235165740 |
| rs1405187 |   | 1 |   | 1 |   | 17 | 47260598  |
| rs1407297 |   | 1 |   | 1 |   | 9  | 35837756  |
| rs1408811 | 1 | 1 | 1 | 1 |   | 9  | 12565421  |
| rs1409779 | 1 | 1 | 1 | 1 |   | 1  | 197701830 |
| rs1410594 | 1 | 1 | 1 | 1 |   | 1  | 177849788 |
| rs1412832 |   | 1 |   | 1 |   | 9  | 22067543  |
| rs1413279 | 1 | 1 | 1 | 1 |   | 13 | 87534745  |
| rs1413710 | 1 | 1 | 1 | 1 |   | 10 | 72016477  |
| rs1417296 | 1 | 1 |   |   | 1 | 1  | 85009365  |
| rs1417907 | 1 | 1 |   |   | 1 | 13 | 107144507 |
| rs1419074 | 1 | 1 | 1 | 1 | 1 | 1  | 163286625 |
| rs1419391 |   | 1 |   | 1 |   | 7  | 126711989 |
| rs1420109 | 1 | 1 | 1 | 1 |   | 7  | 29555445  |
| rs1422525 | 1 | 1 | 1 | 1 |   | 5  | 166741993 |
| rs1422802 | 1 | 1 |   |   | 1 | 5  | 128517352 |
| rs1422908 | 1 | 1 |   |   | 1 | 5  | 174613016 |
| rs1423089 | 1 | 1 | 1 | 1 |   | 19 | 12450726  |
| rs1423626 | 1 | 1 |   |   | 1 | 5  | 87161050  |
| rs1424341 | 1 | 1 | 1 | 1 |   | 2  | 222392192 |
| rs1425021 |   | 1 |   | 1 |   | 2  | 34166507  |
| rs1426449 | 1 | 1 | 1 | 1 |   | 12 | 112550465 |
| rs1427106 | 1 | 1 | 1 | 1 |   | 3  | 164484660 |
| rs1428530 | 1 | 1 | 1 | 1 |   | 5  | 7678795   |
| rs1430859 | 1 | 1 | 1 | 1 |   | 11 | 94105303  |
| rs1432053 | 1 | 1 | 1 | 1 |   | 11 | 82937768  |
| rs1435442 | 1 | 1 | 1 | 1 | 1 | 4  | 185054196 |
| rs1435887 | 1 | 1 | 1 | 1 |   | 2  | 81481530  |
| rs1436450 |   | 1 |   | 1 |   | 9  | 79660701  |
| rs1437683 | 1 | 1 | 1 | 1 |   | 2  | 119015357 |
| rs1438131 | 1 | 1 | 1 | 1 | 1 | 2  | 23360287  |
| rs1438728 | 1 | 1 | 1 | 1 |   | 5  | 33469759  |
| rs1439494 |   | 1 |   | 1 |   | 18 | 34595317  |
| rs1440375 | 1 | 1 | 1 | 1 |   | 15 | 64836561  |
| rs1441355 |   | 1 |   | 1 |   | 15 | 69465232  |
| rs1442173 |   | 1 |   | 1 |   | 4  | 85513412  |
| rs1442828 | 1 | 1 |   |   | 1 | 17 | 52030451  |
| rs1443899 | 1 | 1 |   |   | 1 | 8  | 80009731  |
| rs1448488 | 1 | 1 | 1 | 1 |   | 15 | 25890452  |
| rs1448817 | 1 | 1 | 1 | 1 | 1 | 4  | 111860502 |
| rs1450878 | 1 | 1 | 1 | 1 |   | 7  | 129005009 |
| rs1451173 | 1 | 1 | 1 | 1 |   | 4  | 65929033  |
| rs1454149 | 1 | 1 | 1 | 1 |   | 3  | 177716649 |
| rs1455313 | 1 | 1 | 1 | 1 | 1 | 4  | 80340918  |
| rs1457869 |   | 1 |   | 1 |   | 18 | 29333616  |
| rs1458038 | 1 | 1 | 1 | 1 |   | 4  | 81383747  |
| rs1458647 | 1 | 1 |   |   | 1 | 4  | 84890251  |
| rs1462476 | 1 | 1 | 1 | 1 |   | 6  | 77572235  |

|           |   |   |   |   |   |    |           |
|-----------|---|---|---|---|---|----|-----------|
| rs1463242 | 1 | 1 | 1 | 1 |   | 16 | 6121852   |
| rs1464898 | 1 | 1 |   |   | 1 | 11 | 27991324  |
| rs1465010 | 1 | 1 | 1 | 1 |   | 3  | 54821369  |
| rs1465109 |   | 1 |   | 1 |   | 14 | 94415240  |
| rs1466835 | 1 | 1 | 1 | 1 |   | 3  | 12554944  |
| rs1467616 | 1 | 1 |   |   | 1 | 10 | 102631681 |
| rs1468329 | 1 | 1 | 1 | 1 |   | 17 | 61003783  |
| rs1468900 | 1 | 1 |   |   | 1 | 2  | 75303491  |
| rs1471678 |   | 1 |   | 1 |   | 8  | 63258876  |
| rs1471997 |   | 1 |   | 1 |   | 12 | 47009862  |
| rs1472147 | 1 | 1 | 1 | 1 |   | 7  | 128290779 |
| rs1475048 | 1 | 1 | 1 | 1 |   | 20 | 39712523  |
| rs1477569 | 1 | 1 | 1 | 1 | 1 | 11 | 25187356  |
| rs1477798 | 1 | 1 | 1 | 1 |   | 15 | 64239300  |
| rs1477921 | 1 | 1 |   |   | 1 | 13 | 105816154 |
| rs1482363 | 1 | 1 | 1 | 1 |   | 5  | 113170241 |
| rs1484680 |   | 1 |   | 1 |   | 2  | 22702188  |
| rs1486082 | 1 | 1 | 1 | 1 |   | 1  | 72301127  |
| rs1486731 | 1 | 1 | 1 | 1 |   | 16 | 53744492  |
| rs1491192 | 1 | 1 | 1 | 1 |   | 10 | 133792769 |
| rs1491610 | 1 | 1 | 1 | 1 |   | 3  | 70637214  |
| rs1492468 | 1 | 1 | 1 | 1 | 1 | 4  | 163249462 |
| rs1494428 | 1 | 1 |   |   | 1 | 1  | 164721426 |
| rs1495085 | 1 | 1 | 1 | 1 |   | 8  | 15342886  |
| rs1495712 |   | 1 |   | 1 |   | 4  | 177057259 |
| rs1495810 | 1 | 1 |   |   | 1 | 18 | 57160656  |
| rs1496292 | 1 | 1 | 1 | 1 |   | 11 | 10791724  |
| rs1498178 |   | 1 |   | 1 |   | 8  | 55965709  |
| rs1498273 |   | 1 |   | 1 |   | 10 | 4718091   |
| rs1498319 | 1 | 1 |   |   | 1 | 1  | 33456688  |
| rs149874  |   | 1 |   | 1 |   | 13 | 49854950  |
| rs1503766 | 1 | 1 |   |   | 1 | 8  | 135037683 |
| rs1504189 | 1 | 1 | 1 | 1 |   | 2  | 49133436  |
| rs1504530 |   | 1 |   | 1 |   | 5  | 99561548  |
| rs1505931 |   | 1 |   | 1 |   | 10 | 59250064  |
| rs1506149 | 1 | 1 | 1 | 1 |   | 4  | 127115771 |
| rs150710  | 1 | 1 | 1 | 1 |   | 2  | 33017353  |
| rs1507500 | 1 | 1 | 1 | 1 | 1 | 4  | 148213152 |
| rs1507599 | 1 | 1 | 1 | 1 |   | 7  | 86060195  |
| rs1507608 |   | 1 |   | 1 |   | 11 | 89709751  |
| rs150881  | 1 | 1 | 1 | 1 |   | 7  | 73227295  |
| rs1509718 |   | 1 |   | 1 |   | 11 | 108496783 |
| rs1510058 | 1 | 1 | 1 | 1 | 1 | 15 | 97672532  |
| rs1510889 | 1 | 1 |   |   | 1 | 12 | 77295462  |
| rs1512155 | 1 | 1 | 1 | 1 |   | 4  | 30070637  |
| rs1512565 |   | 1 |   | 1 |   | 12 | 28652202  |
| rs1512715 |   | 1 |   | 1 |   | 9  | 2555685   |
| rs1512970 | 1 | 1 |   |   | 1 | 4  | 123780517 |
| rs1518386 | 1 | 1 | 1 | 1 |   | 11 | 86624672  |
| rs1519820 |   | 1 |   | 1 |   | 15 | 76364262  |
| rs1519887 |   | 1 |   | 1 |   | 1  | 107145822 |
| rs1520186 | 1 | 1 | 1 | 1 |   | 12 | 102079494 |

|           |   |   |   |   |   |    |           |
|-----------|---|---|---|---|---|----|-----------|
| rs1522122 | 1 | 1 |   |   | 1 | 3  | 181311769 |
| rs1522679 | 1 | 1 | 1 | 1 |   | 11 | 37307404  |
| rs1523250 | 1 | 1 | 1 | 1 |   | 8  | 3789239   |
| rs1523344 |   | 1 |   | 1 |   | 3  | 174712468 |
| rs1523902 | 1 | 1 | 1 | 1 |   | 3  | 822139    |
| rs1524600 | 1 | 1 | 1 | 1 |   | 7  | 79976239  |
| rs1524966 | 1 | 1 |   |   | 1 | 3  | 65505873  |
| rs1526070 | 1 | 1 | 1 | 1 |   | 2  | 199491841 |
| rs1527575 | 1 | 1 |   |   | 1 | 7  | 155992032 |
| rs1527650 | 1 | 1 | 1 | 1 |   | 7  | 120030812 |
| rs1527757 | 1 | 1 | 1 | 1 |   | 2  | 156475079 |
| rs1528961 | 1 | 1 | 1 | 1 | 1 | 5  | 136821047 |
| rs1529121 |   | 1 |   | 1 |   | 2  | 180763842 |
| rs1531631 | 1 | 1 | 1 | 1 | 1 | 14 | 78694245  |
| rs1532684 |   | 1 |   | 1 |   | 3  | 193769957 |
| rs1532977 | 1 | 1 |   |   | 1 | 17 | 1109655   |
| rs1533019 | 1 | 1 | 1 | 1 | 1 | 5  | 59343570  |
| rs1535344 |   | 1 |   | 1 |   | 14 | 68268284  |
| rs1535721 | 1 | 1 |   |   | 1 | 11 | 34456655  |
| rs153645  | 1 | 1 | 1 | 1 |   | 5  | 115892477 |
| rs1538615 | 1 | 1 |   |   | 1 | 14 | 50483174  |
| rs1540052 |   | 1 |   | 1 |   | 4  | 103357000 |
| rs1541320 | 1 | 1 | 1 | 1 |   | 21 | 36436187  |
| rs1541335 | 1 | 1 | 1 | 1 |   | 7  | 93299112  |
| rs1541745 | 1 | 1 | 1 | 1 | 1 | 4  | 117710581 |
| rs1544908 | 1 | 1 | 1 | 1 |   | 1  | 55075307  |
| rs1545255 | 1 | 1 | 1 | 1 |   | 2  | 24592914  |
| rs1546833 |   | 1 |   | 1 |   | 7  | 38290215  |
| rs1546963 | 1 | 1 | 1 | 1 |   | 6  | 108132839 |
| rs1548029 |   | 1 |   | 1 |   | 19 | 51001043  |
| rs1548299 |   | 1 |   | 1 |   | 9  | 3640174   |
| rs1548353 | 1 | 1 | 1 | 1 | 1 | 8  | 17211136  |
| rs1550948 |   | 1 |   | 1 |   | 8  | 325646    |
| rs1551894 | 1 | 1 |   |   | 1 | 5  | 74606287  |
| rs1552046 | 1 | 1 | 1 | 1 | 1 | 19 | 5073051   |
| rs1552224 |   | 1 |   | 1 |   | 11 | 72110746  |
| rs1552626 | 1 | 1 | 1 | 1 |   | 3  | 67532920  |
| rs1552722 | 1 | 1 | 1 | 1 |   | 11 | 7028596   |
| rs1553255 | 1 | 1 | 1 | 1 |   | 2  | 196065116 |
| rs1553664 | 1 | 1 | 1 | 1 |   | 18 | 72420744  |
| rs1554690 | 1 | 1 | 1 | 1 |   | 7  | 145377266 |
| rs1554808 | 1 | 1 | 1 | 1 |   | 2  | 123373397 |
| rs1555961 | 1 | 1 |   |   | 1 | 10 | 7840814   |
| rs1557862 |   | 1 |   | 1 |   | 7  | 11263244  |
| rs1557996 | 1 | 1 |   |   | 1 | 7  | 7623829   |
| rs1558062 |   | 1 |   | 1 |   | 12 | 124819460 |
| rs1558160 | 1 | 1 | 1 | 1 |   | 7  | 39477255  |
| rs1558300 | 1 | 1 | 1 | 1 |   | 7  | 153030308 |
| rs1561162 | 1 | 1 |   |   | 1 | 3  | 87136015  |
| rs1561817 | 1 | 1 |   |   | 1 | 8  | 26591503  |
| rs1562622 |   | 1 |   | 1 |   | 2  | 6367347   |
| rs1564647 | 1 | 1 | 1 | 1 |   | 12 | 131919835 |

|            |   |   |   |   |   |    |           |
|------------|---|---|---|---|---|----|-----------|
| rs1566246  | 1 | 1 | 1 | 1 | 1 | 1  | 67017863  |
| rs1569339  | 1 | 1 |   |   | 1 | 8  | 116957644 |
| rs1570303  |   | 1 |   | 1 |   | 9  | 113440819 |
| rs1570442  | 1 | 1 | 1 | 1 |   | 1  | 192190317 |
| rs1571069  | 1 | 1 |   |   | 1 | 13 | 102271071 |
| rs1571176  | 1 | 1 | 1 | 1 |   | 10 | 93882133  |
| rs1572228  | 1 | 1 | 1 | 1 |   | 6  | 75285933  |
| rs157237   | 1 | 1 | 1 | 1 |   | 5  | 89425453  |
| rs1576758  |   | 1 |   | 1 |   | 9  | 82572063  |
| rs1582206  |   | 1 |   | 1 |   | 13 | 59735445  |
| rs1586059  | 1 | 1 | 1 | 1 |   | 1  | 186781768 |
| rs1593306  | 1 | 1 | 1 | 1 | 1 | 7  | 131264503 |
| rs1593705  | 1 | 1 |   |   | 1 | 2  | 49670038  |
| rs159525   | 1 | 1 | 1 | 1 |   | 1  | 26086578  |
| rs1596300  | 1 | 1 |   |   | 1 | 11 | 28538006  |
| rs159729   |   | 1 |   | 1 |   | 5  | 58217901  |
| rs1598859  | 1 | 1 | 1 | 1 |   | 4  | 103725482 |
| rs1604528  | 1 | 1 | 1 | 1 |   | 15 | 36005449  |
| rs160993   | 1 | 1 |   |   | 1 | 18 | 53510410  |
| rs1613866  | 1 | 1 | 1 | 1 |   | 6  | 165517894 |
| rs1657050  | 1 | 1 | 1 | 1 |   | 12 | 62913326  |
| rs1672376  | 1 | 1 | 1 | 1 |   | 3  | 103118744 |
| rs16750    | 1 | 1 | 1 | 1 |   | 5  | 159062555 |
| rs1678386  | 1 | 1 | 1 | 1 | 1 | 13 | 94647177  |
| rs1680394  |   | 1 |   | 1 |   | 3  | 66383237  |
| rs16825746 |   | 1 |   | 1 |   | 1  | 21831496  |
| rs168283   |   | 1 |   | 1 |   | 4  | 79453341  |
| rs16829231 | 1 | 1 | 1 | 1 | 1 | 2  | 134248092 |
| rs16839940 | 1 | 1 | 1 | 1 |   | 3  | 99760387  |
| rs16874127 | 1 | 1 | 1 | 1 |   | 5  | 76599527  |
| rs16876243 | 1 | 1 | 1 | 1 |   | 5  | 5825527   |
| rs16880382 | 1 | 1 | 1 | 1 |   | 5  | 8381125   |
| rs16881936 | 1 | 1 |   |   | 1 | 6  | 90322384  |
| rs16885    | 1 | 1 | 1 | 1 |   | 6  | 16414730  |
| rs1689803  | 1 | 1 | 1 | 1 |   | 1  | 180428452 |
| rs16900082 | 1 | 1 | 1 | 1 |   | 5  | 82320784  |
| rs16901689 | 1 | 1 | 1 | 1 |   | 5  | 11560368  |
| rs16906775 | 1 | 1 | 1 | 1 |   | 8  | 80409145  |
| rs16907003 | 1 | 1 | 1 | 1 |   | 10 | 56557144  |
| rs16910480 | 1 | 1 | 1 | 1 |   | 9  | 97904188  |
| rs1691983  | 1 | 1 |   |   | 1 | 3  | 41517346  |
| rs16928653 | 1 | 1 | 1 | 1 |   | 9  | 127884910 |
| rs16932027 | 1 | 1 | 1 | 1 |   | 9  | 116793927 |
| rs1693359  | 1 | 1 |   |   | 1 | 12 | 25130689  |
| rs1693521  | 1 | 1 |   |   | 1 | 15 | 50612099  |
| rs16936082 | 1 | 1 | 1 | 1 |   | 9  | 103628443 |
| rs16943315 | 1 | 1 | 1 | 1 |   | 16 | 86427141  |
| rs16943989 | 1 | 1 | 1 | 1 |   | 18 | 2882474   |
| rs16957064 | 1 | 1 | 1 | 1 |   | 15 | 70614105  |
| rs16966701 | 1 | 1 |   |   | 1 | 17 | 36753920  |
| rs1697143  | 1 | 1 | 1 | 1 |   | 5  | 66516825  |
| rs16972092 | 1 | 1 | 1 | 1 |   | 16 | 72112611  |

|            |   |   |   |   |   |    |           |
|------------|---|---|---|---|---|----|-----------|
| rs16987794 | 1 | 1 | 1 | 1 |   | 2  | 20612242  |
| rs16988358 | 1 | 1 | 1 | 1 |   | 20 | 37751909  |
| rs16997896 | 1 | 1 | 1 | 1 |   | 20 | 51346815  |
| rs16999738 | 1 | 1 | 1 | 1 |   | 21 | 40702268  |
| rs17006704 | 1 | 1 | 1 | 1 |   | 2  | 119278379 |
| rs17012485 | 1 | 1 | 1 | 1 |   | 2  | 76389267  |
| rs17019119 | 1 | 1 | 1 | 1 |   | 2  | 4467627   |
| rs17029408 | 1 | 1 | 1 | 1 |   | 2  | 42332554  |
| rs17034929 | 1 | 1 | 1 | 1 |   | 3  | 3665193   |
| rs17043135 | 1 | 1 | 1 | 1 |   | 3  | 17165593  |
| rs17043611 | 1 | 1 | 1 | 1 | 1 | 3  | 5824483   |
| rs17048973 | 1 | 1 | 1 | 1 |   | 4  | 118165736 |
| rs17055354 | 1 | 1 |   |   | 1 | 13 | 36811681  |
| rs17057633 | 1 | 1 | 1 | 1 |   | 13 | 59577372  |
| rs17069574 | 1 | 1 | 1 | 1 |   | 5  | 167368552 |
| rs17073403 |   | 1 |   | 1 |   | 13 | 21383899  |
| rs17079195 | 1 | 1 | 1 | 1 | 1 | 18 | 64288874  |
| rs17087830 | 1 | 1 | 1 | 1 |   | 4  | 57816425  |
| rs17088268 | 1 | 1 | 1 | 1 |   | 9  | 86949313  |
| rs17094362 | 1 | 1 |   |   | 1 | 1  | 74012802  |
| rs1711960  | 1 | 1 |   |   | 1 | 6  | 1362599   |
| rs17126387 | 1 | 1 | 1 | 1 | 1 | 14 | 89371067  |
| rs17134141 | 1 | 1 | 1 | 1 |   | 11 | 99033149  |
| rs17137472 |   | 1 |   | 1 |   | 7  | 17262597  |
| rs17141252 | 1 | 1 | 1 | 1 |   | 6  | 5711452   |
| rs17147532 | 1 | 1 |   |   | 1 | 4  | 70540493  |
| rs17158154 | 1 | 1 | 1 | 1 |   | 11 | 62876062  |
| rs17166207 | 1 | 1 | 1 | 1 |   | 7  | 131500521 |
| rs171718   | 1 | 1 | 1 | 1 | 1 | 5  | 171075771 |
| rs17173637 | 1 | 1 | 1 | 1 |   | 7  | 150160382 |
| rs17187133 | 1 | 1 | 1 | 1 |   | 1  | 206373103 |
| rs17189345 | 1 | 1 | 1 | 1 |   | 15 | 61936655  |
| rs1719976  | 1 | 1 | 1 | 1 |   | 18 | 5523188   |
| rs17210759 | 1 | 1 |   |   | 1 | 5  | 52147553  |
| rs17240415 | 1 | 1 |   |   | 1 | 18 | 64801868  |
| rs17242960 | 1 | 1 | 1 | 1 |   | 5  | 52755777  |
| rs17264096 | 1 | 1 | 1 | 1 |   | 18 | 70958244  |
| rs17271148 | 1 | 1 | 1 | 1 |   | 2  | 190110467 |
| rs17273267 | 1 | 1 | 1 | 1 |   | 19 | 59401140  |
| rs17277113 | 1 | 1 | 1 | 1 |   | 1  | 170400944 |
| rs172787   | 1 | 1 | 1 | 1 |   | 16 | 3173738   |
| rs17279118 | 1 | 1 | 1 | 1 |   | 8  | 131030946 |
| rs17293152 | 1 | 1 | 1 | 1 |   | 11 | 102138344 |
| rs17319408 | 1 | 1 | 1 | 1 |   | 1  | 225185535 |
| rs17325754 | 1 | 1 | 1 | 1 |   | 1  | 69978062  |
| rs17345167 | 1 | 1 |   |   | 1 | 2  | 54884527  |
| rs1735899  | 1 | 1 | 1 | 1 | 1 | 21 | 20734486  |
| rs17360053 | 1 | 1 |   |   | 1 | 1  | 22372117  |
| rs173686   | 1 | 1 | 1 | 1 | 1 | 5  | 82847256  |
| rs17384657 |   | 1 |   | 1 |   | 10 | 24661086  |
| rs174015   | 1 | 1 | 1 | 1 | 1 | 5  | 102159866 |
| rs17448763 | 1 | 1 | 1 | 1 |   | 10 | 17645017  |

|            |   |   |   |   |   |    |           |
|------------|---|---|---|---|---|----|-----------|
| rs17455729 | 1 | 1 | 1 | 1 |   | 2  | 10845701  |
| rs17461905 | 1 | 1 | 1 | 1 |   | 4  | 47063822  |
| rs17469847 | 1 | 1 | 1 | 1 |   | 6  | 130098274 |
| rs1748168  | 1 | 1 | 1 | 1 |   | 6  | 114955404 |
| rs17487804 | 1 | 1 | 1 | 1 |   | 16 | 63371745  |
| rs17495345 | 1 | 1 | 1 | 1 |   | 2  | 50121417  |
| rs17496703 | 1 | 1 | 1 | 1 | 1 | 19 | 36476435  |
| rs1749778  | 1 | 1 |   |   | 1 | 1  | 58236351  |
| rs17527048 | 1 | 1 | 1 | 1 |   | 14 | 24951684  |
| rs17537169 | 1 | 1 | 1 | 1 |   | 2  | 208426028 |
| rs17551120 | 1 | 1 | 1 | 1 | 1 | 6  | 147275677 |
| rs17556717 | 1 | 1 |   |   | 1 | 13 | 90826254  |
| rs1755833  | 1 | 1 | 1 | 1 |   | 6  | 57294253  |
| rs17567580 | 1 | 1 | 1 | 1 |   | 7  | 8022097   |
| rs17582975 | 1 | 1 |   |   | 1 | 18 | 8562792   |
| rs17583414 | 1 | 1 | 1 | 1 |   | 13 | 65996856  |
| rs17588412 | 1 | 1 |   |   | 1 | 4  | 166785076 |
| rs17590785 | 1 | 1 | 1 | 1 |   | 17 | 47345110  |
| rs17595617 | 1 | 1 | 1 | 1 |   | 2  | 59731763  |
| rs17600119 | 1 | 1 | 1 | 1 |   | 3  | 6403207   |
| rs1761972  | 1 | 1 | 1 | 1 |   | 10 | 29124652  |
| rs17624713 | 1 | 1 | 1 | 1 |   | 7  | 123253764 |
| rs17644378 | 1 | 1 |   |   | 1 | 13 | 73949875  |
| rs17646946 | 1 | 1 | 1 | 1 |   | 1  | 150329391 |
| rs17651643 | 1 | 1 | 1 | 1 |   | 5  | 16945438  |
| rs17660328 | 1 | 1 | 1 | 1 |   | 5  | 172273428 |
| rs17662791 |   | 1 |   | 1 |   | 14 | 51086033  |
| rs17669995 | 1 | 1 |   |   | 1 | 8  | 138379138 |
| rs17678742 | 1 | 1 |   |   | 1 | 2  | 21632198  |
| rs17680913 | 1 | 1 | 1 | 1 |   | 16 | 9192461   |
| rs17698283 | 1 | 1 | 1 | 1 |   | 1  | 239116998 |
| rs1770718  | 1 | 1 | 1 | 1 |   | 6  | 107099708 |
| rs17724551 |   | 1 |   | 1 |   | 3  | 29495539  |
| rs17735123 | 1 | 1 | 1 | 1 |   | 5  | 73488223  |
| rs17739099 | 1 | 1 | 1 | 1 |   | 2  | 75645775  |
| rs17745881 | 1 | 1 | 1 | 1 |   | 2  | 6586411   |
| rs17747739 | 1 | 1 | 1 | 1 |   | 3  | 9492577   |
| rs17751406 | 1 | 1 | 1 | 1 |   | 14 | 77005693  |
| rs17762729 | 1 | 1 | 1 | 1 |   | 12 | 16044799  |
| rs17780310 | 1 | 1 | 1 | 1 |   | 17 | 68204290  |
| rs17794038 | 1 | 1 | 1 | 1 |   | 14 | 50418171  |
| rs17816047 | 1 | 1 |   |   | 1 | 9  | 116504195 |
| rs17820124 | 1 | 1 | 1 | 1 |   | 4  | 126774227 |
| rs17827858 | 1 | 1 | 1 | 1 |   | 8  | 73580589  |
| rs17832529 | 1 | 1 |   |   | 1 | 3  | 78138810  |
| rs1785835  | 1 | 1 | 1 | 1 |   | 18 | 23938093  |
| rs1786153  | 1 | 1 | 1 | 1 | 1 | 18 | 20752168  |
| rs17863288 |   | 1 |   | 1 |   | 7  | 126807444 |
| rs17866606 | 1 | 1 | 1 | 1 |   | 2  | 234605314 |
| rs1787846  | 1 | 1 | 1 | 1 |   | 18 | 3596272   |
| rs1791468  | 1 | 1 | 1 | 1 |   | 11 | 105913281 |
| rs1791587  | 1 | 1 | 1 | 1 |   | 11 | 106032883 |

|           |   |   |   |   |   |    |           |
|-----------|---|---|---|---|---|----|-----------|
| rs1791648 | 1 | 1 | 1 | 1 |   | 12 | 51033060  |
| rs1792134 | 1 | 1 |   |   | 1 | 11 | 78037817  |
| rs1792747 | 1 | 1 |   |   | 1 | 18 | 51952499  |
| rs1792783 |   | 1 |   | 1 |   | 11 | 109682581 |
| rs1793817 |   | 1 |   | 1 |   | 11 | 130529979 |
| rs179431  |   | 1 |   | 1 |   | 11 | 2508724   |
| rs1795065 | 1 | 1 | 1 | 1 |   | 1  | 212471817 |
| rs1799852 |   | 1 |   | 1 |   | 3  | 134958412 |
| rs1801212 | 1 | 1 | 1 | 1 |   | 4  | 6353420   |
| rs1805124 | 1 | 1 | 1 | 1 |   | 3  | 38620424  |
| rs1805313 | 1 | 1 | 1 | 1 |   | 9  | 115191012 |
| rs1806688 | 1 | 1 | 1 | 1 |   | 2  | 236240055 |
| rs1811257 | 1 | 1 | 1 | 1 |   | 16 | 4957388   |
| rs1812458 | 1 | 1 | 1 | 1 |   | 11 | 61165025  |
| rs181440  | 1 | 1 | 1 | 1 |   | 10 | 119093461 |
| rs1815619 | 1 | 1 | 1 | 1 |   | 14 | 50867994  |
| rs1822917 | 1 | 1 | 1 | 1 |   | 8  | 72430567  |
| rs1828668 |   | 1 |   | 1 |   | 3  | 103229420 |
| rs1830651 | 1 | 1 |   |   | 1 | 6  | 125410408 |
| rs1833208 | 1 | 1 | 1 | 1 |   | 7  | 36752593  |
| rs1833422 | 1 | 1 |   |   | 1 | 18 | 24936257  |
| rs183395  |   | 1 |   | 1 |   | 11 | 114773331 |
| rs183914  |   | 1 |   | 1 |   | 15 | 37983166  |
| rs1841316 | 1 | 1 | 1 | 1 | 1 | 8  | 105911442 |
| rs1857459 | 1 | 1 | 1 | 1 | 1 | 10 | 85674575  |
| rs1859218 | 1 | 1 | 1 | 1 |   | 7  | 11532393  |
| rs1859458 | 1 | 1 | 1 | 1 |   | 12 | 124647333 |
| rs1859569 | 1 | 1 | 1 | 1 |   | 7  | 139195073 |
| rs1860135 |   | 1 |   | 1 |   | 7  | 146964863 |
| rs1860596 |   | 1 |   | 1 |   | 4  | 17269180  |
| rs1860621 | 1 | 1 |   |   | 1 | 4  | 57781793  |
| rs1861532 | 1 | 1 | 1 | 1 |   | 16 | 53235014  |
| rs1862523 |   | 1 |   | 1 |   | 5  | 32706557  |
| rs1863000 | 1 | 1 |   |   | 1 | 7  | 134649270 |
| rs1863063 | 1 | 1 | 1 | 1 |   | 2  | 86371760  |
| rs1863155 |   | 1 |   | 1 |   | 1  | 182443868 |
| rs1863471 | 1 | 1 | 1 | 1 |   | 8  | 53153482  |
| rs1863703 | 1 | 1 |   |   | 1 | 2  | 219252632 |
| rs1866737 | 1 | 1 | 1 | 1 |   | 8  | 73873868  |
| rs1866997 | 1 | 1 | 1 | 1 |   | 3  | 4769099   |
| rs1869092 | 1 | 1 | 1 | 1 |   | 2  | 237276176 |
| rs1869202 | 1 | 1 |   |   | 1 | 9  | 21628592  |
| rs1869990 |   | 1 |   | 1 |   | 2  | 40939001  |
| rs1870566 |   | 1 |   | 1 |   | 12 | 64498284  |
| rs1870580 | 1 | 1 |   |   | 1 | 18 | 48458402  |
| rs187117  | 1 | 1 |   |   | 1 | 9  | 88219523  |
| rs1871944 | 1 | 1 | 1 | 1 |   | 2  | 213533026 |
| rs1872561 |   | 1 |   | 1 |   | 11 | 12037128  |
| rs1872902 | 1 | 1 |   |   | 1 | 11 | 103363331 |
| rs1874494 | 1 | 1 | 1 | 1 |   | 16 | 49479621  |
| rs1874777 | 1 | 1 | 1 | 1 |   | 9  | 128640823 |
| rs1877026 |   | 1 |   | 1 |   | 2  | 62925712  |

|           |   |   |   |   |   |    |           |
|-----------|---|---|---|---|---|----|-----------|
| rs1877378 | 1 | 1 |   |   | 1 | 3  | 123852427 |
| rs1877876 | 1 | 1 | 1 | 1 |   | 9  | 119628375 |
| rs1882094 |   | 1 |   | 1 |   | 7  | 129084568 |
| rs1882396 | 1 | 1 | 1 | 1 |   | 2  | 191424257 |
| rs1884783 | 1 | 1 | 1 | 1 | 1 | 20 | 18673724  |
| rs1886690 | 1 | 1 | 1 | 1 |   | 1  | 39058140  |
| rs1886715 |   | 1 |   | 1 |   | 16 | 19966317  |
| rs1889276 | 1 | 1 |   |   | 1 | 6  | 72386809  |
| rs1891325 | 1 | 1 | 1 | 1 | 1 | 16 | 6372409   |
| rs1891458 |   | 1 |   | 1 |   | 1  | 187413749 |
| rs1891733 | 1 | 1 |   |   | 1 | 1  | 163074454 |
| rs1892064 | 1 | 1 | 1 | 1 |   | 10 | 8401217   |
| rs1893829 |   | 1 |   | 1 |   | 18 | 73083303  |
| rs1894873 | 1 | 1 |   |   | 1 | 7  | 33226669  |
| rs1897191 |   | 1 |   | 1 |   | 10 | 76813473  |
| rs1897280 | 1 | 1 |   |   | 1 | 4  | 141591608 |
| rs1897771 |   | 1 |   | 1 |   | 2  | 80566430  |
| rs1899005 |   | 1 |   | 1 |   | 12 | 72493662  |
| rs1899684 |   | 1 |   | 1 |   | 12 | 72271507  |
| rs1901561 |   | 1 |   | 1 |   | 20 | 12550470  |
| rs1902753 |   | 1 |   | 1 |   | 12 | 95336392  |
| rs1903298 |   | 1 |   | 1 |   | 4  | 60475629  |
| rs1906433 | 1 | 1 | 1 | 1 | 1 | 15 | 51666240  |
| rs1906719 | 1 | 1 |   |   | 1 | 10 | 69584587  |
| rs1908984 | 1 | 1 | 1 | 1 |   | 3  | 21039517  |
| rs1910863 | 1 | 1 | 1 | 1 |   | 2  | 212923321 |
| rs1911252 | 1 | 1 |   |   | 1 | 11 | 132268091 |
| rs1912196 | 1 | 1 | 1 | 1 |   | 2  | 214758765 |
| rs1912214 | 1 | 1 |   |   | 1 | 2  | 214920561 |
| rs1913942 |   | 1 |   | 1 |   | 2  | 161541813 |
| rs1914543 |   | 1 |   | 1 |   | 10 | 125651400 |
| rs1915981 |   | 1 |   | 1 |   | 7  | 3477267   |
| rs1916286 | 1 | 1 |   |   | 1 | 3  | 168062695 |
| rs1916977 | 1 | 1 | 1 | 1 |   | 7  | 113744542 |
| rs1918098 | 1 | 1 | 1 | 1 |   | 2  | 84218157  |
| rs1919555 |   | 1 |   | 1 |   | 3  | 122929590 |
| rs1924485 | 1 | 1 |   |   | 1 | 9  | 13548681  |
| rs1925034 |   | 1 |   | 1 |   | 1  | 156249203 |
| rs1925391 | 1 | 1 | 1 | 1 |   | 13 | 107555920 |
| rs1925611 |   | 1 |   | 1 |   | 10 | 68426924  |
| rs1926150 | 1 | 1 | 1 | 1 |   | 10 | 129441662 |
| rs1927369 |   | 1 |   | 1 |   | 13 | 101933444 |
| rs1927740 |   | 1 |   | 1 |   | 13 | 85209645  |
| rs1928027 | 1 | 1 | 1 | 1 |   | 13 | 110897566 |
| rs1930146 | 1 | 1 | 1 | 1 |   | 10 | 55956562  |
| rs1930903 | 1 | 1 | 1 | 1 | 1 | 1  | 227928109 |
| rs193170  | 1 | 1 | 1 | 1 |   | 11 | 71936788  |
| rs1931902 | 1 | 1 | 1 | 1 |   | 10 | 7695572   |
| rs1933652 | 1 | 1 | 1 | 1 | 1 | 6  | 686043    |
| rs1934285 | 1 | 1 | 1 | 1 |   | 1  | 31764069  |
| rs1937348 | 1 | 1 |   | 1 | 1 | 10 | 17730688  |
| rs1941603 | 1 | 1 | 1 | 1 |   | 11 | 76037370  |

|           |   |   |   |   |   |    |           |
|-----------|---|---|---|---|---|----|-----------|
| rs1942581 |   | 1 |   | 1 |   | 18 | 73322990  |
| rs1942668 | 1 | 1 |   |   | 1 | 11 | 123905821 |
| rs1942849 | 1 | 1 |   |   | 1 | 11 | 128037597 |
| rs1944001 |   | 1 |   | 1 |   | 18 | 74152263  |
| rs1944362 | 1 | 1 | 1 | 1 |   | 18 | 50721343  |
| rs1944720 | 1 | 1 | 1 | 1 |   | 11 | 78988045  |
| rs1946189 | 1 | 1 | 1 | 1 |   | 5  | 164434676 |
| rs1946814 |   | 1 |   | 1 |   | 2  | 178387922 |
| rs1947745 | 1 | 1 | 1 | 1 | 1 | 15 | 25540093  |
| rs1950221 | 1 | 1 | 1 | 1 |   | 14 | 32260976  |
| rs1951797 | 1 | 1 | 1 | 1 |   | 13 | 93854769  |
| rs1952629 |   | 1 |   | 1 |   | 14 | 33805185  |
| rs1955117 | 1 | 1 | 1 | 1 | 1 | 2  | 221779509 |
| rs1955394 | 1 | 1 | 1 | 1 | 1 | 2  | 130339358 |
| rs1958203 |   | 1 |   | 1 |   | 14 | 81363853  |
| rs196048  | 1 | 1 |   |   | 1 | 6  | 22204340  |
| rs1964196 | 1 | 1 | 1 | 1 |   | 9  | 134845241 |
| rs196948  | 1 | 1 | 1 | 1 | 1 | 17 | 59511039  |
| rs1971156 | 1 | 1 |   |   | 1 | 11 | 99263024  |
| rs1975752 | 1 | 1 |   |   | 1 | 15 | 99531932  |
| rs1975944 | 1 | 1 | 1 | 1 |   | 12 | 68094663  |
| rs1978158 | 1 | 1 |   |   | 1 | 7  | 88436606  |
| rs1978368 | 1 | 1 | 1 | 1 |   | 2  | 205209582 |
| rs1978423 | 1 | 1 |   |   | 1 | 19 | 18311713  |
| rs1979558 | 1 | 1 | 1 | 1 | 1 | 13 | 58791375  |
| rs1979689 | 1 | 1 | 1 | 1 |   | 4  | 131326977 |
| rs198132  | 1 | 1 |   |   | 1 | 21 | 23477542  |
| rs1981429 |   | 1 |   | 1 |   | 20 | 43409107  |
| rs1983132 | 1 | 1 |   |   | 1 | 4  | 178456782 |
| rs1983789 | 1 | 1 | 1 | 1 |   | 6  | 163970349 |
| rs1984104 | 1 | 1 | 1 | 1 |   | 10 | 131622978 |
| rs1990623 |   | 1 |   | 1 |   | 16 | 49123471  |
| rs1991767 | 1 | 1 |   |   | 1 | 7  | 46624540  |
| rs1992387 | 1 | 1 | 1 | 1 | 1 | 6  | 13539293  |
| rs1995722 |   | 1 |   | 1 |   | 3  | 20203774  |
| rs1996623 |   | 1 |   | 1 |   | 11 | 20715992  |
| rs1997458 | 1 | 1 | 1 | 1 |   | 2  | 193808515 |
| rs1998323 | 1 | 1 | 1 | 1 |   | 6  | 7491403   |
| rs2000600 | 1 | 1 | 1 | 1 |   | 18 | 932860    |
| rs2001760 | 1 | 1 | 1 | 1 |   | 10 | 70505352  |
| rs2005104 | 1 | 1 | 1 | 1 |   | 4  | 90430802  |
| rs2006933 | 1 | 1 | 1 | 1 |   | 17 | 23625260  |
| rs2006996 | 1 | 1 | 1 | 1 |   | 9  | 116632459 |
| rs2007271 |   | 1 |   | 1 |   | 7  | 24862100  |
| rs201036  | 1 | 1 |   |   | 1 | 6  | 6654117   |
| rs2011604 | 1 | 1 | 1 | 1 |   | 14 | 93975264  |
| rs2013262 | 1 | 1 | 1 | 1 |   | 11 | 12178921  |
| rs201328  | 1 | 1 | 1 | 1 |   | 6  | 21154069  |
| rs2014018 |   | 1 |   | 1 |   | 7  | 96737713  |
| rs201430  | 1 | 1 | 1 | 1 |   | 12 | 97723329  |
| rs2015612 | 1 | 1 | 1 | 1 |   | 18 | 75213904  |
| rs201571  |   | 1 |   | 1 |   | 20 | 21961514  |

|           |   |   |   |   |   |    |           |
|-----------|---|---|---|---|---|----|-----------|
| rs2015747 | 1 | 1 | 1 | 1 | 1 | 11 | 86180785  |
| rs2016012 |   | 1 |   | 1 |   | 18 | 42392478  |
| rs2016465 | 1 | 1 | 1 | 1 |   | 8  | 82067952  |
| rs201739  | 1 | 1 | 1 | 1 |   | 3  | 138991480 |
| rs2018904 | 1 | 1 | 1 | 1 |   | 10 | 27121908  |
| rs201930  | 1 | 1 | 1 | 1 |   | 20 | 17471989  |
| rs2019655 | 1 | 1 |   |   | 1 | 11 | 117205088 |
| rs2022725 | 1 | 1 | 1 | 1 |   | 14 | 36561587  |
| rs2022758 | 1 | 1 | 1 | 1 |   | 14 | 43891878  |
| rs2022841 | 1 | 1 | 1 | 1 |   | 14 | 65424359  |
| rs2023952 | 1 | 1 | 1 | 1 |   | 3  | 50079311  |
| rs2026920 | 1 | 1 |   |   | 1 | 9  | 89859717  |
| rs2029121 | 1 | 1 | 1 | 1 |   | 3  | 8470816   |
| rs2029233 | 1 | 1 |   |   | 1 | 2  | 186639425 |
| rs2030398 | 1 | 1 |   |   | 1 | 3  | 174488667 |
| rs2031581 | 1 | 1 |   |   | 1 | 10 | 4059527   |
| rs2031999 | 1 | 1 | 1 | 1 |   | 9  | 99373980  |
| rs2033884 | 1 | 1 |   |   | 1 | 7  | 21695152  |
| rs2034781 | 1 | 1 | 1 | 1 |   | 6  | 68932219  |
| rs2038281 | 1 | 1 | 1 | 1 | 1 | 14 | 38984948  |
| rs2039490 | 1 | 1 | 1 | 1 |   | 1  | 230817868 |
| rs2040195 |   | 1 |   | 1 |   | 18 | 7387011   |
| rs2041317 | 1 | 1 | 1 | 1 | 1 | 20 | 51797014  |
| rs2041362 | 1 | 1 | 1 | 1 | 1 | 7  | 8011008   |
| rs2045272 | 1 | 1 | 1 | 1 | 1 | 11 | 18234674  |
| rs204538  | 1 | 1 | 1 | 1 |   | 19 | 49647767  |
| rs2047153 | 1 | 1 | 1 | 1 |   | 17 | 59623901  |
| rs2047171 | 1 | 1 | 1 | 1 |   | 12 | 56995916  |
| rs2048161 | 1 | 1 | 1 | 1 |   | 4  | 147072615 |
| rs2048756 |   | 1 |   | 1 |   | 2  | 136872320 |
| rs2048816 | 1 | 1 | 1 | 1 |   | 2  | 228235006 |
| rs2051615 | 1 | 1 |   |   | 1 | 6  | 118574598 |
| rs2054440 | 1 | 1 | 1 | 1 |   | 5  | 150365152 |
| rs2054956 | 1 | 1 | 1 | 1 | 1 | 3  | 67433729  |
| rs2057835 |   | 1 |   | 1 |   | 7  | 122299725 |
| rs2058364 | 1 | 1 | 1 | 1 |   | 17 | 5557413   |
| rs2060530 | 1 | 1 | 1 | 1 |   | 3  | 21492579  |
| rs2061407 | 1 | 1 | 1 | 1 |   | 1  | 96264886  |
| rs2061459 | 1 | 1 |   |   | 1 | 4  | 66751596  |
| rs2062017 | 1 | 1 | 1 | 1 |   | 3  | 139238304 |
| rs2063117 |   | 1 |   | 1 |   | 6  | 54740132  |
| rs2063421 |   | 1 |   | 1 |   | 3  | 192284417 |
| rs2064438 | 1 | 1 |   |   | 1 | 6  | 52491190  |
| rs2064931 | 1 | 1 | 1 | 1 |   | 14 | 93413751  |
| rs2065423 |   | 1 |   | 1 |   | 9  | 12912330  |
| rs2066284 | 1 | 1 | 1 | 1 |   | 1  | 199410397 |
| rs2066843 |   | 1 |   | 1 |   | 16 | 49302700  |
| rs2068278 |   | 1 |   | 1 |   | 3  | 42570405  |
| rs2068888 |   | 1 |   | 1 |   | 10 | 94829632  |
| rs2070713 | 1 | 1 | 1 | 1 |   | 8  | 42164812  |
| rs2071049 | 1 | 1 |   |   | 1 | 21 | 36788350  |
| rs2075375 | 1 | 1 | 1 | 1 | 1 | 2  | 63134194  |

|           |   |   |   |   |   |    |           |
|-----------|---|---|---|---|---|----|-----------|
| rs2075443 | 1 | 1 |   |   | 1 | 17 | 412525    |
| rs2075833 |   | 1 |   | 1 |   | 15 | 87817495  |
| rs2082317 | 1 | 1 |   |   | 1 | 4  | 172061124 |
| rs2082455 | 1 | 1 | 1 | 1 | 1 | 19 | 34699475  |
| rs2088170 | 1 | 1 | 1 | 1 | 1 | 12 | 65068679  |
| rs2101869 | 1 | 1 | 1 | 1 |   | 12 | 115656052 |
| rs2108585 | 1 | 1 | 1 | 1 |   | 22 | 15649076  |
| rs2109302 | 1 | 1 | 1 | 1 |   | 7  | 157208036 |
| rs2110420 | 1 | 1 | 1 | 1 |   | 14 | 77991106  |
| rs2110871 | 1 | 1 |   |   | 1 | 7  | 77918484  |
| rs2113574 | 1 | 1 | 1 | 1 |   | 14 | 78253778  |
| rs2114360 |   | 1 |   | 1 |   | 4  | 139656845 |
| rs2114693 | 1 | 1 | 1 | 1 |   | 4  | 83389196  |
| rs2114802 | 1 | 1 |   |   | 1 | 2  | 16055062  |
| rs2116798 |   | 1 |   | 1 |   | 5  | 166199519 |
| rs2117511 |   | 1 |   | 1 |   | 2  | 136179131 |
| rs2117742 | 1 | 1 | 1 | 1 | 1 | 2  | 137765283 |
| rs2118836 | 1 | 1 | 1 | 1 |   | 2  | 96526699  |
| rs2120991 | 1 | 1 | 1 | 1 |   | 12 | 52556495  |
| rs2122211 | 1 | 1 | 1 | 1 |   | 13 | 38166845  |
| rs2122488 | 1 | 1 | 1 | 1 |   | 16 | 52916974  |
| rs2124048 | 1 | 1 | 1 | 1 |   | 12 | 53445641  |
| rs212434  | 1 | 1 | 1 | 1 |   | 7  | 105308445 |
| rs2126650 | 1 | 1 |   |   | 1 | 4  | 88929611  |
| rs2127247 | 1 | 1 | 1 | 1 |   | 15 | 93056906  |
| rs2127958 | 1 | 1 |   |   | 1 | 18 | 16907608  |
| rs2128162 | 1 | 1 | 1 | 1 | 1 | 3  | 14273268  |
| rs2130118 | 1 | 1 | 1 | 1 | 1 | 9  | 75533109  |
| rs2132074 |   | 1 |   | 1 |   | 4  | 62099094  |
| rs2134733 |   | 1 |   | 1 |   | 11 | 11115881  |
| rs213496  | 1 | 1 | 1 | 1 | 1 | 1  | 54642404  |
| rs2135053 | 1 | 1 | 1 | 1 | 1 | 5  | 174398116 |
| rs2135091 | 1 | 1 | 1 | 1 |   | 18 | 74022466  |
| rs213558  |   | 1 |   | 1 |   | 14 | 77703927  |
| rs2136886 | 1 | 1 | 1 | 1 |   | 19 | 21847999  |
| rs213759  | 1 | 1 | 1 | 1 |   | 1  | 41365585  |
| rs2139747 | 1 | 1 | 1 | 1 |   | 3  | 127870565 |
| rs2141188 | 1 | 1 | 1 | 1 |   | 12 | 130029977 |
| rs2143491 |   | 1 |   | 1 |   | 20 | 45662074  |
| rs2145449 | 1 | 1 | 1 | 1 |   | 14 | 51154060  |
| rs2148379 | 1 | 1 | 1 | 1 |   | 10 | 129076914 |
| rs2149474 | 1 | 1 |   |   | 1 | 20 | 17969425  |
| rs2149973 | 1 | 1 | 1 | 1 |   | 13 | 29670079  |
| rs2150541 | 1 | 1 | 1 | 1 |   | 14 | 52575641  |
| rs2151842 | 1 | 1 | 1 | 1 |   | 1  | 88200787  |
| rs2153904 | 1 | 1 | 1 | 1 |   | 1  | 203909413 |
| rs2154254 | 1 | 1 | 1 | 1 |   | 10 | 90832411  |
| rs2154723 | 1 | 1 |   |   | 1 | 21 | 22258522  |
| rs2155304 |   | 1 |   | 1 |   | 11 | 134211153 |
| rs2155854 | 1 | 1 | 1 | 1 |   | 11 | 117531885 |
| rs2159906 | 1 | 1 | 1 | 1 |   | 14 | 74460665  |
| rs2166441 | 1 | 1 | 1 | 1 |   | 2  | 233465687 |

|           |   |   |   |   |   |    |           |
|-----------|---|---|---|---|---|----|-----------|
| rs2166480 |   | 1 |   | 1 |   | 2  | 135353808 |
| rs2166488 | 1 | 1 | 1 | 1 |   | 2  | 157868082 |
| rs2167500 |   | 1 |   | 1 |   | 2  | 121087061 |
| rs2174147 |   | 1 |   | 1 |   | 5  | 8049261   |
| rs2174896 |   | 1 |   | 1 |   | 18 | 72370842  |
| rs2175075 | 1 | 1 | 1 | 1 | 1 | 13 | 75656049  |
| rs217520  |   | 1 |   | 1 |   | 6  | 108600042 |
| rs2180046 | 1 | 1 | 1 | 1 |   | 6  | 99556802  |
| rs2180611 | 1 | 1 | 1 | 1 | 1 | 14 | 68190238  |
| rs2183090 | 1 | 1 |   |   | 1 | 14 | 47451303  |
| rs2183589 | 1 | 1 |   |   | 1 | 21 | 45645919  |
| rs2184221 | 1 | 1 | 1 | 1 |   | 9  | 121606307 |
| rs2184925 | 1 | 1 | 1 | 1 |   | 6  | 75695019  |
| rs2185870 |   | 1 |   | 1 |   | 20 | 23202835  |
| rs2186078 | 1 | 1 |   |   | 1 | 14 | 61931611  |
| rs2188172 |   | 1 |   | 1 |   | 7  | 103916122 |
| rs2189864 | 1 | 1 | 1 | 1 |   | 7  | 9069245   |
| rs2192562 | 1 | 1 |   |   | 1 | 2  | 59331796  |
| rs2192754 | 1 | 1 | 1 | 1 |   | 2  | 171127153 |
| rs2192883 | 1 | 1 | 1 | 1 |   | 7  | 77934592  |
| rs2194549 | 1 | 1 | 1 | 1 |   | 2  | 229005209 |
| rs2194656 | 1 | 1 | 1 | 1 |   | 7  | 7825727   |
| rs2194860 | 1 | 1 | 1 | 1 | 1 | 4  | 110167960 |
| rs220281  | 1 | 1 |   |   | 1 | 21 | 42366655  |
| rs2203615 | 1 | 1 |   |   | 1 | 10 | 113283739 |
| rs2204584 | 1 | 1 |   |   | 1 | 2  | 156627584 |
| rs2205453 |   | 1 |   | 1 |   | 21 | 16285114  |
| rs2209287 |   | 1 |   | 1 |   | 10 | 9394282   |
| rs2211312 | 1 | 1 | 1 | 1 |   | 13 | 107203928 |
| rs2211689 | 1 | 1 | 1 | 1 |   | 21 | 33971944  |
| rs2214020 | 1 | 1 | 1 | 1 |   | 5  | 9905860   |
| rs2214640 | 1 | 1 |   |   | 1 | 5  | 129651537 |
| rs2215124 | 1 | 1 | 1 | 1 |   | 19 | 48499480  |
| rs2217375 | 1 | 1 | 1 | 1 |   | 8  | 112625863 |
| rs2218868 | 1 | 1 | 1 | 1 | 1 | 11 | 57682553  |
| rs2218935 | 1 | 1 | 1 | 1 |   | 3  | 165368167 |
| rs2223246 | 1 | 1 | 1 | 1 |   | 20 | 41378557  |
| rs2231895 | 1 | 1 | 1 | 1 |   | 2  | 164177073 |
| rs2235338 | 1 | 1 | 1 | 1 | 1 | 22 | 36295826  |
| rs2237148 | 1 | 1 | 1 | 1 | 1 | 6  | 15520143  |
| rs2237997 | 1 | 1 | 1 | 1 | 1 | 11 | 60528666  |
| rs2238508 | 1 | 1 | 1 | 1 |   | 16 | 24213671  |
| rs2239633 | 1 | 1 | 1 | 1 |   | 14 | 22658897  |
| rs2240226 | 1 | 1 |   |   | 1 | 17 | 39621744  |
| rs2241466 | 1 | 1 | 1 | 1 |   | 4  | 9768201   |
| rs2244500 | 1 | 1 |   |   | 1 | 18 | 651005    |
| rs2246901 | 1 | 1 |   |   | 1 | 3  | 196974680 |
| rs2251530 | 1 | 1 | 1 | 1 |   | 9  | 86002760  |
| rs2252229 | 1 | 1 | 1 | 1 |   | 3  | 102114269 |
| rs2252355 | 1 | 1 |   |   | 1 | 21 | 38362812  |
| rs225263  |   | 1 |   | 1 |   | 17 | 30983950  |
| rs2252653 | 1 | 1 |   |   | 1 | 21 | 24070703  |

|           |   |   |   |   |   |    |           |
|-----------|---|---|---|---|---|----|-----------|
| rs2253820 | 1 | 1 | 1 | 1 | 1 | 17 | 7988894   |
| rs2255831 | 1 | 1 | 1 | 1 |   | 4  | 146476158 |
| rs226191  | 1 | 1 |   |   | 1 | 20 | 8903810   |
| rs2267025 | 1 | 1 | 1 | 1 |   | 22 | 21966541  |
| rs2268933 | 1 | 1 | 1 | 1 |   | 3  | 180938305 |
| rs2270180 |   | 1 |   | 1 |   | 17 | 17125827  |
| rs2270409 | 1 | 1 | 1 | 1 |   | 8  | 141174956 |
| rs2270834 | 1 | 1 | 1 | 1 |   | 16 | 5050272   |
| rs227163  | 1 | 1 |   |   | 1 | 1  | 7883793   |
| rs2274058 | 1 | 1 |   |   | 1 | 13 | 97867381  |
| rs2274323 | 1 | 1 |   |   | 1 | 9  | 37721177  |
| rs2274531 | 1 | 1 |   |   | 1 | 1  | 165309386 |
| rs2274558 |   | 1 |   | 1 |   | 9  | 88561563  |
| rs2275302 | 1 | 1 | 1 | 1 | 1 | 1  | 230657489 |
| rs2277080 | 1 | 1 |   |   | 1 | 6  | 17939398  |
| rs227906  | 1 | 1 | 1 | 1 |   | 4  | 113049611 |
| rs2279095 | 1 | 1 | 1 | 1 | 1 | 5  | 76745182  |
| rs2279578 | 1 | 1 | 1 | 1 |   | 15 | 38951636  |
| rs2279772 |   | 1 |   | 1 |   | 5  | 79571190  |
| rs2280699 | 1 | 1 | 1 | 1 |   | 12 | 51783965  |
| rs2281991 | 1 | 1 | 1 | 1 |   | 13 | 101164826 |
| rs2282765 |   | 1 |   | 1 |   | 4  | 2481852   |
| rs2284759 | 1 | 1 | 1 | 1 |   | 1  | 166607891 |
| rs2284872 | 1 | 1 | 1 | 1 |   | 2  | 162596215 |
| rs2284944 | 1 | 1 | 1 | 1 |   | 10 | 33530847  |
| rs2286223 |   | 1 |   | 1 |   | 7  | 16629971  |
| rs2287537 | 1 | 1 | 1 | 1 |   | 1  | 195748888 |
| rs2288242 | 1 | 1 | 1 | 1 |   | 15 | 29117572  |
| rs2289332 |   | 1 |   | 1 |   | 15 | 38471072  |
| rs2290518 |   | 1 |   | 1 |   | 2  | 135595284 |
| rs2291959 | 1 | 1 | 1 | 1 |   | 16 | 68431493  |
| rs2292462 | 1 | 1 |   |   | 1 | 15 | 83001758  |
| rs2292702 | 1 | 1 | 1 | 1 |   | 12 | 122696081 |
| rs2292719 | 1 | 1 | 1 | 1 |   | 3  | 121980525 |
| rs2292745 | 1 | 1 | 1 | 1 | 1 | 15 | 66411344  |
| rs2293286 | 1 | 1 |   |   | 1 | 6  | 161470989 |
| rs2293452 | 1 | 1 |   |   | 1 | 7  | 76794575  |
| rs2295682 | 1 | 1 | 1 | 1 |   | 14 | 22444702  |
| rs2297216 | 1 | 1 | 1 | 1 |   | 9  | 33015503  |
| rs2298608 | 1 | 1 | 1 | 1 |   | 11 | 58161043  |
| rs2298830 |   | 1 |   | 1 |   | 11 | 83495008  |
| rs2299945 |   | 1 |   | 1 |   | 7  | 38408168  |
| rs2301570 | 1 | 1 | 1 | 1 |   | 3  | 130678353 |
| rs2303802 | 1 | 1 | 1 | 1 |   | 5  | 65494453  |
| rs2303818 |   | 1 |   | 1 |   | 19 | 17216549  |
| rs2304066 |   | 1 |   | 1 |   | 5  | 145760885 |
| rs2304128 | 1 | 1 | 1 | 1 |   | 19 | 19607151  |
| rs2304130 |   | 1 |   | 1 |   | 19 | 19650528  |
| rs2304572 | 1 | 1 | 1 | 1 |   | 2  | 25206783  |
| rs2306124 |   | 1 |   | 1 |   | 1  | 153326475 |
| rs2306967 | 1 | 1 | 1 | 1 |   | 16 | 85082979  |
| rs2318035 | 1 | 1 |   |   | 1 | 17 | 3309819   |

|           |   |   |   |   |   |    |           |
|-----------|---|---|---|---|---|----|-----------|
| rs2323154 | 1 | 1 | 1 | 1 |   | 6  | 82003585  |
| rs2326106 | 1 | 1 | 1 | 1 | 1 | 6  | 2934581   |
| rs2327506 | 1 | 1 | 1 | 1 |   | 6  | 12137410  |
| rs2328492 | 1 | 1 | 1 | 1 |   | 20 | 20040843  |
| rs2329151 | 1 | 1 | 1 | 1 |   | 13 | 79498340  |
| rs2330951 |   | 1 |   | 1 |   | 7  | 55141836  |
| rs2331175 | 1 | 1 | 1 | 1 |   | 7  | 44926448  |
| rs2331295 | 1 | 1 | 1 | 1 |   | 22 | 25425712  |
| rs233494  | 1 | 1 |   |   | 1 | 6  | 14913493  |
| rs2337024 | 1 | 1 |   |   | 1 | 18 | 19129791  |
| rs2339299 | 1 | 1 | 1 | 1 |   | 15 | 31776396  |
| rs234062  |   | 1 |   | 1 |   | 3  | 173777034 |
| rs2344369 | 1 | 1 |   |   | 1 | 2  | 233198695 |
| rs234481  | 1 | 1 | 1 | 1 |   | 6  | 124396905 |
| rs2350477 | 1 | 1 | 1 | 1 |   | 4  | 161840389 |
| rs2352734 | 1 | 1 |   |   | 1 | 3  | 144354797 |
| rs2359453 | 1 | 1 |   |   | 1 | 3  | 53567904  |
| rs2360969 | 1 | 1 | 1 | 1 |   | 2  | 208081241 |
| rs2362255 |   | 1 |   | 1 |   | 1  | 244130482 |
| rs236258  | 1 | 1 |   |   | 1 | 6  | 79159396  |
| rs236301  | 1 | 1 | 1 | 1 |   | 1  | 93886569  |
| rs2366812 | 1 | 1 |   |   | 1 | 2  | 85808055  |
| rs2367090 |   | 1 |   | 1 |   | 7  | 80447883  |
| rs2369465 |   | 1 |   | 1 |   | 12 | 75979658  |
| rs2373146 | 1 | 1 |   |   | 1 | 2  | 218346421 |
| rs2378357 | 1 | 1 | 1 | 1 |   | 3  | 189226355 |
| rs2380646 | 1 | 1 | 1 | 1 | 1 | 8  | 71521018  |
| rs2383542 |   | 1 |   | 1 |   | 9  | 25504397  |
| rs2384992 | 1 | 1 | 1 | 1 |   | 19 | 18247798  |
| rs2385537 | 1 | 1 |   |   | 1 | 7  | 104542750 |
| rs2387673 | 1 | 1 | 1 | 1 |   | 10 | 1449379   |
| rs2387698 | 1 | 1 | 1 | 1 |   | 1  | 10914691  |
| rs2388121 | 1 | 1 |   |   | 1 | 10 | 2094415   |
| rs2390288 |   | 1 |   | 1 |   | 7  | 20281739  |
| rs2393904 | 1 | 1 |   |   | 1 | 10 | 64049332  |
| rs2396081 | 1 | 1 | 1 | 1 |   | 6  | 43878490  |
| rs2398513 | 1 | 1 | 1 | 1 | 1 | 12 | 129542529 |
| rs2402800 | 1 | 1 | 1 | 1 |   | 7  | 125268655 |
| rs2403151 |   | 1 |   | 1 |   | 12 | 82734365  |
| rs2405265 | 1 | 1 | 1 | 1 |   | 12 | 84647202  |
| rs2405563 | 1 | 1 |   |   | 1 | 3  | 163485828 |
| rs2409416 | 1 | 1 | 1 | 1 |   | 21 | 31897192  |
| rs2409948 | 1 | 1 | 1 | 1 |   | 21 | 38315359  |
| rs241337  |   | 1 |   | 1 |   | 1  | 227016231 |
| rs241529  | 1 | 1 | 1 | 1 |   | 14 | 55581216  |
| rs2417550 |   | 1 |   | 1 |   | 12 | 16299489  |
| rs2417733 | 1 | 1 | 1 | 1 |   | 9  | 99968803  |
| rs2418103 | 1 | 1 | 1 | 1 |   | 12 | 10747522  |
| rs2426370 | 1 | 1 | 1 | 1 |   | 20 | 49716977  |
| rs243099  | 1 | 1 | 1 | 1 |   | 6  | 48762363  |
| rs243842  | 1 | 1 |   |   | 1 | 16 | 54084923  |
| rs244050  | 1 | 1 | 1 | 1 |   | 4  | 111440341 |

|           |   |   |   |   |   |    |           |
|-----------|---|---|---|---|---|----|-----------|
| rs2441859 | 1 | 1 | 1 | 1 |   | 8  | 105385910 |
| rs244755  | 1 | 1 |   |   | 1 | 5  | 88131541  |
| rs2449223 | 1 | 1 | 1 | 1 |   | 8  | 3470227   |
| rs2451688 | 1 | 1 | 1 | 1 | 1 | 6  | 129688258 |
| rs2454797 | 1 | 1 |   |   | 1 | 10 | 11471699  |
| rs2456220 | 1 | 1 | 1 | 1 |   | 5  | 52202489  |
| rs2468366 |   | 1 |   | 1 |   | 12 | 94612000  |
| rs2468638 | 1 | 1 | 1 | 1 |   | 11 | 23041477  |
| rs2468782 | 1 | 1 |   |   | 1 | 11 | 18092218  |
| rs2474619 | 1 | 1 | 1 | 1 |   | 6  | 90936756  |
| rs2475229 | 1 | 1 | 1 | 1 |   | 10 | 116248374 |
| rs2475357 | 1 | 1 | 1 | 1 |   | 9  | 10260339  |
| rs247968  |   | 1 |   | 1 |   | 3  | 174659070 |
| rs248327  | 1 | 1 | 1 | 1 | 1 | 5  | 179310256 |
| rs2484714 | 1 | 1 | 1 | 1 |   | 1  | 43472557  |
| rs2489772 | 1 | 1 | 1 | 1 |   | 1  | 15117348  |
| rs2490373 | 1 | 1 | 1 | 1 |   | 1  | 235366331 |
| rs2492501 | 1 | 1 | 1 | 1 |   | 1  | 112732779 |
| rs2495718 | 1 | 1 | 1 | 1 |   | 10 | 102369287 |
| rs2498655 |   | 1 |   | 1 |   | 6  | 139462688 |
| rs2499081 | 1 | 1 | 1 | 1 |   | 10 | 19632472  |
| rs2501685 | 1 | 1 |   |   | 1 | 10 | 6853222   |
| rs250316  |   | 1 |   | 1 |   | 19 | 8782033   |
| rs2503848 | 1 | 1 | 1 | 1 |   | 10 | 42992791  |
| rs250413  | 1 | 1 | 1 | 1 |   | 5  | 34018325  |
| rs2506145 | 1 | 1 |   |   | 1 | 10 | 33511136  |
| rs2510580 | 1 | 1 |   |   | 1 | 11 | 94807509  |
| rs251083  | 1 | 1 |   |   | 1 | 5  | 94549621  |
| rs2521208 | 1 | 1 | 1 | 1 |   | 7  | 93918435  |
| rs2522824 | 1 | 1 |   |   | 1 | 7  | 27028318  |
| rs2523177 | 1 | 1 | 1 | 1 |   | 19 | 2225578   |
| rs2526058 |   | 1 |   | 1 |   | 16 | 72612170  |
| rs2538492 |   | 1 |   | 1 |   | 7  | 120492482 |
| rs2541892 | 1 | 1 |   |   | 1 | 12 | 106167806 |
| rs2542391 | 1 | 1 |   |   | 1 | 3  | 9627168   |
| rs2544663 | 1 | 1 |   |   | 1 | 5  | 86457227  |
| rs2545450 |   | 1 |   | 1 |   | 8  | 140638295 |
| rs2552353 | 1 | 1 | 1 | 1 |   | 2  | 52463211  |
| rs2556097 | 1 | 1 | 1 | 1 |   | 2  | 160395307 |
| rs2560301 | 1 | 1 | 1 | 1 |   | 5  | 121457707 |
| rs2561144 |   | 1 |   | 1 |   | 5  | 38307093  |
| rs256178  |   | 1 |   | 1 |   | 12 | 95068600  |
| rs2569804 |   | 1 |   | 1 |   | 12 | 126195417 |
| rs2574824 | 1 | 1 | 1 | 1 |   | 11 | 112573849 |
| rs258160  |   | 1 |   | 1 |   | 16 | 62372315  |
| rs2582038 |   | 1 |   | 1 |   | 4  | 89525529  |
| rs259312  | 1 | 1 |   |   | 1 | 7  | 111529106 |
| rs2594036 |   | 1 |   | 1 |   | 12 | 32044928  |
| rs259588  |   | 1 |   | 1 |   | 1  | 236537568 |
| rs260445  | 1 | 1 | 1 | 1 |   | 19 | 63437743  |
| rs2611279 |   | 1 |   | 1 |   | 12 | 83455528  |
| rs2611605 | 1 | 1 | 1 | 1 | 1 | 15 | 30228925  |

|           |   |   |   |   |   |    |           |
|-----------|---|---|---|---|---|----|-----------|
| rs261234  | 1 | 1 |   |   | 1 | 5  | 95988209  |
| rs26135   |   | 1 |   | 1 |   | 5  | 14238484  |
| rs2614967 |   | 1 |   | 1 |   | 7  | 3594325   |
| rs261558  |   | 1 |   | 1 |   | 8  | 97112645  |
| rs2616612 | 1 | 1 | 1 | 1 |   | 10 | 78657189  |
| rs2616982 | 1 | 1 | 1 | 1 |   | 8  | 4468097   |
| rs2622892 | 1 | 1 | 1 | 1 |   | 6  | 37362968  |
| rs2625289 | 1 | 1 |   |   | 1 | 3  | 102987314 |
| rs2629877 |   | 1 |   | 1 |   | 3  | 59768102  |
| rs2630516 | 1 | 1 |   |   | 1 | 8  | 130480628 |
| rs2630615 | 1 | 1 |   |   | 1 | 3  | 73226780  |
| rs263315  |   | 1 |   | 1 |   | 2  | 157747471 |
| rs2638551 | 1 | 1 | 1 | 1 |   | 6  | 119105449 |
| rs2642170 | 1 | 1 |   |   | 1 | 4  | 59203383  |
| rs26438   | 1 | 1 | 1 | 1 |   | 5  | 165221499 |
| rs2644640 | 1 | 1 | 1 | 1 |   | 5  | 174788017 |
| rs2649130 |   | 1 |   | 1 |   | 8  | 137883767 |
| rs2650170 | 1 | 1 | 1 | 1 | 1 | 12 | 116506138 |
| rs2650492 | 1 | 1 |   |   | 1 | 16 | 28240912  |
| rs2651458 | 1 | 1 | 1 | 1 |   | 8  | 97694626  |
| rs2655118 | 1 | 1 | 1 | 1 |   | 16 | 22848668  |
| rs2656953 | 1 | 1 | 1 | 1 |   | 5  | 89822522  |
| rs2657197 | 1 | 1 |   |   | 1 | 8  | 92600296  |
| rs2657340 | 1 | 1 |   |   | 1 | 7  | 158489729 |
| rs2660214 | 1 | 1 |   |   | 1 | 10 | 52402458  |
| rs2662824 | 1 | 1 | 1 | 1 |   | 12 | 126218723 |
| rs2664283 |   | 1 |   | 1 |   | 10 | 75296379  |
| rs2667014 | 1 | 1 |   |   | 1 | 2  | 160576628 |
| rs2669331 | 1 | 1 | 1 | 1 |   | 13 | 62497279  |
| rs2672734 | 1 | 1 | 1 | 1 |   | 5  | 508696    |
| rs2673562 | 1 | 1 | 1 | 1 |   | 8  | 133485738 |
| rs267660  |   | 1 |   | 1 |   | 1  | 30313297  |
| rs2684257 |   | 1 |   | 1 |   | 6  | 122416168 |
| rs2684796 | 1 | 1 | 1 | 1 |   | 15 | 97300915  |
| rs2686534 | 1 | 1 |   |   | 1 | 3  | 5500968   |
| rs2687134 | 1 | 1 |   |   | 1 | 7  | 99168978  |
| rs2691244 | 1 | 1 | 1 | 1 |   | 19 | 56277071  |
| rs2692699 | 1 | 1 | 1 | 1 |   | 3  | 193612689 |
| rs2694992 | 1 | 1 |   |   | 1 | 12 | 19968402  |
| rs2695109 |   | 1 |   | 1 |   | 2  | 178509996 |
| rs2697672 | 1 | 1 | 1 | 1 |   | 8  | 90990807  |
| rs269850  | 1 | 1 | 1 | 1 |   | 5  | 95846052  |
| rs2700230 | 1 | 1 | 1 | 1 |   | 3  | 114337029 |
| rs270274  | 1 | 1 | 1 | 1 |   | 6  | 153872229 |
| rs2702842 | 1 | 1 | 1 | 1 |   | 8  | 6708812   |
| rs270524  |   | 1 |   | 1 |   | 1  | 232651626 |
| rs2711702 | 1 | 1 | 1 | 1 |   | 12 | 45704239  |
| rs2716644 | 1 | 1 | 1 | 1 |   | 2  | 12035905  |
| rs2717274 |   | 1 |   | 1 |   | 3  | 183953780 |
| rs2717418 | 1 | 1 | 1 | 1 |   | 12 | 69259863  |
| rs2718324 | 1 | 1 | 1 | 1 |   | 7  | 88044436  |
| rs2719630 | 1 | 1 |   |   | 1 | 16 | 10644849  |

|           |   |   |   |   |   |    |           |
|-----------|---|---|---|---|---|----|-----------|
| rs2719774 | 1 | 1 |   |   | 1 | 20 | 8265018   |
| rs2721133 | 1 | 1 |   |   | 1 | 8  | 128997800 |
| rs272118  | 1 | 1 | 1 | 1 |   | 2  | 131258321 |
| rs2723891 | 1 | 1 | 1 | 1 | 1 | 12 | 89482389  |
| rs2724031 | 1 | 1 | 1 | 1 |   | 7  | 95872204  |
| rs2726675 | 1 | 1 | 1 | 1 |   | 4  | 108764392 |
| rs2726835 |   | 1 |   | 1 |   | 11 | 27871761  |
| rs2727269 |   | 1 |   | 1 |   | 11 | 61467398  |
| rs2729910 | 1 | 1 | 1 | 1 |   | 11 | 19379693  |
| rs2730446 |   | 1 |   | 1 |   | 12 | 117785571 |
| rs2733332 | 1 | 1 | 1 | 1 |   | 15 | 55175641  |
| rs273438  | 1 | 1 |   |   | 1 | 9  | 81108189  |
| rs2734605 | 1 | 1 |   |   | 1 | 7  | 101682584 |
| rs2735202 | 1 | 1 | 1 | 1 |   | 11 | 113458316 |
| rs2741390 | 1 | 1 |   |   | 1 | 20 | 51584592  |
| rs2749817 |   | 1 |   | 1 |   | 20 | 23007255  |
| rs2761291 | 1 | 1 | 1 | 1 |   | 10 | 95078170  |
| rs2765584 | 1 | 1 | 1 | 1 |   | 13 | 102625828 |
| rs2769594 | 1 | 1 |   |   | 1 | 9  | 87108348  |
| rs2772181 | 1 | 1 | 1 | 1 |   | 13 | 40530244  |
| rs2773207 | 1 | 1 | 1 | 1 |   | 10 | 109591882 |
| rs2777321 | 1 | 1 | 1 | 1 |   | 9  | 123396697 |
| rs2779154 | 1 | 1 | 1 | 1 |   | 11 | 29405675  |
| rs2784101 | 1 | 1 | 1 | 1 | 1 | 1  | 197023984 |
| rs278729  | 1 | 1 | 1 | 1 |   | 9  | 75351787  |
| rs278891  |   | 1 |   | 1 |   | 8  | 89058432  |
| rs2789514 | 1 | 1 | 1 | 1 |   | 9  | 128872850 |
| rs279205  | 1 | 1 |   |   | 1 | 19 | 11875274  |
| rs2792248 | 1 | 1 | 1 | 1 |   | 1  | 162891886 |
| rs2793471 | 1 | 1 | 1 | 1 |   | 11 | 29344374  |
| rs2796431 | 1 | 1 | 1 | 1 |   | 1  | 202247602 |
| rs2798950 | 1 | 1 | 1 | 1 |   | 6  | 78255240  |
| rs2800257 | 1 | 1 | 1 | 1 |   | 9  | 36795874  |
| rs2802028 | 1 | 1 |   |   | 1 | 1  | 90135202  |
| rs2803183 | 1 | 1 | 1 | 1 |   | 6  | 80235582  |
| rs2803353 | 1 | 1 | 1 | 1 |   | 6  | 158194386 |
| rs2808219 | 1 | 1 |   |   | 1 | 1  | 219224523 |
| rs2809823 | 1 | 1 | 1 | 1 |   | 1  | 100776350 |
| rs2812489 | 1 | 1 |   |   | 1 | 6  | 129899810 |
| rs2820549 | 1 | 1 | 1 | 1 |   | 1  | 70933429  |
| rs282152  | 1 | 1 | 1 | 1 |   | 20 | 527657    |
| rs2822548 | 1 | 1 | 1 | 1 |   | 21 | 14577923  |
| rs2824153 | 1 | 1 |   |   | 1 | 21 | 17252527  |
| rs2824976 | 1 | 1 | 1 | 1 |   | 21 | 18948707  |
| rs2826056 | 1 | 1 |   |   | 1 | 21 | 20459129  |
| rs2829259 |   | 1 |   | 1 |   | 21 | 24981923  |
| rs2830720 | 1 | 1 |   |   | 1 | 21 | 27431448  |
| rs2831507 | 1 | 1 | 1 | 1 |   | 21 | 28406326  |
| rs2832077 | 1 | 1 | 1 | 1 |   | 21 | 29062892  |
| rs2832146 | 1 | 1 | 1 | 1 |   | 21 | 29246626  |
| rs2832556 | 1 | 1 | 1 | 1 |   | 21 | 30338331  |
| rs2832643 | 1 | 1 | 1 | 1 | 1 | 21 | 30450088  |

|           |   |   |   |   |   |    |           |
|-----------|---|---|---|---|---|----|-----------|
| rs2833370 | 1 | 1 |   |   | 1 | 21 | 31604744  |
| rs2833800 | 1 | 1 | 1 | 1 |   | 21 | 32704523  |
| rs2834328 | 1 | 1 |   |   | 1 | 21 | 34285545  |
| rs2836604 | 1 | 1 | 1 | 1 |   | 21 | 38963165  |
| rs2836824 | 1 | 1 | 1 | 1 | 1 | 21 | 39302693  |
| rs2838857 | 1 | 1 | 1 | 1 |   | 21 | 45505428  |
| rs2839349 | 1 | 1 | 1 | 1 |   | 21 | 46841625  |
| rs2839475 | 1 | 1 | 1 | 1 |   | 21 | 42481242  |
| rs2839589 | 1 | 1 | 1 | 1 |   | 21 | 43147296  |
| rs2840131 | 1 | 1 | 1 | 1 |   | 4  | 133131132 |
| rs2840790 | 1 | 1 | 1 | 1 | 1 | 9  | 17959519  |
| rs2841455 | 1 | 1 | 1 | 1 |   | 9  | 87208676  |
| rs2844353 | 1 | 1 | 1 | 1 |   | 3  | 37736237  |
| rs2846712 | 1 | 1 |   |   | 1 | 11 | 102023197 |
| rs2850971 | 1 | 1 | 1 | 1 | 1 | 4  | 102403649 |
| rs285327  | 1 | 1 | 1 | 1 | 1 | 3  | 36289024  |
| rs2855711 | 1 | 1 |   |   | 1 | 12 | 11921573  |
| rs2860493 | 1 | 1 | 1 | 1 | 1 | 12 | 67209117  |
| rs2865170 |   | 1 |   | 1 |   | 7  | 68601365  |
| rs2866904 | 1 | 1 | 1 | 1 |   | 4  | 107563647 |
| rs2867840 | 1 | 1 |   |   | 1 | 3  | 151353849 |
| rs2871647 | 1 | 1 | 1 | 1 |   | 17 | 73649072  |
| rs2873949 |   | 1 |   | 1 |   | 3  | 148846956 |
| rs2876167 | 1 | 1 | 1 | 1 | 1 | 6  | 9589358   |
| rs2876507 | 1 | 1 | 1 | 1 |   | 20 | 18941114  |
| rs2877251 | 1 | 1 | 1 | 1 |   | 22 | 23564481  |
| rs288057  | 1 | 1 | 1 | 1 |   | 2  | 210100956 |
| rs2882314 |   | 1 |   | 1 |   | 4  | 66371020  |
| rs2882836 | 1 | 1 |   |   | 1 | 7  | 10434228  |
| rs2887510 | 1 | 1 | 1 | 1 |   | 10 | 30448820  |
| rs2887631 | 1 | 1 | 1 | 1 |   | 12 | 1804842   |
| rs2891409 | 1 | 1 | 1 | 1 |   | 2  | 24870861  |
| rs2892805 | 1 | 1 |   |   | 1 | 2  | 169641221 |
| rs2893506 | 1 | 1 | 1 | 1 |   | 7  | 35408196  |
| rs2893976 | 1 | 1 |   |   | 1 | 10 | 67428926  |
| rs2895117 | 1 | 1 | 1 | 1 |   | 12 | 127814267 |
| rs2895892 | 1 | 1 |   |   | 1 | 12 | 80693267  |
| rs28964   | 1 | 1 | 1 | 1 |   | 17 | 28346367  |
| rs2897737 |   | 1 |   | 1 |   | 5  | 122660322 |
| rs2901100 | 1 | 1 | 1 | 1 |   | 10 | 117999796 |
| rs2902663 |   | 1 |   | 1 |   | 1  | 23866788  |
| rs2904979 | 1 | 1 |   |   | 1 | 11 | 64757295  |
| rs2908201 | 1 | 1 | 1 | 1 |   | 7  | 75765061  |
| rs2912023 | 1 | 1 |   |   | 1 | 8  | 6627619   |
| rs2914383 |   | 1 |   | 1 |   | 19 | 58437969  |
| rs291593  |   | 1 |   | 1 |   | 1  | 97316340  |
| rs2927612 | 1 | 1 | 1 | 1 |   | 5  | 96225249  |
| rs2930059 | 1 | 1 |   |   | 1 | 5  | 10806399  |
| rs2934550 | 1 | 1 | 1 | 1 |   | 5  | 2931637   |
| rs2936561 |   | 1 |   | 1 |   | 10 | 107248937 |
| rs2937785 | 1 | 1 | 1 | 1 |   | 5  | 6250044   |
| rs2944822 |   | 1 |   | 1 |   | 7  | 71433528  |

|           |   |   |   |   |   |    |           |
|-----------|---|---|---|---|---|----|-----------|
| rs29460   | 1 | 1 | 1 | 1 | 1 | 5  | 65570159  |
| rs2957060 | 1 | 1 | 1 | 1 |   | 8  | 1664196   |
| rs2959494 |   | 1 |   | 1 |   | 18 | 60263771  |
| rs2960110 | 1 | 1 | 1 | 1 |   | 8  | 138523838 |
| rs2961110 | 1 | 1 | 1 | 1 |   | 8  | 103577251 |
| rs2968485 | 1 | 1 | 1 | 1 | 1 | 1  | 96642521  |
| rs2968671 |   | 1 |   | 1 |   | 4  | 5025571   |
| rs2976456 |   | 1 |   | 1 |   | 8  | 24925353  |
| rs2977558 |   | 1 |   | 1 |   | 8  | 134326632 |
| rs2978508 |   | 1 |   | 1 |   | 8  | 62271508  |
| rs2978522 |   | 1 |   | 1 |   | 8  | 62357454  |
| rs2981423 |   | 1 |   | 1 |   | 18 | 74842411  |
| rs2987380 | 1 | 1 | 1 | 1 |   | 9  | 133693219 |
| rs2996011 | 1 | 1 | 1 | 1 |   | 1  | 41650003  |
| rs3001219 | 1 | 1 | 1 | 1 |   | 1  | 192838379 |
| rs3003172 |   | 1 |   | 1 |   | 20 | 62257372  |
| rs300386  | 1 | 1 | 1 | 1 |   | 2  | 141705598 |
| rs3010888 | 1 | 1 | 1 | 1 |   | 1  | 12710219  |
| rs3012844 | 1 | 1 | 1 | 1 |   | 9  | 75869159  |
| rs3024536 | 1 | 1 | 1 | 1 |   | 16 | 27260214  |
| rs303997  | 1 | 1 |   |   | 1 | 19 | 61116255  |
| rs30616   |   | 1 |   | 1 |   | 5  | 14320173  |
| rs308207  | 1 | 1 | 1 | 1 |   | 5  | 93757741  |
| rs308793  | 1 | 1 | 1 | 1 |   | 11 | 87923538  |
| rs3092802 |   | 1 |   | 1 |   | 20 | 45942280  |
| rs3099407 | 1 | 1 |   |   | 1 | 8  | 95574472  |
| rs3101043 |   | 1 |   | 1 |   | 2  | 160787681 |
| rs3101336 | 1 | 1 | 1 | 1 | 1 | 1  | 72523773  |
| rs3104965 | 1 | 1 |   |   | 1 | 8  | 96663313  |
| rs3105310 | 1 | 1 |   |   | 1 | 10 | 58546660  |
| rs310589  | 1 | 1 |   |   | 1 | 7  | 150523532 |
| rs3114018 | 1 | 1 | 1 | 1 |   | 4  | 89283605  |
| rs3115769 | 1 | 1 | 1 | 1 |   | 8  | 118814988 |
| rs312114  | 1 | 1 |   |   | 1 | 8  | 55298191  |
| rs3128495 | 1 | 1 | 1 | 1 |   | 9  | 89503537  |
| rs3132069 | 1 | 1 | 1 | 1 |   | 2  | 114592887 |
| rs3133719 | 1 | 1 | 1 | 1 |   | 8  | 101171944 |
| rs314474  |   | 1 |   | 1 |   | 11 | 114826343 |
| rs315756  | 1 | 1 |   |   | 1 | 5  | 169702667 |
| rs316582  | 1 | 1 | 1 | 1 |   | 5  | 2368086   |
| rs319660  | 1 | 1 |   |   | 1 | 1  | 82900989  |
| rs3207775 | 1 | 1 | 1 | 1 |   | 10 | 1050218   |
| rs32099   | 1 | 1 |   |   | 1 | 5  | 11332731  |
| rs3211663 | 1 | 1 | 1 | 1 |   | 9  | 91115908  |
| rs321271  |   | 1 |   | 1 |   | 1  | 96227464  |
| rs32441   | 1 | 1 | 1 | 1 |   | 5  | 100132867 |
| rs327118  | 1 | 1 | 1 | 1 |   | 13 | 28404175  |
| rs3278    |   | 1 |   | 1 |   | 3  | 27450355  |
| rs329652  | 1 | 1 | 1 | 1 |   | 11 | 133274909 |
| rs334782  | 1 | 1 | 1 | 1 |   | 3  | 3123458   |
| rs335069  | 1 | 1 | 1 | 1 |   | 4  | 183284770 |
| rs336277  |   | 1 |   | 1 |   | 18 | 27894428  |

|           |   |   |   |   |   |    |           |
|-----------|---|---|---|---|---|----|-----------|
| rs338926  | 1 | 1 | 1 | 1 |   | 1  | 58634598  |
| rs340260  | 1 | 1 | 1 | 1 |   | 3  | 160117383 |
| rs340747  | 1 | 1 | 1 | 1 | 1 | 2  | 16316196  |
| rs342042  | 1 | 1 | 1 | 1 | 1 | 3  | 6864799   |
| rs342561  | 1 | 1 |   |   | 1 | 5  | 16239774  |
| rs343043  |   | 1 |   | 1 |   | 7  | 35474907  |
| rs346650  | 1 | 1 | 1 | 1 | 1 | 5  | 135752820 |
| rs34866   | 1 | 1 |   |   | 1 | 3  | 10463362  |
| rs35043   | 1 | 1 |   |   | 1 | 12 | 31059976  |
| rs351871  |   | 1 |   | 1 |   | 5  | 77011795  |
| rs352418  | 1 | 1 | 1 | 1 |   | 8  | 28501177  |
| rs353237  |   | 1 |   | 1 |   | 5  | 148812043 |
| rs354690  | 1 | 1 | 1 | 1 |   | 2  | 143534188 |
| rs355331  | 1 | 1 |   |   | 1 | 18 | 31328218  |
| rs355739  | 1 | 1 |   |   | 1 | 5  | 39979445  |
| rs362272  | 1 | 1 |   |   | 1 | 4  | 3204778   |
| rs362346  | 1 | 1 |   |   | 1 | 14 | 72764343  |
| rs37141   | 1 | 1 |   |   | 1 | 7  | 81487410  |
| rs371513  |   | 1 |   | 1 |   | 22 | 20318599  |
| rs372197  | 1 | 1 |   |   | 1 | 16 | 85259562  |
| rs3731239 | 1 | 1 | 1 | 1 |   | 9  | 21964218  |
| rs3732114 |   | 1 |   | 1 |   | 2  | 10629729  |
| rs373531  | 1 | 1 | 1 | 1 |   | 17 | 27011628  |
| rs3735333 | 1 | 1 | 1 | 1 |   | 7  | 149196096 |
| rs3736649 | 1 | 1 | 1 | 1 |   | 8  | 42378456  |
| rs3737463 | 1 | 1 | 1 | 1 |   | 11 | 69222159  |
| rs3739530 |   | 1 |   | 1 |   | 9  | 27320514  |
| rs3740121 |   | 1 |   | 1 |   | 10 | 13878610  |
| rs3742076 | 1 | 1 | 1 | 1 |   | 12 | 2838430   |
| rs3742673 | 1 | 1 | 1 | 1 |   | 14 | 89805460  |
| rs3745509 | 1 | 1 | 1 | 1 |   | 19 | 55488717  |
| rs3748396 | 1 | 1 | 1 | 1 |   | 16 | 85918250  |
| rs3750035 | 1 | 1 | 1 | 1 |   | 7  | 127733409 |
| rs3750111 | 1 | 1 | 1 | 1 |   | 7  | 91566859  |
| rs3751834 | 1 | 1 | 1 | 1 | 1 | 16 | 77573909  |
| rs3753702 | 1 | 1 | 1 | 1 |   | 1  | 4699060   |
| rs3754230 | 1 | 1 | 1 | 1 |   | 1  | 233893206 |
| rs3757791 | 1 | 1 | 1 | 1 |   | 7  | 127020304 |
| rs37579   | 1 | 1 |   |   | 1 | 5  | 58889529  |
| rs3759041 |   | 1 |   | 1 |   | 11 | 64583663  |
| rs3759614 | 1 | 1 |   |   | 1 | 14 | 22906941  |
| rs3759794 |   | 1 |   | 1 |   | 15 | 39593950  |
| rs3759978 | 1 | 1 | 1 | 1 |   | 16 | 82778726  |
| rs3760440 | 1 | 1 | 1 | 1 |   | 17 | 32302414  |
| rs3760578 |   | 1 |   | 1 |   | 18 | 41556974  |
| rs3764622 | 1 | 1 | 1 | 1 |   | 19 | 54198202  |
| rs3765240 |   | 1 |   | 1 |   | 1  | 207984774 |
| rs3766682 | 1 | 1 |   |   | 1 | 1  | 173424461 |
| rs3769823 | 1 | 1 | 1 | 1 | 1 | 2  | 201831240 |
| rs3769885 | 1 | 1 | 1 | 1 |   | 2  | 165300636 |
| rs3770034 | 1 | 1 |   |   | 1 | 2  | 178308862 |
| rs3770305 | 1 | 1 | 1 | 1 |   | 2  | 144885647 |

|           |   |   |   |   |   |    |           |
|-----------|---|---|---|---|---|----|-----------|
| rs377318  | 1 | 1 | 1 | 1 | 1 | 13 | 21784101  |
| rs3775479 | 1 | 1 | 1 | 1 |   | 4  | 91061994  |
| rs3778526 |   | 1 |   | 1 |   | 6  | 1746389   |
| rs3778566 | 1 | 1 | 1 | 1 |   | 6  | 2158784   |
| rs3779839 | 1 | 1 |   |   | 1 | 8  | 2035925   |
| rs3780190 | 1 | 1 | 1 | 1 |   | 9  | 138238894 |
| rs3781076 |   | 1 |   | 1 |   | 10 | 12854906  |
| rs3781578 | 1 | 1 | 1 | 1 |   | 11 | 33863402  |
| rs3782267 | 1 | 1 | 1 | 1 |   | 12 | 123463106 |
| rs3782290 | 1 | 1 |   |   | 1 | 12 | 26438544  |
| rs3782814 | 1 | 1 | 1 | 1 |   | 12 | 3205386   |
| rs3786266 | 1 | 1 |   |   | 1 | 18 | 54799188  |
| rs3789224 | 1 | 1 |   |   | 1 | 6  | 24388080  |
| rs3789375 |   | 1 |   | 1 |   | 1  | 94237720  |
| rs3790116 | 1 | 1 | 1 | 1 |   | 16 | 54945545  |
| rs3791406 | 1 | 1 | 1 | 1 |   | 2  | 239695421 |
| rs3793504 | 1 | 1 | 1 | 1 |   | 9  | 2150105   |
| rs3793549 |   | 1 |   | 1 |   | 9  | 111102068 |
| rs3794018 | 1 | 1 |   |   | 1 | 11 | 8054010   |
| rs3794503 | 1 | 1 | 1 | 1 |   | 15 | 98959419  |
| rs3794624 |   | 1 |   | 1 |   | 16 | 87244575  |
| rs3794752 | 1 | 1 |   |   | 1 | 17 | 50737828  |
| rs3798236 | 1 | 1 | 1 | 1 |   | 6  | 116416342 |
| rs3798315 | 1 | 1 | 1 | 1 |   | 6  | 167464699 |
| rs3799488 | 1 | 1 |   |   | 1 | 6  | 137561473 |
| rs3803061 | 1 | 1 | 1 | 1 |   | 12 | 111699835 |
| rs3804989 | 1 | 1 | 1 | 1 | 1 | 3  | 4703008   |
| rs3806300 | 1 | 1 | 1 | 1 |   | 1  | 178738993 |
| rs3807171 | 1 | 1 | 1 | 1 |   | 7  | 37875304  |
| rs3810784 |   | 1 |   | 1 |   | 12 | 93671613  |
| rs3811485 | 1 | 1 |   |   | 1 | 1  | 228465068 |
| rs3814051 |   | 1 |   | 1 |   | 2  | 2619872   |
| rs3815210 | 1 | 1 | 1 | 1 | 1 | 12 | 119064052 |
| rs3818593 |   | 1 |   | 1 |   | 9  | 33110706  |
| rs3820039 | 1 | 1 |   |   | 1 | 1  | 86682291  |
| rs3821104 | 1 | 1 |   |   | 1 | 2  | 216766091 |
| rs3822736 |   | 1 |   | 1 |   | 5  | 35828747  |
| rs3823518 | 1 | 1 | 1 | 1 |   | 7  | 154107342 |
| rs3826782 | 1 | 1 | 1 | 1 |   | 19 | 6838736   |
| rs3826834 | 1 | 1 | 1 | 1 |   | 19 | 53186257  |
| rs3829682 |   | 1 |   | 1 |   | 19 | 9129261   |
| rs384267  | 1 | 1 | 1 | 1 |   | 5  | 41302975  |
| rs3843276 | 1 | 1 |   |   | 1 | 1  | 178837031 |
| rs3844440 |   | 1 |   | 1 |   | 19 | 52784719  |
| rs3844554 | 1 | 1 | 1 | 1 |   | 5  | 87317210  |
| rs3845974 | 1 | 1 |   |   | 1 | 3  | 60014528  |
| rs3846456 | 1 | 1 | 1 | 1 |   | 4  | 96579809  |
| rs3846677 | 1 | 1 | 1 | 1 |   | 5  | 78125189  |
| rs3847580 | 1 | 1 | 1 | 1 |   | 11 | 102695338 |
| rs3848534 | 1 | 1 |   |   | 1 | 19 | 52085632  |
| rs3849699 | 1 | 1 |   |   | 1 | 5  | 43020470  |
| rs3851014 | 1 | 1 |   |   | 1 | 16 | 12125819  |

|           |   |   |   |   |   |    |           |
|-----------|---|---|---|---|---|----|-----------|
| rs3851384 | 1 | 1 | 1 | 1 |   | 3  | 170484662 |
| rs3853362 | 1 | 1 | 1 | 1 |   | 16 | 77162332  |
| rs3856775 | 1 | 1 |   |   | 1 | 3  | 191091655 |
| rs3857176 | 1 | 1 | 1 | 1 |   | 4  | 7090246   |
| rs385773  | 1 | 1 | 1 | 1 |   | 22 | 18544589  |
| rs3858126 | 1 | 1 | 1 | 1 | 1 | 10 | 65381692  |
| rs3859532 |   | 1 |   | 1 |   | 19 | 59519060  |
| rs3861062 |   | 1 |   | 1 |   | 11 | 44601861  |
| rs387727  | 1 | 1 | 1 | 1 | 1 | 15 | 87441859  |
| rs387883  |   | 1 |   | 1 |   | 21 | 42912554  |
| rs3906692 | 1 | 1 | 1 | 1 |   | 14 | 62530413  |
| rs390755  | 1 | 1 | 1 | 1 |   | 5  | 73875573  |
| rs3912157 |   | 1 |   | 1 |   | 5  | 114149797 |
| rs3916092 | 1 | 1 | 1 | 1 | 1 | 3  | 19921061  |
| rs3916504 | 1 | 1 | 1 | 1 | 1 | 20 | 57551979  |
| rs3917862 | 1 | 1 | 1 | 1 |   | 1  | 167859737 |
| rs3918334 |   | 1 |   | 1 |   | 13 | 102776780 |
| rs3923243 | 1 | 1 | 1 | 1 | 1 | 4  | 75798477  |
| rs3925053 | 1 | 1 | 1 | 1 |   | 12 | 67718887  |
| rs3930739 |   | 1 |   | 1 |   | 15 | 25713937  |
| rs3934711 | 1 | 1 | 1 | 1 |   | 17 | 77143096  |
| rs3935801 | 1 | 1 | 1 | 1 |   | 17 | 16284495  |
| rs3936367 | 1 | 1 | 1 | 1 |   | 16 | 81106786  |
| rs3936927 | 1 | 1 |   |   | 1 | 9  | 31056983  |
| rs3937773 | 1 | 1 | 1 | 1 |   | 4  | 34891043  |
| rs39568   | 1 | 1 |   |   | 1 | 16 | 8300839   |
| rs396861  | 1 | 1 | 1 | 1 | 1 | 9  | 4733626   |
| rs397076  | 1 | 1 |   |   | 1 | 11 | 5475487   |
| rs3991319 |   | 1 |   | 1 |   | 15 | 73906147  |
| rs4007613 | 1 | 1 | 1 | 1 |   | 9  | 23151023  |
| rs400839  | 1 | 1 | 1 | 1 | 1 | 18 | 8650149   |
| rs403237  |   | 1 |   | 1 |   | 5  | 110912897 |
| rs4034732 |   | 1 |   | 1 |   | 2  | 154611346 |
| rs403552  | 1 | 1 |   |   | 1 | 4  | 69647619  |
| rs4045344 |   | 1 |   | 1 |   | 5  | 648870    |
| rs4052984 |   | 1 |   | 1 |   | 1  | 96601142  |
| rs4072374 | 1 | 1 | 1 | 1 |   | 2  | 3564846   |
| rs4072868 | 1 | 1 |   |   | 1 | 1  | 12551058  |
| rs4074499 | 1 | 1 | 1 | 1 |   | 3  | 195387100 |
| rs4074516 |   | 1 |   | 1 |   | 11 | 27422167  |
| rs4074967 | 1 | 1 | 1 | 1 |   | 12 | 5470727   |
| rs4075242 | 1 | 1 |   |   | 1 | 11 | 130025759 |
| rs4077378 |   | 1 |   | 1 |   | 14 | 104094557 |
| rs407758  | 1 | 1 | 1 | 1 |   | 5  | 132963319 |
| rs4083132 | 1 | 1 | 1 | 1 |   | 3  | 133348477 |
| rs410349  | 1 | 1 | 1 | 1 |   | 21 | 27157065  |
| rs4128688 | 1 | 1 | 1 | 1 | 1 | 4  | 119008040 |
| rs4129526 | 1 | 1 | 1 | 1 |   | 13 | 89865302  |
| rs4130719 | 1 | 1 | 1 | 1 |   | 5  | 163799588 |
| rs4131364 | 1 | 1 | 1 | 1 | 1 | 11 | 802188    |
| rs4141463 | 1 | 1 |   |   | 1 | 20 | 14695471  |
| rs4141774 | 1 | 1 | 1 | 1 |   | 13 | 29389900  |

|           |   |   |   |   |   |    |           |
|-----------|---|---|---|---|---|----|-----------|
| rs41420   | 1 | 1 | 1 | 1 | 1 | 2  | 72255762  |
| rs4144624 | 1 | 1 | 1 | 1 |   | 13 | 53015313  |
| rs4145205 | 1 | 1 |   |   | 1 | 10 | 35823506  |
| rs4148298 | 1 | 1 | 1 | 1 |   | 4  | 70499290  |
| rs4148328 | 1 | 1 |   |   | 1 | 2  | 234342398 |
| rs419218  | 1 | 1 | 1 | 1 |   | 9  | 135860608 |
| rs422172  | 1 | 1 |   |   | 1 | 5  | 178682983 |
| rs4233167 | 1 | 1 | 1 | 1 |   | 1  | 174688896 |
| rs4233629 | 1 | 1 | 1 | 1 |   | 2  | 237768857 |
| rs4234474 | 1 | 1 | 1 | 1 |   | 3  | 140910130 |
| rs4236885 |   | 1 |   | 1 |   | 8  | 140580256 |
| rs4238484 |   | 1 |   | 1 |   | 15 | 90871916  |
| rs4238802 | 1 | 1 | 1 | 1 | 1 | 16 | 57705443  |
| rs4239364 | 1 | 1 |   |   | 1 | 18 | 26674332  |
| rs4240248 | 1 | 1 |   |   | 1 | 4  | 38593309  |
| rs4241407 | 1 | 1 | 1 | 1 |   | 3  | 49575323  |
| rs4241627 | 1 | 1 | 1 | 1 |   | 4  | 167961173 |
| rs4242202 | 1 | 1 | 1 | 1 |   | 5  | 175988626 |
| rs4242426 | 1 | 1 | 1 | 1 |   | 8  | 25854996  |
| rs4242689 | 1 | 1 |   |   | 1 | 9  | 27716731  |
| rs4243459 |   | 1 |   | 1 |   | 6  | 139387442 |
| rs424765  | 1 | 1 |   |   | 1 | 22 | 16866017  |
| rs425140  | 1 | 1 |   |   | 1 | 8  | 90933795  |
| rs4257073 | 1 | 1 | 1 | 1 |   | 12 | 57957655  |
| rs4259484 | 1 | 1 | 1 | 1 |   | 9  | 112525823 |
| rs4260216 | 1 | 1 | 1 | 1 | 1 | 2  | 11452974  |
| rs4261956 | 1 | 1 | 1 | 1 | 1 | 4  | 72560728  |
| rs4278155 | 1 | 1 | 1 | 1 |   | 8  | 23052724  |
| rs427832  | 1 | 1 | 1 | 1 |   | 3  | 149949053 |
| rs4278683 | 1 | 1 | 1 | 1 |   | 15 | 57586570  |
| rs4279237 | 1 | 1 | 1 | 1 |   | 4  | 123228624 |
| rs4283980 | 1 | 1 | 1 | 1 |   | 7  | 104213047 |
| rs42985   | 1 | 1 | 1 | 1 |   | 7  | 91236477  |
| rs43041   | 1 | 1 | 1 | 1 |   | 7  | 94908774  |
| rs4304313 | 1 | 1 | 1 | 1 |   | 8  | 133130328 |
| rs4308943 | 1 | 1 | 1 | 1 |   | 1  | 38020325  |
| rs4313606 | 1 | 1 | 1 | 1 |   | 18 | 43811949  |
| rs4321843 | 1 | 1 | 1 | 1 |   | 6  | 127625101 |
| rs4327428 | 1 | 1 |   |   | 1 | 3  | 45784333  |
| rs4331170 | 1 | 1 | 1 | 1 |   | 12 | 117968920 |
| rs4331742 | 1 | 1 | 1 | 1 |   | 4  | 88379276  |
| rs4334271 | 1 | 1 | 1 | 1 |   | 15 | 38423749  |
| rs4341514 | 1 | 1 |   |   | 1 | 11 | 2098179   |
| rs4346021 | 1 | 1 |   |   | 1 | 12 | 17751982  |
| rs4348312 | 1 | 1 |   |   | 1 | 6  | 36940006  |
| rs4355755 | 1 | 1 |   |   | 1 | 8  | 124996892 |
| rs4361533 | 1 | 1 |   |   | 1 | 5  | 177784229 |
| rs4368537 | 1 | 1 | 1 | 1 |   | 3  | 31256621  |
| rs4374114 | 1 | 1 | 1 | 1 |   | 15 | 28081081  |
| rs4388301 |   | 1 |   | 1 |   | 6  | 138324068 |
| rs4388962 |   | 1 |   | 1 |   | 12 | 38521912  |
| rs4389435 | 1 | 1 |   |   | 1 | 3  | 38055105  |

|           |   |   |   |   |   |    |           |
|-----------|---|---|---|---|---|----|-----------|
| rs4390004 | 1 | 1 | 1 | 1 |   | 9  | 95515400  |
| rs4391081 | 1 | 1 | 1 | 1 |   | 4  | 185211312 |
| rs439863  | 1 | 1 |   |   | 1 | 4  | 22441780  |
| rs439881  | 1 | 1 |   |   | 1 | 19 | 44911402  |
| rs4399999 | 1 | 1 |   |   | 1 | 4  | 38030695  |
| rs4403789 | 1 | 1 | 1 | 1 |   | 11 | 17687639  |
| rs4411234 | 1 | 1 | 1 | 1 |   | 10 | 85211638  |
| rs4411562 | 1 | 1 |   |   | 1 | 17 | 73559207  |
| rs4411615 | 1 | 1 |   |   | 1 | 19 | 58424913  |
| rs4413448 |   | 1 |   | 1 |   | 4  | 32131629  |
| rs4425488 | 1 | 1 |   |   | 1 | 5  | 75330102  |
| rs4436177 | 1 | 1 | 1 | 1 |   | 9  | 105527574 |
| rs4443343 | 1 | 1 | 1 | 1 |   | 4  | 136974586 |
| rs445275  | 1 | 1 | 1 | 1 |   | 4  | 3712796   |
| rs4456886 | 1 | 1 |   |   | 1 | 3  | 136452627 |
| rs4457655 | 1 | 1 | 1 | 1 |   | 10 | 8966210   |
| rs4459724 | 1 | 1 | 1 | 1 |   | 2  | 220743566 |
| rs4464717 |   | 1 |   | 1 |   | 5  | 164830256 |
| rs4467935 | 1 | 1 |   |   | 1 | 8  | 15917535  |
| rs4470902 |   | 1 |   | 1 |   | 7  | 17974835  |
| rs4471501 | 1 | 1 | 1 | 1 |   | 12 | 49711619  |
| rs4471960 |   | 1 |   | 1 |   | 20 | 8398247   |
| rs4475089 | 1 | 1 | 1 | 1 |   | 4  | 177328823 |
| rs4475229 | 1 | 1 | 1 | 1 |   | 5  | 26305806  |
| rs447990  |   | 1 |   | 1 |   | 4  | 88252376  |
| rs4480424 | 1 | 1 | 1 | 1 |   | 1  | 209984738 |
| rs448247  | 1 | 1 |   |   | 1 | 10 | 30936837  |
| rs4482907 | 1 | 1 |   |   | 1 | 5  | 18795308  |
| rs4494115 |   | 1 |   | 1 |   | 1  | 244814209 |
| rs4498289 | 1 | 1 |   |   | 1 | 5  | 159601881 |
| rs4503376 | 1 | 1 |   |   | 1 | 1  | 108070153 |
| rs4506553 |   | 1 |   | 1 |   | 10 | 122364634 |
| rs4509106 | 1 | 1 | 1 | 1 |   | 6  | 55631183  |
| rs4517938 | 1 | 1 | 1 | 1 |   | 2  | 184595675 |
| rs4520584 |   | 1 |   | 1 |   | 11 | 28568968  |
| rs4521229 | 1 | 1 | 1 | 1 |   | 3  | 181973610 |
| rs4522353 | 1 | 1 |   |   | 1 | 14 | 75814874  |
| rs4522658 |   | 1 |   | 1 |   | 2  | 134203633 |
| rs452854  | 1 | 1 | 1 | 1 |   | 6  | 95053242  |
| rs4529531 |   | 1 |   | 1 |   | 9  | 80580984  |
| rs4535234 | 1 | 1 | 1 | 1 | 1 | 3  | 110097182 |
| rs4536588 | 1 | 1 | 1 | 1 | 1 | 19 | 724437    |
| rs4540044 | 1 | 1 |   |   | 1 | 4  | 19154970  |
| rs4541274 |   | 1 |   | 1 |   | 2  | 79826944  |
| rs45426   |   | 1 |   | 1 |   | 4  | 163113553 |
| rs4545389 |   | 1 |   | 1 |   | 1  | 96051833  |
| rs4556519 |   | 1 |   | 1 |   | 11 | 7528090   |
| rs4558468 |   | 1 |   | 1 |   | 17 | 63681642  |
| rs4561129 | 1 | 1 | 1 | 1 |   | 10 | 113106988 |
| rs4565458 | 1 | 1 | 1 | 1 | 1 | 8  | 22210078  |
| rs4567639 | 1 | 1 |   |   | 1 | 14 | 83785548  |
| rs4568821 | 1 | 1 | 1 | 1 |   | 1  | 237532970 |

|           |   |   |   |   |   |    |           |
|-----------|---|---|---|---|---|----|-----------|
| rs4571660 | 1 | 1 | 1 | 1 | 1 | 7  | 147356394 |
| rs4574434 | 1 | 1 | 1 | 1 | 1 | 4  | 115958877 |
| rs4577166 | 1 | 1 | 1 | 1 |   | 18 | 36220895  |
| rs4578433 |   | 1 |   | 1 |   | 12 | 83335062  |
| rs458036  | 1 | 1 |   |   | 1 | 5  | 55851838  |
| rs4586385 | 1 | 1 | 1 | 1 |   | 15 | 35633096  |
| rs4589531 |   | 1 |   | 1 |   | 15 | 89727339  |
| rs4596664 | 1 | 1 | 1 | 1 |   | 8  | 25530628  |
| rs4603608 | 1 | 1 |   |   | 1 | 17 | 76003020  |
| rs4605857 | 1 | 1 |   |   | 1 | 6  | 162485708 |
| rs4607068 | 1 | 1 | 1 | 1 |   | 3  | 140645684 |
| rs4625093 | 1 | 1 |   |   | 1 | 9  | 108632599 |
| rs4626186 | 1 | 1 | 1 | 1 |   | 4  | 25133185  |
| rs4627009 |   | 1 |   | 1 |   | 10 | 111318225 |
| rs4627206 |   | 1 |   | 1 |   | 13 | 67959686  |
| rs4634634 | 1 | 1 | 1 | 1 | 1 | 8  | 74431380  |
| rs4636972 | 1 | 1 | 1 | 1 |   | 17 | 1045474   |
| rs4643673 |   | 1 |   | 1 |   | 3  | 148129994 |
| rs4651195 |   | 1 |   | 1 |   | 1  | 182498314 |
| rs4652192 | 1 | 1 | 1 | 1 |   | 1  | 175014759 |
| rs4654492 | 1 | 1 |   |   | 1 | 1  | 4101675   |
| rs4654773 | 1 | 1 | 1 | 1 |   | 1  | 22124849  |
| rs4655463 | 1 | 1 |   |   | 1 | 1  | 211938676 |
| rs4658702 | 1 | 1 | 1 | 1 |   | 1  | 243356734 |
| rs4660438 | 1 | 1 | 1 | 1 |   | 1  | 40823539  |
| rs4663369 | 1 | 1 |   |   | 1 | 2  | 234846443 |
| rs4664352 |   | 1 |   | 1 |   | 2  | 161244689 |
| rs4666052 | 1 | 1 |   |   | 1 | 2  | 28384224  |
| rs4666461 |   | 1 |   | 1 |   | 2  | 19176730  |
| rs4668631 |   | 1 |   | 1 |   | 2  | 9750675   |
| rs4669453 | 1 | 1 |   |   | 1 | 2  | 9826352   |
| rs4672498 | 1 | 1 | 1 | 1 |   | 2  | 62377382  |
| rs4678297 | 1 | 1 | 1 | 1 | 1 | 3  | 138389801 |
| rs4681269 |   | 1 |   | 1 |   | 3  | 147013257 |
| rs4682664 | 1 | 1 | 1 | 1 |   | 3  | 135402599 |
| rs4684146 | 1 | 1 | 1 | 1 |   | 3  | 1399745   |
| rs4686053 | 1 | 1 |   |   | 1 | 3  | 6394564   |
| rs4688104 | 1 | 1 | 1 | 1 |   | 3  | 119637216 |
| rs4688470 |   | 1 |   | 1 |   | 3  | 64472391  |
| rs4688888 | 1 | 1 | 1 | 1 |   | 3  | 86304037  |
| rs4689741 | 1 | 1 |   |   | 1 | 4  | 7472399   |
| rs4689786 |   | 1 |   | 1 |   | 4  | 7635460   |
| rs4691    | 1 | 1 | 1 | 1 | 1 | 10 | 75231922  |
| rs4691161 |   | 1 |   | 1 |   | 4  | 166273389 |
| rs4692386 | 1 | 1 |   |   | 1 | 4  | 25741459  |
| rs4693421 | 1 | 1 | 1 | 1 |   | 4  | 83238420  |
| rs4695913 | 1 | 1 |   |   | 1 | 4  | 175322835 |
| rs4697041 | 1 | 1 |   |   | 1 | 4  | 23212476  |
| rs4697653 | 1 | 1 | 1 | 1 |   | 4  | 10337857  |
| rs4698844 | 1 | 1 | 1 | 1 |   | 4  | 103437003 |
| rs4699356 | 1 | 1 | 1 | 1 |   | 4  | 99760306  |
| rs4701241 | 1 | 1 | 1 | 1 |   | 5  | 23999203  |

|           |   |   |   |   |   |    |           |
|-----------|---|---|---|---|---|----|-----------|
| rs4703415 | 1 | 1 | 1 | 1 |   | 5  | 35624846  |
| rs4703825 | 1 | 1 |   |   | 1 | 5  | 80515666  |
| rs4704262 | 1 | 1 | 1 | 1 |   | 5  | 75227206  |
| rs470490  | 1 | 1 | 1 | 1 |   | 18 | 61182216  |
| rs4705295 | 1 | 1 | 1 | 1 |   | 5  | 145769299 |
| rs4706013 | 1 | 1 |   |   | 1 | 5  | 130600760 |
| rs4708459 | 1 | 1 | 1 | 1 |   | 6  | 168503418 |
| rs4713949 | 1 | 1 | 1 | 1 |   | 6  | 36369863  |
| rs4714000 | 1 | 1 | 1 | 1 |   | 6  | 36745575  |
| rs4715407 | 1 | 1 |   |   | 1 | 6  | 53501693  |
| rs4716836 | 1 | 1 |   |   | 1 | 7  | 157441344 |
| rs4720629 | 1 | 1 |   |   | 1 | 7  | 5441935   |
| rs4720971 | 1 | 1 | 1 | 1 |   | 7  | 11337670  |
| rs4722692 | 1 | 1 | 1 | 1 |   | 7  | 27358109  |
| rs472465  | 1 | 1 | 1 | 1 |   | 11 | 110974172 |
| rs4727857 | 1 | 1 | 1 | 1 |   | 7  | 117339632 |
| rs4728395 | 1 | 1 | 1 | 1 |   | 7  | 135812103 |
| rs4730287 | 1 | 1 | 1 | 1 | 1 | 7  | 107557860 |
| rs4733476 | 1 | 1 |   |   | 1 | 8  | 30288664  |
| rs4734291 | 1 | 1 | 1 | 1 |   | 8  | 95889770  |
| rs4736285 | 1 | 1 | 1 | 1 |   | 8  | 139938492 |
| rs4736413 | 1 | 1 | 1 | 1 | 1 | 8  | 133395104 |
| rs4737409 | 1 | 1 | 1 | 1 |   | 8  | 75297704  |
| rs4737732 |   | 1 |   | 1 |   | 8  | 66496182  |
| rs4738563 | 1 | 1 | 1 | 1 |   | 8  | 58115324  |
| rs4740358 | 1 | 1 | 1 | 1 |   | 9  | 132557580 |
| rs4740988 | 1 | 1 | 1 | 1 |   | 9  | 9773693   |
| rs4741573 | 1 | 1 | 1 | 1 |   | 9  | 1658686   |
| rs4741859 | 1 | 1 | 1 | 1 |   | 9  | 3831216   |
| rs4743347 |   | 1 |   | 1 |   | 9  | 101215661 |
| rs4743564 | 1 | 1 | 1 | 1 |   | 9  | 104387268 |
| rs4744188 | 1 | 1 |   |   | 1 | 9  | 94990282  |
| rs4745466 | 1 | 1 | 1 | 1 |   | 9  | 70793943  |
| rs4746093 |   | 1 |   | 1 |   | 10 | 73079984  |
| rs4746826 | 1 | 1 | 1 | 1 | 1 | 10 | 70655656  |
| rs4747860 | 1 | 1 | 1 | 1 |   | 10 | 10580170  |
| rs4748457 | 1 | 1 | 1 | 1 |   | 10 | 18712151  |
| rs474908  | 1 | 1 |   |   | 1 | 11 | 35025967  |
| rs4749829 | 1 | 1 |   |   | 1 | 10 | 9078140   |
| rs4749999 |   | 1 |   | 1 |   | 10 | 10955796  |
| rs4750267 | 1 | 1 | 1 | 1 |   | 10 | 12887844  |
| rs4751140 | 1 | 1 |   |   | 1 | 10 | 131554098 |
| rs4751890 | 1 | 1 | 1 | 1 |   | 10 | 124151781 |
| rs4757292 |   | 1 |   | 1 |   | 11 | 15120693  |
| rs4760557 | 1 | 1 |   |   | 1 | 12 | 127794683 |
| rs4760980 | 1 | 1 |   |   | 1 | 12 | 126628924 |
| rs4764589 | 1 | 1 |   |   | 1 | 12 | 6402543   |
| rs4764852 |   | 1 |   | 1 |   | 12 | 100859261 |
| rs4765316 | 1 | 1 |   |   | 1 | 12 | 123203243 |
| rs4766329 | 1 | 1 |   |   | 1 | 12 | 5012514   |
| rs4767541 | 1 | 1 |   |   | 1 | 12 | 116361493 |
| rs4769648 | 1 | 1 |   |   | 1 | 13 | 28416969  |

|           |   |   |   |   |   |    |           |
|-----------|---|---|---|---|---|----|-----------|
| rs4771057 | 1 | 1 |   |   | 1 | 13 | 26479876  |
| rs4771561 | 1 | 1 | 1 | 1 |   | 13 | 106682364 |
| rs4773116 | 1 | 1 | 1 | 1 |   | 13 | 109511453 |
| rs4773668 |   | 1 |   | 1 |   | 13 | 91598223  |
| rs4775359 | 1 | 1 | 1 | 1 |   | 15 | 59175796  |
| rs477627  | 1 | 1 | 1 | 1 | 1 | 20 | 47613465  |
| rs4776567 | 1 | 1 | 1 | 1 |   | 15 | 69756906  |
| rs4778232 |   | 1 |   | 1 |   | 15 | 25955360  |
| rs4779012 | 1 | 1 |   |   | 1 | 15 | 77297964  |
| rs4781011 |   | 1 |   | 1 |   | 16 | 10882812  |
| rs478178  | 1 | 1 | 1 | 1 |   | 18 | 39242540  |
| rs4781927 | 1 | 1 | 1 | 1 |   | 16 | 17803882  |
| rs4782593 |   | 1 |   | 1 |   | 16 | 82816740  |
| rs4784454 | 1 | 1 | 1 | 1 |   | 16 | 53593045  |
| rs4785173 | 1 | 1 | 1 | 1 |   | 16 | 48052382  |
| rs4785310 | 1 | 1 |   |   | 1 | 16 | 48061667  |
| rs4786780 | 1 | 1 | 1 | 1 |   | 16 | 5809388   |
| rs4794922 | 1 | 1 |   |   | 1 | 17 | 27769855  |
| rs4795682 | 1 | 1 | 1 | 1 |   | 17 | 27594049  |
| rs4796362 | 1 | 1 |   |   | 1 | 17 | 6752253   |
| rs479690  | 1 | 1 |   |   | 1 | 8  | 102664443 |
| rs4798131 |   | 1 |   | 1 |   | 18 | 3779544   |
| rs4799200 |   | 1 |   | 1 |   | 18 | 74650046  |
| rs4799268 | 1 | 1 | 1 | 1 | 1 | 18 | 73997172  |
| rs4800343 | 1 | 1 |   |   | 1 | 18 | 17857011  |
| rs480752  | 1 | 1 |   |   | 1 | 1  | 180054407 |
| rs4807928 | 1 | 1 | 1 | 1 |   | 19 | 1399180   |
| rs4808416 | 1 | 1 | 1 | 1 |   | 19 | 15928789  |
| rs4811158 | 1 | 1 | 1 | 1 | 1 | 20 | 49383424  |
| rs4813802 | 1 | 1 | 1 | 1 |   | 20 | 6647595   |
| rs4814983 | 1 | 1 | 1 | 1 |   | 20 | 2065462   |
| rs4816051 | 1 | 1 |   |   | 1 | 20 | 821749    |
| rs4818059 | 1 | 1 | 1 | 1 |   | 21 | 39864658  |
| rs4819591 | 1 | 1 | 1 | 1 |   | 22 | 16327371  |
| rs483241  | 1 | 1 | 1 | 1 |   | 22 | 25973302  |
| rs4832680 | 1 | 1 | 1 | 1 |   | 2  | 16940474  |
| rs4833095 | 1 | 1 | 1 | 1 |   | 4  | 38476105  |
| rs4835726 |   | 1 |   | 1 |   | 5  | 138761710 |
| rs4839485 | 1 | 1 |   |   | 1 | 1  | 116139187 |
| rs4843426 | 1 | 1 | 1 | 1 |   | 16 | 85300922  |
| rs4843792 | 1 | 1 |   |   | 1 | 16 | 86673631  |
| rs4845663 | 1 | 1 |   |   | 1 | 1  | 152958712 |
| rs4845835 | 1 | 1 | 1 | 1 |   | 1  | 5550499   |
| rs4846028 | 1 | 1 |   |   | 1 | 1  | 11702086  |
| rs4849144 | 1 | 1 | 1 | 1 |   | 2  | 113516520 |
| rs484959  |   | 1 |   | 1 |   | 1  | 110167606 |
| rs4851079 |   | 1 |   | 1 |   | 2  | 105624457 |
| rs4851218 | 1 | 1 | 1 | 1 |   | 2  | 99624775  |
| rs4851675 |   | 1 |   | 1 |   | 2  | 104222580 |
| rs4852808 |   | 1 |   | 1 |   | 2  | 71665963  |
| rs4854428 | 1 | 1 |   |   | 1 | 2  | 904015    |
| rs4854502 | 1 | 1 | 1 | 1 |   | 2  | 68818582  |

|           |   |   |   |   |   |    |           |
|-----------|---|---|---|---|---|----|-----------|
| rs4854647 | 1 | 1 | 1 | 1 |   | 3  | 132731131 |
| rs4857192 | 1 | 1 | 1 | 1 |   | 3  | 97528441  |
| rs4859259 | 1 | 1 | 1 | 1 | 1 | 3  | 184147241 |
| rs4859682 | 1 | 1 |   |   | 1 | 4  | 77629342  |
| rs4859864 | 1 | 1 | 1 | 1 |   | 4  | 78763351  |
| rs4861358 |   | 1 |   | 1 |   | 4  | 40710656  |
| rs4861602 | 1 | 1 | 1 | 1 |   | 4  | 185279783 |
| rs4863633 | 1 | 1 |   |   | 1 | 4  | 140324831 |
| rs4863689 | 1 | 1 |   |   | 1 | 4  | 140939092 |
| rs4869578 | 1 | 1 | 1 | 1 |   | 5  | 38257417  |
| rs4871195 | 1 | 1 | 1 | 1 | 1 | 8  | 122567434 |
| rs487208  | 1 | 1 |   |   | 1 | 1  | 213209901 |
| rs4876754 | 1 | 1 | 1 | 1 |   | 8  | 118875604 |
| rs4877314 |   | 1 |   | 1 |   | 9  | 88109273  |
| rs4879847 | 1 | 1 | 1 | 1 |   | 9  | 34973974  |
| rs4886026 | 1 | 1 | 1 | 1 |   | 13 | 57141569  |
| rs4886402 | 1 | 1 |   |   | 1 | 13 | 61722555  |
| rs4887111 | 1 | 1 | 1 | 1 |   | 15 | 71815338  |
| rs4887443 | 1 | 1 | 1 | 1 |   | 15 | 84312988  |
| rs4890891 | 1 | 1 | 1 | 1 |   | 18 | 72940917  |
| rs4891825 | 1 | 1 | 1 | 1 |   | 18 | 66018643  |
| rs4894535 | 1 | 1 | 1 | 1 |   | 3  | 173478299 |
| rs489466  | 1 | 1 | 1 | 1 |   | 10 | 84638946  |
| rs4896634 | 1 | 1 | 1 | 1 |   | 6  | 143657195 |
| rs4896663 | 1 | 1 | 1 | 1 | 1 | 6  | 143874819 |
| rs4897646 | 1 | 1 | 1 | 1 |   | 8  | 135034253 |
| rs4897704 |   | 1 |   | 1 |   | 8  | 135332062 |
| rs4901327 | 1 | 1 |   |   | 1 | 14 | 52539384  |
| rs4902059 | 1 | 1 | 1 | 1 |   | 14 | 60971079  |
| rs4902562 | 1 | 1 | 1 | 1 |   | 14 | 67801211  |
| rs4903820 | 1 | 1 | 1 | 1 |   | 14 | 78604005  |
| rs4907404 | 1 | 1 | 1 | 1 |   | 8  | 142635782 |
| rs4909520 |   | 1 |   | 1 |   | 8  | 136857320 |
| rs4911442 | 1 | 1 | 1 | 1 |   | 20 | 32818707  |
| rs4914938 |   | 1 |   | 1 |   | 1  | 107309990 |
| rs4915886 | 1 | 1 | 1 | 1 |   | 1  | 63449848  |
| rs4916113 | 1 | 1 | 1 | 1 | 1 | 1  | 246443915 |
| rs4916622 | 1 | 1 | 1 | 1 |   | 4  | 3657158   |
| rs4916821 |   | 1 |   | 1 |   | 5  | 90126155  |
| rs4916932 | 1 | 1 |   |   | 1 | 7  | 223289    |
| rs4918844 | 1 | 1 | 1 | 1 |   | 10 | 115309701 |
| rs4920104 | 1 | 1 | 1 | 1 |   | 21 | 42737588  |
| rs4923373 | 1 | 1 |   |   | 1 | 11 | 26635787  |
| rs4926244 | 1 | 1 | 1 | 1 |   | 19 | 13235913  |
| rs4935848 | 1 | 1 |   |   | 1 | 11 | 123195542 |
| rs4936578 | 1 | 1 | 1 | 1 |   | 11 | 120504468 |
| rs4936969 | 1 | 1 | 1 | 1 | 1 | 11 | 124395606 |
| rs4937688 | 1 | 1 | 1 | 1 |   | 11 | 131640706 |
| rs4941246 | 1 | 1 | 1 | 1 | 1 | 18 | 59953284  |
| rs4943731 | 1 | 1 | 1 | 1 |   | 13 | 39610941  |
| rs4944000 | 1 | 1 | 1 | 1 |   | 11 | 87137527  |
| rs4945734 | 1 | 1 |   |   | 1 | 6  | 106465725 |

|           |   |   |   |   |   |    |           |
|-----------|---|---|---|---|---|----|-----------|
| rs494723  |   | 1 |   | 1 |   | 6  | 10854213  |
| rs4948235 | 1 | 1 | 1 | 1 |   | 10 | 61055737  |
| rs495192  |   | 1 |   | 1 |   | 11 | 95671125  |
| rs4953456 | 1 | 1 | 1 | 1 |   | 2  | 47144074  |
| rs4954130 |   | 1 |   | 1 |   | 2  | 134775202 |
| rs495441  |   | 1 |   | 1 |   | 6  | 24096306  |
| rs4955713 | 1 | 1 | 1 | 1 |   | 3  | 168438613 |
| rs4956433 |   | 1 |   | 1 |   | 4  | 143204339 |
| rs4960102 | 1 | 1 | 1 | 1 |   | 6  | 5513837   |
| rs4960257 | 1 | 1 | 1 | 1 | 1 | 6  | 6810243   |
| rs4961333 | 1 | 1 | 1 | 1 |   | 8  | 142251826 |
| rs496368  |   | 1 |   | 1 |   | 11 | 131318317 |
| rs4964290 |   | 1 |   | 1 |   | 12 | 103368315 |
| rs4965002 | 1 | 1 | 1 | 1 |   | 12 | 130870012 |
| rs4965479 | 1 | 1 |   |   | 1 | 15 | 97756786  |
| rs4968938 | 1 | 1 | 1 | 1 |   | 17 | 64242851  |
| rs4969481 | 1 | 1 |   |   | 1 | 17 | 77586501  |
| rs4970551 | 1 | 1 |   |   | 1 | 1  | 38771426  |
| rs4972382 | 1 | 1 |   |   | 1 | 2  | 149060899 |
| rs497321  | 1 | 1 | 1 | 1 |   | 15 | 51191215  |
| rs4974389 | 1 | 1 | 1 | 1 |   | 3  | 150386613 |
| rs4976897 | 1 | 1 | 1 | 1 |   | 8  | 37827056  |
| rs4977338 | 1 | 1 |   |   | 1 | 9  | 18708086  |
| rs4981674 | 1 | 1 | 1 | 1 |   | 14 | 28140136  |
| rs4981701 | 1 | 1 |   |   | 1 | 14 | 28988865  |
| rs4982420 | 1 | 1 | 1 | 1 | 1 | 14 | 20705711  |
| rs4987764 | 1 | 1 | 1 | 1 |   | 18 | 59059112  |
| rs498931  |   | 1 |   | 1 |   | 11 | 69048798  |
| rs498939  | 1 | 1 | 1 | 1 |   | 1  | 24592278  |
| rs499437  | 1 | 1 | 1 | 1 | 1 | 10 | 78663949  |
| rs4997672 | 1 | 1 | 1 | 1 |   | 7  | 71150234  |
| rs5003944 |   | 1 |   | 1 |   | 10 | 87880306  |
| rs500906  | 1 | 1 | 1 | 1 |   | 6  | 163358464 |
| rs5017692 |   | 1 |   | 1 |   | 15 | 33803377  |
| rs504341  | 1 | 1 | 1 | 1 |   | 11 | 95190489  |
| rs505892  |   | 1 |   | 1 |   | 1  | 91710283  |
| rs505922  | 1 | 1 | 1 | 1 |   | 9  | 135139050 |
| rs508859  |   | 1 |   | 1 |   | 11 | 72608454  |
| rs509936  | 1 | 1 | 1 | 1 |   | 11 | 60614607  |
| rs513268  |   | 1 |   | 1 |   | 11 | 72866813  |
| rs515639  |   | 1 |   | 1 |   | 12 | 221584    |
| rs516925  | 1 | 1 | 1 | 1 |   | 7  | 16559608  |
| rs518136  | 1 | 1 | 1 | 1 |   | 7  | 17047682  |
| rs522145  | 1 | 1 | 1 | 1 |   | 16 | 87491357  |
| rs525721  | 1 | 1 |   |   | 1 | 11 | 131334963 |
| rs527507  | 1 | 1 | 1 | 1 |   | 6  | 109234577 |
| rs528065  | 1 | 1 |   |   | 1 | 2  | 23712954  |
| rs530855  | 1 | 1 | 1 | 1 |   | 13 | 75235781  |
| rs531539  | 1 | 1 | 1 | 1 |   | 11 | 99651302  |
| rs536477  | 1 | 1 | 1 | 1 |   | 1  | 238112531 |
| rs537148  |   | 1 |   | 1 |   | 8  | 12966483  |
| rs538499  | 1 | 1 | 1 | 1 | 1 | 1  | 236120147 |



|           |   |   |   |   |   |    |           |           |
|-----------|---|---|---|---|---|----|-----------|-----------|
| rs6076954 | 1 | 1 | 1 | 1 | 1 | 20 | 6085310   |           |
| rs608082  | 1 | 1 | 1 | 1 | 1 | 1  | 217195551 |           |
| rs6081765 | 1 | 1 |   |   | 1 | 1  | 1983775   |           |
| rs608406  |   | 1 |   | 1 | 1 | 18 | 9640391   |           |
| rs608706  | 1 | 1 |   |   | 1 | 1  | 93688433  |           |
| rs6087534 | 1 | 1 | 1 | 1 | 1 | 20 | 31907635  |           |
| rs608825  | 1 | 1 |   |   | 1 | 1  | 234635393 |           |
| rs6089232 | 1 | 1 | 1 | 1 | 1 | 20 | 60516335  |           |
| rs6089457 | 1 | 1 | 1 | 1 | 1 | 20 | 59670346  |           |
| rs6089784 | 1 | 1 | 1 | 1 | 1 | 20 | 60870007  |           |
| rs6092326 | 1 | 1 | 1 | 1 | 1 | 1  | 20        | 54550144  |
| rs6092900 | 1 | 1 | 1 | 1 | 1 | 1  | 20        | 58217893  |
| rs609305  | 1 | 1 | 1 | 1 | 1 | 1  | 11        | 118897864 |
| rs6093323 | 1 | 1 | 1 | 1 | 1 | 1  | 20        | 38361012  |
| rs6093494 | 1 | 1 | 1 | 1 | 1 | 1  | 20        | 39592913  |
| rs6094916 | 1 | 1 |   |   | 1 | 1  | 20        | 46002408  |
| rs6100966 | 1 | 1 |   |   | 1 | 1  | 20        | 58568113  |
| rs6103041 |   | 1 |   | 1 | 1 | 1  | 20        | 40845679  |
| rs6105221 | 1 | 1 | 1 | 1 | 1 | 1  | 20        | 14119905  |
| rs6109533 | 1 | 1 |   |   | 1 | 1  | 20        | 12672326  |
| rs6115227 | 1 | 1 | 1 | 1 | 1 | 1  | 20        | 25539377  |
| rs6115535 | 1 | 1 |   |   | 1 | 1  | 20        | 26061643  |
| rs6116934 |   | 1 |   | 1 | 1 | 1  | 20        | 5679803   |
| rs6118234 | 1 | 1 | 1 | 1 | 1 | 1  | 20        | 8457458   |
| rs6126462 | 1 | 1 | 1 | 1 | 1 | 1  | 20        | 35958790  |
| rs6129532 | 1 | 1 | 1 | 1 | 1 | 1  | 20        | 38317602  |
| rs6133219 | 1 | 1 | 1 | 1 | 1 | 1  | 20        | 5443069   |
| rs6133564 |   | 1 |   | 1 | 1 | 1  | 20        | 8201285   |
| rs613479  | 1 | 1 | 1 | 1 | 1 | 1  | 15        | 32146482  |
| rs621917  | 1 | 1 | 1 | 1 | 1 | 1  | 18        | 60999110  |
| rs624988  | 1 | 1 | 1 | 1 | 1 | 1  | 1         | 117065313 |
| rs626364  | 1 | 1 | 1 | 1 | 1 | 1  | 3         | 120755573 |
| rs628031  |   | 1 |   | 1 | 1 | 1  | 6         | 160480835 |
| rs628629  |   | 1 |   | 1 | 1 | 1  | 6         | 83951101  |
| rs629081  |   | 1 |   | 1 | 1 | 1  | 18        | 71035025  |
| rs6312    | 1 | 1 | 1 | 1 | 1 | 1  | 13        | 46368825  |
| rs631661  | 1 | 1 | 1 | 1 | 1 | 1  | 6         | 16864985  |
| rs632853  | 1 | 1 | 1 | 1 | 1 | 1  | 1         | 61176455  |
| rs636162  |   | 1 |   | 1 | 1 | 1  | 11        | 133439623 |
| rs636578  | 1 | 1 |   |   | 1 | 1  | 10        | 5978550   |
| rs636918  | 1 | 1 | 1 | 1 | 1 | 1  | 9         | 264641    |
| rs637001  | 1 | 1 | 1 | 1 | 1 | 1  | 18        | 41820643  |
| rs638473  | 1 | 1 | 1 | 1 | 1 | 1  | 6         | 117306516 |
| rs639228  |   | 1 |   | 1 | 1 | 1  | 11        | 73775613  |
| rs639813  | 1 | 1 | 1 | 1 | 1 | 1  | 10        | 115998240 |
| rs639847  | 1 | 1 | 1 | 1 | 1 | 1  | 1         | 234587356 |
| rs641117  | 1 | 1 |   |   | 1 | 1  | 7         | 51792039  |
| rs6416581 | 1 | 1 | 1 | 1 | 1 | 1  | 15        | 91537878  |
| rs6424705 |   | 1 |   | 1 | 1 | 1  | 1         | 80682005  |
| rs6427830 | 1 | 1 |   |   | 1 | 1  | 1         | 198731426 |
| rs6427832 | 1 | 1 | 1 | 1 | 1 | 1  | 1         | 198732627 |
| rs6428283 |   | 1 |   | 1 | 1 | 1  | 1         | 193630035 |

|           |   |   |   |   |   |   |    |           |
|-----------|---|---|---|---|---|---|----|-----------|
| rs6429302 | 1 | 1 |   |   | 1 | 1 | 1  | 239979931 |
| rs6431565 | 1 | 1 | 1 | 1 |   | 1 | 2  | 238501422 |
| rs6432594 | 1 | 1 | 1 | 1 |   | 1 | 2  | 160673581 |
| rs6433006 | 1 | 1 |   |   | 1 | 1 | 2  | 168271898 |
| rs6436883 | 1 | 1 | 1 | 1 | 1 | 1 | 2  | 230213277 |
| rs6441075 |   | 1 |   | 1 |   | 1 | 3  | 157724000 |
| rs6448638 | 1 | 1 | 1 | 1 |   | 1 | 4  | 28944661  |
| rs6448770 | 1 | 1 | 1 | 1 | 1 | 1 | 4  | 31006008  |
| rs6449375 | 1 | 1 | 1 | 1 | 1 | 1 | 4  | 18001717  |
| rs6452431 | 1 | 1 | 1 | 1 |   | 1 | 5  | 81166273  |
| rs6452788 | 1 | 1 | 1 | 1 | 1 | 1 | 5  | 87748669  |
| rs6453278 | 1 | 1 | 1 | 1 |   | 1 | 5  | 76452798  |
| rs6454198 | 1 | 1 | 1 | 1 |   | 1 | 6  | 81794839  |
| rs6455468 | 1 | 1 | 1 | 1 |   | 1 | 6  | 168127794 |
| rs6455744 | 1 | 1 |   |   | 1 | 1 | 6  | 161980458 |
| rs6457200 | 1 | 1 | 1 | 1 |   | 1 | 6  | 11363344  |
| rs6458011 |   | 1 |   | 1 |   | 1 | 6  | 37768845  |
| rs6461222 | 1 | 1 |   |   | 1 | 1 | 7  | 16111786  |
| rs6461936 | 1 | 1 | 1 | 1 |   | 1 | 7  | 26394068  |
| rs6464631 | 1 | 1 |   |   | 1 | 1 | 7  | 144280173 |
| rs6465710 | 1 | 1 |   |   | 1 | 1 | 7  | 98186233  |
| rs6467552 | 1 | 1 | 1 | 1 |   | 1 | 7  | 134041013 |
| rs647651  |   | 1 |   | 1 |   | 1 | 18 | 11875553  |
| rs6476962 | 1 | 1 | 1 | 1 |   | 1 | 9  | 5314922   |
| rs648216  | 1 | 1 | 1 | 1 |   | 1 | 1  | 85687645  |
| rs6482235 |   | 1 |   | 1 |   | 1 | 10 | 23062972  |
| rs6488053 | 1 | 1 | 1 | 1 |   | 1 | 12 | 32447113  |
| rs6490474 | 1 | 1 |   |   | 1 | 1 | 13 | 30120720  |
| rs6492565 | 1 | 1 | 1 | 1 |   | 1 | 13 | 91428745  |
| rs6494899 |   | 1 |   | 1 |   | 1 | 15 | 69289582  |
| rs6495883 | 1 | 1 |   |   | 1 | 1 | 15 | 35073394  |
| rs6499196 |   | 1 |   | 1 |   | 1 | 16 | 50008820  |
| rs6500701 | 1 | 1 |   |   | 1 | 1 | 16 | 5580444   |
| rs6505276 | 1 | 1 | 1 | 1 |   | 1 | 17 | 22802625  |
| rs6507618 | 1 | 1 |   |   | 1 | 1 | 18 | 41286281  |
| rs6515304 |   | 1 |   | 1 |   | 1 | 20 | 23066199  |
| rs6531122 | 1 | 1 |   |   | 1 | 1 | 2  | 18890455  |
| rs6531191 | 1 | 1 | 1 | 1 |   | 1 | 2  | 19742364  |
| rs6536415 | 1 | 1 | 1 | 1 |   | 1 | 4  | 160540931 |
| rs6538448 |   | 1 |   | 1 |   | 1 | 12 | 75217841  |
| rs6538980 | 1 | 1 | 1 | 1 |   | 1 | 12 | 100217097 |
| rs6542832 | 1 | 1 | 1 | 1 |   | 1 | 2  | 109443585 |
| rs6542847 | 1 | 1 | 1 | 1 |   | 1 | 2  | 98939903  |
| rs6543865 | 1 | 1 |   |   | 1 | 1 | 2  | 34796422  |
| rs6544718 | 1 | 1 | 1 | 1 | 1 | 1 | 2  | 43958429  |
| rs6545561 | 1 | 1 | 1 | 1 |   | 1 | 2  | 56310240  |
| rs6545786 | 1 | 1 |   |   | 1 | 1 | 2  | 60256522  |
| rs654698  | 1 | 1 |   |   | 1 | 1 | 6  | 151058431 |
| rs6547479 | 1 | 1 | 1 | 1 |   | 1 | 2  | 83369435  |
| rs6547790 | 1 | 1 |   |   | 1 | 1 | 2  | 88835359  |
| rs6553978 |   | 1 |   | 1 |   | 1 | 4  | 31600519  |
| rs655937  |   | 1 |   | 1 |   | 1 | 18 | 61108446  |

|           |   |   |   |   |   |    |          |           |
|-----------|---|---|---|---|---|----|----------|-----------|
| rs6564177 | 1 | 1 | 1 | 1 | 1 | 16 | 73441571 |           |
| rs6565261 | 1 | 1 | 1 | 1 | 1 | 16 | 28811157 |           |
| rs6565965 |   | 1 |   | 1 | 1 | 18 | 73256562 |           |
| rs6567128 | 1 | 1 |   |   | 1 | 1  | 18       | 55706948  |
| rs6569343 | 1 | 1 | 1 | 1 |   | 1  | 6        | 123779378 |
| rs6573190 | 1 | 1 |   |   | 1 | 1  | 14       | 57704821  |
| rs6573249 | 1 | 1 |   |   | 1 | 1  | 14       | 58700292  |
| rs6574859 | 1 | 1 | 1 | 1 |   | 1  | 14       | 85428320  |
| rs6577605 | 1 | 1 |   |   | 1 | 1  | 3        | 17977501  |
| rs6577810 |   | 1 |   | 1 |   | 1  | 8        | 138682350 |
| rs6582999 | 1 | 1 | 1 | 1 |   | 1  | 1        | 107299188 |
| rs6583169 |   | 1 |   | 1 |   | 1  | 3        | 197893709 |
| rs6585128 | 1 | 1 | 1 | 1 |   | 1  | 10       | 113709754 |
| rs6585474 | 1 | 1 | 1 | 1 |   | 1  | 10       | 119933650 |
| rs6586395 | 1 | 1 | 1 | 1 |   | 1  | 1        | 232715442 |
| rs6586618 |   | 1 |   | 1 |   | 1  | 8        | 17564515  |
| rs6587597 | 1 | 1 | 1 | 1 | 1 | 1  | 1        | 149787355 |
| rs6587735 |   | 1 |   | 1 |   | 1  | 1        | 151532151 |
| rs6589484 | 1 | 1 |   |   | 1 | 1  | 11       | 114576024 |
| rs6593288 | 1 | 1 | 1 | 1 |   | 1  | 7        | 55911748  |
| rs6593652 | 1 | 1 | 1 | 1 |   | 1  | 1        | 95555121  |
| rs659580  | 1 | 1 |   |   | 1 | 1  | 1        | 168900520 |
| rs6598886 |   | 1 |   | 1 |   | 1  | 1        | 27721887  |
| rs6599127 | 1 | 1 | 1 | 1 |   | 1  | 3        | 40932695  |
| rs6606877 | 1 | 1 | 1 | 1 |   | 1  | 15       | 24969732  |
| rs662291  | 1 | 1 | 1 | 1 |   | 1  | 3        | 108744156 |
| rs6660484 | 1 | 1 | 1 | 1 | 1 | 1  | 1        | 91945196  |
| rs6671940 |   | 1 |   | 1 |   | 1  | 1        | 243385031 |
| rs6673923 | 1 | 1 | 1 | 1 |   | 1  | 1        | 155469275 |
| rs6680701 | 1 | 1 | 1 | 1 | 1 | 1  | 1        | 175579901 |
| rs6683194 |   | 1 |   | 1 |   | 1  | 1        | 106902291 |
| rs669336  | 1 | 1 | 1 | 1 |   | 1  | 11       | 85376515  |
| rs6695712 | 1 | 1 | 1 | 1 |   | 1  | 1        | 211898852 |
| rs6705555 | 1 | 1 | 1 | 1 |   | 1  | 2        | 71916039  |
| rs6708456 |   | 1 |   | 1 |   | 1  | 2        | 241378666 |
| rs6710812 | 1 | 1 | 1 | 1 |   | 1  | 2        | 235262738 |
| rs6712681 | 1 | 1 | 1 | 1 |   | 1  | 2        | 80377689  |
| rs6713506 | 1 | 1 | 1 | 1 | 1 | 1  | 2        | 47891835  |
| rs6713893 | 1 | 1 |   |   | 1 | 1  | 2        | 2649185   |
| rs6714237 | 1 | 1 |   |   | 1 | 1  | 2        | 237734087 |
| rs6715256 |   | 1 |   | 1 |   | 1  | 2        | 28577446  |
| rs6716268 | 1 | 1 | 1 | 1 |   | 1  | 2        | 45827640  |
| rs6720799 | 1 | 1 | 1 | 1 | 1 | 1  | 2        | 70225533  |
| rs6722139 | 1 | 1 |   |   | 1 | 1  | 2        | 20964863  |
| rs6723108 |   | 1 |   | 1 |   | 1  | 2        | 135196450 |
| rs6725236 | 1 | 1 | 1 | 1 |   | 1  | 2        | 123111992 |
| rs6726455 | 1 | 1 |   |   | 1 | 1  | 2        | 117539045 |
| rs6727258 | 1 | 1 | 1 | 1 |   | 1  | 2        | 67093532  |
| rs6727787 | 1 | 1 | 1 | 1 |   | 1  | 2        | 131373055 |
| rs6729229 | 1 | 1 | 1 | 1 |   | 1  | 2        | 181402155 |
| rs6730690 |   | 1 |   | 1 |   | 1  | 2        | 20419674  |
| rs6735786 | 1 | 1 |   |   | 1 | 1  | 2        | 103136670 |

|           |   |   |   |   |   |    |           |
|-----------|---|---|---|---|---|----|-----------|
| rs6741326 | 1 | 1 | 1 | 1 | 1 | 2  | 50982789  |
| rs6741915 |   | 1 |   | 1 | 1 | 2  | 158508815 |
| rs6742202 | 1 | 1 | 1 | 1 | 1 | 2  | 23570199  |
| rs6742567 | 1 | 1 |   |   | 1 | 2  | 220989636 |
| rs6744743 | 1 | 1 | 1 | 1 | 1 | 2  | 1537168   |
| rs6746287 | 1 | 1 | 1 | 1 | 1 | 2  | 55391601  |
| rs6746518 | 1 | 1 |   |   | 1 | 2  | 22574106  |
| rs6749268 | 1 | 1 | 1 | 1 | 1 | 2  | 118335398 |
| rs6749316 |   | 1 |   | 1 | 1 | 2  | 137789970 |
| rs6749847 | 1 | 1 | 1 | 1 | 1 | 2  | 177276102 |
| rs6749992 | 1 | 1 | 1 | 1 | 1 | 2  | 25344949  |
| rs6750788 |   | 1 |   | 1 | 1 | 2  | 135079451 |
| rs6752189 | 1 | 1 | 1 | 1 | 1 | 2  | 163857936 |
| rs6752254 | 1 | 1 | 1 | 1 | 1 | 2  | 218766988 |
| rs6752774 | 1 | 1 |   |   | 1 | 2  | 122735016 |
| rs6753018 | 1 | 1 | 1 | 1 | 1 | 2  | 217146162 |
| rs6755935 |   | 1 |   | 1 | 1 | 2  | 99762971  |
| rs6758966 |   | 1 |   | 1 | 1 | 2  | 63287683  |
| rs6761616 | 1 | 1 | 1 | 1 | 1 | 2  | 198825702 |
| rs676388  | 1 | 1 | 1 | 1 | 1 | 19 | 53903781  |
| rs6764568 |   | 1 |   | 1 | 1 | 3  | 118876601 |
| rs6765166 | 1 | 1 | 1 | 1 | 1 | 3  | 153980576 |
| rs6766822 | 1 | 1 | 1 | 1 | 1 | 3  | 24753694  |
| rs6767356 | 1 | 1 |   |   | 1 | 3  | 16329471  |
| rs6767950 | 1 | 1 | 1 | 1 | 1 | 3  | 135960798 |
| rs6771207 |   | 1 |   | 1 | 1 | 3  | 184379106 |
| rs6772196 | 1 | 1 | 1 | 1 | 1 | 3  | 152630658 |
| rs6773085 | 1 | 1 | 1 | 1 | 1 | 3  | 59447213  |
| rs6773576 | 1 | 1 |   |   | 1 | 3  | 45092177  |
| rs6773931 | 1 | 1 | 1 | 1 | 1 | 3  | 56710220  |
| rs6774262 | 1 | 1 |   |   | 1 | 3  | 32814515  |
| rs6775595 | 1 | 1 | 1 | 1 | 1 | 3  | 190616271 |
| rs677637  | 1 | 1 | 1 | 1 | 1 | 8  | 2789195   |
| rs677874  |   | 1 |   | 1 | 1 | 11 | 31847879  |
| rs6778799 | 1 | 1 | 1 | 1 | 1 | 3  | 74167515  |
| rs6779258 | 1 | 1 | 1 | 1 | 1 | 3  | 71632329  |
| rs677986  | 1 | 1 | 1 | 1 | 1 | 10 | 6517273   |
| rs6781302 |   | 1 |   | 1 | 1 | 3  | 152638310 |
| rs6782694 | 1 | 1 | 1 | 1 | 1 | 3  | 143110550 |
| rs6785141 |   | 1 |   | 1 | 1 | 3  | 45352699  |
| rs6788568 | 1 | 1 |   |   | 1 | 3  | 61958499  |
| rs6791084 | 1 | 1 |   |   | 1 | 3  | 30101617  |
| rs6793927 | 1 | 1 | 1 | 1 | 1 | 3  | 162793530 |
| rs6794386 |   | 1 |   | 1 | 1 | 3  | 177973753 |
| rs6795695 | 1 | 1 | 1 | 1 | 1 | 3  | 36497952  |
| rs6795735 | 1 | 1 | 1 | 1 | 1 | 3  | 64680405  |
| rs6796183 | 1 | 1 | 1 | 1 | 1 | 3  | 97047528  |
| rs6798710 | 1 | 1 |   |   | 1 | 3  | 31729635  |
| rs6798997 | 1 | 1 | 1 | 1 | 1 | 3  | 123557394 |
| rs6799064 | 1 | 1 | 1 | 1 | 1 | 3  | 1894850   |
| rs6799349 | 1 | 1 |   |   | 1 | 3  | 22587798  |
| rs6814930 |   | 1 |   | 1 | 1 | 4  | 133699482 |

|           |   |   |   |   |   |   |    |           |
|-----------|---|---|---|---|---|---|----|-----------|
| rs6820697 | 1 | 1 | 1 | 1 | 1 | 1 | 4  | 85019499  |
| rs6824429 | 1 | 1 | 1 | 1 |   | 1 | 4  | 97144933  |
| rs6825391 | 1 | 1 |   |   | 1 | 1 | 4  | 162226274 |
| rs6825981 |   | 1 |   | 1 |   | 1 | 4  | 79565783  |
| rs6831024 | 1 | 1 | 1 | 1 | 1 | 1 | 4  | 25472473  |
| rs6831436 | 1 | 1 | 1 | 1 |   | 1 | 4  | 182596755 |
| rs6832891 | 1 | 1 | 1 | 1 | 1 | 1 | 4  | 54751401  |
| rs6838184 | 1 | 1 | 1 | 1 |   | 1 | 4  | 80584789  |
| rs6842443 | 1 | 1 | 1 | 1 |   | 1 | 4  | 130375038 |
| rs6845865 | 1 | 1 | 1 | 1 |   | 1 | 4  | 149194052 |
| rs6848086 | 1 | 1 |   |   | 1 | 1 | 4  | 23804259  |
| rs6849949 | 1 | 1 |   |   | 1 | 1 | 4  | 182757496 |
| rs6851586 |   | 1 |   | 1 |   | 1 | 4  | 25109577  |
| rs6855114 | 1 | 1 | 1 | 1 |   | 1 | 4  | 10271488  |
| rs6855792 | 1 | 1 | 1 | 1 |   | 1 | 4  | 34415180  |
| rs6859290 | 1 | 1 | 1 | 1 |   | 1 | 5  | 27720272  |
| rs6862868 | 1 | 1 | 1 | 1 |   | 1 | 5  | 167762470 |
| rs6863510 | 1 | 1 | 1 | 1 | 1 | 1 | 5  | 124212446 |
| rs6865013 | 1 | 1 | 1 | 1 |   | 1 | 5  | 120714197 |
| rs6866231 | 1 | 1 | 1 | 1 | 1 | 1 | 5  | 128831244 |
| rs6866623 |   | 1 |   | 1 |   | 1 | 5  | 28204404  |
| rs6869645 | 1 | 1 | 1 | 1 |   | 1 | 5  | 1457548   |
| rs6874663 | 1 | 1 | 1 | 1 |   | 1 | 5  | 143449989 |
| rs687582  | 1 | 1 |   |   | 1 | 1 | 13 | 43405689  |
| rs6876965 | 1 | 1 |   |   | 1 | 1 | 5  | 29792295  |
| rs6877265 | 1 | 1 | 1 | 1 |   | 1 | 5  | 108662027 |
| rs6880337 |   | 1 |   | 1 |   | 1 | 5  | 99662997  |
| rs6881628 | 1 | 1 | 1 | 1 |   | 1 | 5  | 9592540   |
| rs6886928 | 1 | 1 |   |   | 1 | 1 | 5  | 166916703 |
| rs6898174 | 1 | 1 | 1 | 1 |   | 1 | 5  | 65935134  |
| rs689902  |   | 1 |   | 1 |   | 1 | 18 | 72248957  |
| rs6902235 |   | 1 |   | 1 |   | 1 | 6  | 147356989 |
| rs6905808 | 1 | 1 | 1 | 1 |   | 1 | 6  | 3512554   |
| rs6906147 | 1 | 1 |   |   | 1 | 1 | 6  | 77717486  |
| rs6909633 | 1 | 1 |   |   | 1 | 1 | 6  | 20581052  |
| rs6911127 | 1 | 1 | 1 | 1 |   | 1 | 17 | 74008709  |
| rs6913656 | 1 | 1 | 1 | 1 |   | 1 | 6  | 112589928 |
| rs6914928 | 1 | 1 |   |   | 1 | 1 | 6  | 95181973  |
| rs6918777 | 1 | 1 | 1 | 1 |   | 1 | 6  | 93426376  |
| rs692157  | 1 | 1 | 1 | 1 | 1 | 1 | 4  | 122602284 |
| rs6922822 | 1 | 1 | 1 | 1 |   | 1 | 6  | 13902023  |
| rs6925433 | 1 | 1 |   |   | 1 | 1 | 6  | 132161059 |
| rs6926578 | 1 | 1 | 1 | 1 |   | 1 | 6  | 142115717 |
| rs6927999 | 1 | 1 |   |   | 1 | 1 | 6  | 156913513 |
| rs6929407 | 1 | 1 |   |   | 1 | 1 | 6  | 82540364  |
| rs6932636 | 1 | 1 | 1 | 1 |   | 1 | 6  | 42324416  |
| rs6933713 | 1 | 1 |   |   | 1 | 1 | 6  | 55333017  |
| rs6937040 | 1 | 1 | 1 | 1 |   | 1 | 6  | 139335894 |
| rs6939382 |   | 1 |   | 1 |   | 1 | 6  | 152632310 |
| rs6939639 | 1 | 1 | 1 | 1 |   | 1 | 6  | 151566769 |
| rs6942609 | 1 | 1 | 1 | 1 |   | 1 | 7  | 100682200 |
| rs6947894 | 1 | 1 |   |   | 1 | 1 | 7  | 3252756   |

|           |   |   |   |   |   |   |    |           |
|-----------|---|---|---|---|---|---|----|-----------|
| rs6949245 |   | 1 |   | 1 |   | 1 | 7  | 49270837  |
| rs6949364 | 1 | 1 | 1 | 1 |   | 1 | 7  | 83241093  |
| rs6951952 | 1 | 1 |   |   | 1 | 1 | 7  | 57399776  |
| rs695288  |   | 1 |   | 1 |   | 1 | 22 | 42087635  |
| rs6954859 | 1 | 1 |   |   | 1 |   | 7  | 133212004 |
| rs6955043 |   | 1 |   | 1 |   |   | 7  | 148004289 |
| rs6957263 |   | 1 |   | 1 |   |   | 7  | 104928388 |
| rs6957465 | 1 | 1 | 1 | 1 |   |   | 7  | 40895183  |
| rs6959225 | 1 | 1 | 1 | 1 |   |   | 7  | 8499029   |
| rs6960808 |   | 1 |   | 1 |   |   | 7  | 97499079  |
| rs6962297 | 1 | 1 | 1 | 1 |   |   | 7  | 41460959  |
| rs6967514 | 1 | 1 | 1 | 1 |   |   | 7  | 47862683  |
| rs6969570 | 1 | 1 |   |   | 1 |   | 7  | 55171332  |
| rs697210  | 1 | 1 | 1 | 1 |   |   | 12 | 102617126 |
| rs697387  | 1 | 1 | 1 | 1 |   |   | 1  | 110475660 |
| rs6974261 |   | 1 |   | 1 |   |   | 7  | 52334206  |
| rs6974424 |   | 1 |   | 1 |   |   | 7  | 72704893  |
| rs697518  | 1 | 1 | 1 | 1 | 1 |   | 7  | 16725633  |
| rs6980457 | 1 | 1 | 1 | 1 |   |   | 7  | 69642601  |
| rs6981317 |   | 1 |   | 1 |   |   | 8  | 12739561  |
| rs6982890 | 1 | 1 | 1 | 1 |   |   | 8  | 32734640  |
| rs6988728 | 1 | 1 | 1 | 1 |   |   | 8  | 124778056 |
| rs6990252 |   | 1 |   | 1 |   |   | 8  | 39935625  |
| rs6990287 | 1 | 1 |   |   | 1 |   | 8  | 271572    |
| rs699039  | 1 | 1 | 1 | 1 | 1 |   | 12 | 25055598  |
| rs6990641 | 1 | 1 |   |   | 1 |   | 8  | 16749276  |
| rs6991314 | 1 | 1 | 1 | 1 |   |   | 8  | 33168920  |
| rs6992907 | 1 | 1 | 1 | 1 |   |   | 8  | 32347468  |
| rs6994325 | 1 | 1 |   |   | 1 |   | 8  | 72926615  |
| rs6997028 |   | 1 |   | 1 |   |   | 8  | 58941726  |
| rs6998140 |   | 1 |   | 1 |   |   | 8  | 135241342 |
| rs6999393 | 1 | 1 | 1 | 1 |   |   | 8  | 127251324 |
| rs700278  | 1 | 1 | 1 | 1 |   |   | 7  | 145820585 |
| rs7005520 | 1 | 1 | 1 | 1 |   |   | 8  | 119412676 |
| rs7006056 | 1 | 1 | 1 | 1 |   |   | 8  | 15159428  |
| rs7015359 | 1 | 1 | 1 | 1 |   |   | 8  | 70957101  |
| rs7015718 | 1 | 1 | 1 | 1 |   |   | 8  | 119627172 |
| rs7016335 | 1 | 1 | 1 | 1 |   |   | 8  | 145545583 |
| rs701873  | 1 | 1 | 1 | 1 | 1 |   | 10 | 95180558  |
| rs7018906 | 1 | 1 | 1 | 1 |   |   | 9  | 24585311  |
| rs7019271 | 1 | 1 | 1 | 1 |   |   | 9  | 20638805  |
| rs7028704 | 1 | 1 | 1 | 1 |   |   | 9  | 83420142  |
| rs7028995 |   | 1 |   | 1 |   |   | 9  | 132065770 |
| rs7031274 |   | 1 |   | 1 |   |   | 9  | 3002276   |
| rs7033988 | 1 | 1 |   |   | 1 |   | 9  | 22629090  |
| rs7038    | 1 | 1 | 1 | 1 |   |   | 3  | 69236544  |
| rs7038373 | 1 | 1 | 1 | 1 |   |   | 9  | 13355907  |
| rs7043322 | 1 | 1 |   |   | 1 |   | 9  | 8231845   |
| rs704410  | 1 | 1 |   |   | 1 |   | 3  | 64222367  |
| rs7045297 |   | 1 |   | 1 |   |   | 9  | 109681971 |
| rs7046471 | 1 | 1 | 1 | 1 |   |   | 9  | 127290230 |
| rs706779  |   | 1 |   | 1 |   |   | 10 | 6138830   |

|           |   |   |   |   |   |    |           |
|-----------|---|---|---|---|---|----|-----------|
| rs7071247 | 1 | 1 | 1 | 1 | 1 | 10 | 105247776 |
| rs7072160 | 1 | 1 | 1 | 1 | 1 | 10 | 73139448  |
| rs7075768 | 1 | 1 | 1 | 1 |   | 10 | 54340014  |
| rs7084722 |   | 1 |   | 1 |   | 10 | 16635402  |
| rs7087489 | 1 | 1 | 1 | 1 |   | 10 | 61615937  |
| rs7090242 | 1 | 1 | 1 | 1 | 1 | 10 | 1628527   |
| rs7091953 | 1 | 1 |   |   | 1 | 10 | 3089351   |
| rs7094179 | 1 | 1 |   |   | 1 | 10 | 14912433  |
| rs7097946 | 1 | 1 | 1 | 1 | 1 | 10 | 90635321  |
| rs7098909 |   | 1 |   | 1 |   | 10 | 82299407  |
| rs710046  |   | 1 |   | 1 |   | 14 | 61189746  |
| rs711129  | 1 | 1 | 1 | 1 |   | 12 | 76568088  |
| rs7112734 | 1 | 1 | 1 | 1 |   | 11 | 75428224  |
| rs7116354 | 1 | 1 | 1 | 1 |   | 11 | 107127988 |
| rs7118874 | 1 | 1 | 1 | 1 |   | 11 | 16443641  |
| rs712244  | 1 | 1 |   |   | 1 | 6  | 154376843 |
| rs7123425 | 1 | 1 | 1 | 1 |   | 11 | 110226397 |
| rs7125035 |   | 1 |   | 1 |   | 11 | 82475762  |
| rs712886  | 1 | 1 | 1 | 1 | 1 | 1  | 99524106  |
| rs7131355 | 1 | 1 | 1 | 1 | 1 | 11 | 115582580 |
| rs713348  | 1 | 1 | 1 | 1 |   | 4  | 19838971  |
| rs713514  | 1 | 1 | 1 | 1 |   | 2  | 23029475  |
| rs7135506 | 1 | 1 | 1 | 1 |   | 12 | 53618580  |
| rs713572  | 1 | 1 |   |   | 1 | 17 | 62421523  |
| rs7141906 | 1 | 1 |   |   | 1 | 14 | 78737063  |
| rs7143468 | 1 | 1 | 1 | 1 |   | 14 | 102307531 |
| rs7145561 |   | 1 |   | 1 |   | 14 | 75850220  |
| rs715073  | 1 | 1 | 1 | 1 |   | 12 | 114852588 |
| rs715159  | 1 | 1 | 1 | 1 | 1 | 19 | 14900519  |
| rs7151975 | 1 | 1 | 1 | 1 |   | 14 | 69623644  |
| rs7152286 | 1 | 1 | 1 | 1 | 1 | 14 | 33346235  |
| rs7152438 | 1 | 1 | 1 | 1 |   | 14 | 32191125  |
| rs7152796 | 1 | 1 | 1 | 1 |   | 14 | 88994273  |
| rs7153598 | 1 | 1 | 1 | 1 |   | 14 | 88739707  |
| rs7154324 | 1 | 1 | 1 | 1 |   | 14 | 93165928  |
| rs7163877 |   | 1 |   | 1 |   | 15 | 90654520  |
| rs716556  |   | 1 |   | 1 |   | 4  | 100903824 |
| rs716953  | 1 | 1 | 1 | 1 |   | 6  | 39457379  |
| rs7171366 | 1 | 1 | 1 | 1 |   | 15 | 43173948  |
| rs7172022 | 1 | 1 | 1 | 1 |   | 15 | 78913962  |
| rs7176207 | 1 | 1 |   |   | 1 | 15 | 52416467  |
| rs717751  | 1 | 1 | 1 | 1 |   | 10 | 108793301 |
| rs717966  | 1 | 1 | 1 | 1 |   | 2  | 22033740  |
| rs718150  |   | 1 |   | 1 |   | 12 | 37798991  |
| rs718496  |   | 1 |   | 1 |   | 21 | 46729013  |
| rs718501  | 1 | 1 |   |   | 1 | 3  | 198568120 |
| rs7186783 | 1 | 1 | 1 | 1 |   | 16 | 6525647   |
| rs7191333 |   | 1 |   | 1 |   | 16 | 67096113  |
| rs7194068 | 1 | 1 | 1 | 1 |   | 16 | 17484305  |
| rs719867  | 1 | 1 |   |   | 1 | 17 | 36182145  |
| rs719967  | 1 | 1 | 1 | 1 |   | 7  | 31550647  |
| rs720277  | 1 | 1 | 1 | 1 |   | 13 | 46431276  |

|           |   |   |   |   |   |    |           |
|-----------|---|---|---|---|---|----|-----------|
| rs7204868 | 1 | 1 | 1 | 1 |   | 16 | 48541854  |
| rs7204900 | 1 | 1 | 1 | 1 |   | 16 | 56203008  |
| rs7205649 | 1 | 1 | 1 | 1 |   | 16 | 78497005  |
| rs7205880 | 1 | 1 | 1 | 1 | 1 | 16 | 25758692  |
| rs7207559 |   | 1 |   | 1 |   | 17 | 50886802  |
| rs7215135 | 1 | 1 | 1 | 1 | 1 | 17 | 9105273   |
| rs721941  |   | 1 |   | 1 |   | 2  | 229943324 |
| rs7220080 | 1 | 1 | 1 | 1 | 1 | 17 | 22613311  |
| rs7220099 | 1 | 1 |   |   | 1 | 17 | 34038165  |
| rs7220740 | 1 | 1 |   |   | 1 | 17 | 57095575  |
| rs722113  | 1 | 1 | 1 | 1 |   | 4  | 71197092  |
| rs7221778 | 1 | 1 | 1 | 1 |   | 17 | 18728943  |
| rs7222847 | 1 | 1 | 1 | 1 |   | 17 | 8908105   |
| rs7225060 | 1 | 1 | 1 | 1 |   | 17 | 48929613  |
| rs722516  | 1 | 1 |   |   | 1 | 16 | 27303962  |
| rs7226941 |   | 1 |   | 1 |   | 18 | 43833666  |
| rs722834  |   | 1 |   | 1 |   | 20 | 24371416  |
| rs7231458 |   | 1 |   | 1 |   | 18 | 7178754   |
| rs723640  | 1 | 1 | 1 | 1 |   | 1  | 173591828 |
| rs7236593 | 1 | 1 |   | 1 | 1 | 18 | 11262254  |
| rs7240720 |   | 1 |   | 1 |   | 18 | 32142893  |
| rs7240884 |   | 1 |   | 1 |   | 18 | 55719673  |
| rs7250814 |   | 1 |   | 1 |   | 19 | 40269710  |
| rs7252868 | 1 | 1 | 1 | 1 | 1 | 19 | 45042569  |
| rs7254735 | 1 | 1 | 1 | 1 |   | 19 | 15124385  |
| rs725672  | 1 | 1 | 1 | 1 |   | 11 | 121418419 |
| rs7257017 | 1 | 1 | 1 | 1 |   | 19 | 35468876  |
| rs7257183 | 1 | 1 | 1 | 1 |   | 19 | 37155418  |
| rs7257916 | 1 | 1 | 1 | 1 |   | 19 | 50174724  |
| rs725926  | 1 | 1 | 1 | 1 |   | 10 | 97236674  |
| rs7265982 | 1 | 1 |   |   | 1 | 20 | 40842478  |
| rs7269501 | 1 | 1 | 1 | 1 |   | 20 | 7952812   |
| rs727080  | 1 | 1 |   |   | 1 | 22 | 47830859  |
| rs727637  | 1 | 1 | 1 | 1 |   | 5  | 98241891  |
| rs7277440 |   | 1 |   | 1 |   | 21 | 43653486  |
| rs7278046 | 1 | 1 | 1 | 1 |   | 21 | 27093711  |
| rs728084  |   | 1 |   | 1 |   | 12 | 83192473  |
| rs7281019 | 1 | 1 |   |   | 1 | 21 | 32880218  |
| rs728405  |   | 1 |   | 1 |   | 15 | 25873448  |
| rs729108  |   | 1 |   | 1 |   | 2  | 22630338  |
| rs7302809 |   | 1 |   | 1 |   | 12 | 116786694 |
| rs7304572 | 1 | 1 |   |   | 1 | 12 | 111009456 |
| rs7305812 | 1 | 1 | 1 | 1 |   | 12 | 105141450 |
| rs7307510 | 1 | 1 | 1 | 1 | 1 | 12 | 94761701  |
| rs7312155 | 1 | 1 | 1 | 1 | 1 | 12 | 105734583 |
| rs7313740 | 1 | 1 | 1 | 1 |   | 12 | 89811106  |
| rs7314211 | 1 | 1 |   |   | 1 | 12 | 115718907 |
| rs7315531 | 1 | 1 |   |   | 1 | 12 | 81744170  |
| rs7315904 | 1 | 1 | 1 | 1 |   | 12 | 705335    |
| rs731756  | 1 | 1 | 1 | 1 | 1 | 1  | 110662638 |
| rs7320588 |   | 1 |   | 1 |   | 13 | 104288050 |
| rs7321548 | 1 | 1 | 1 | 1 |   | 13 | 26205315  |

|           |   |   |   |   |   |    |           |
|-----------|---|---|---|---|---|----|-----------|
| rs7321658 | 1 | 1 | 1 | 1 |   | 13 | 46111173  |
| rs7323018 | 1 | 1 | 1 | 1 | 1 | 13 | 43513039  |
| rs732505  | 1 | 1 | 1 | 1 |   | 19 | 5533535   |
| rs7329258 | 1 | 1 | 1 | 1 |   | 13 | 42842759  |
| rs733044  | 1 | 1 | 1 | 1 |   | 2  | 159295821 |
| rs733046  |   | 1 |   | 1 |   | 4  | 32076883  |
| rs733224  | 1 | 1 |   |   | 1 | 11 | 69515399  |
| rs7334245 | 1 | 1 | 1 | 1 |   | 13 | 35545153  |
| rs7336525 | 1 | 1 | 1 | 1 |   | 13 | 20816844  |
| rs733920  | 1 | 1 | 1 | 1 |   | 17 | 43994702  |
| rs7341006 |   | 1 |   | 1 |   | 5  | 104737791 |
| rs7342241 | 1 | 1 | 1 | 1 | 1 | 11 | 80385259  |
| rs734888  | 1 | 1 |   |   | 1 | 16 | 82000571  |
| rs734909  | 1 | 1 | 1 | 1 |   | 7  | 87674049  |
| rs735092  | 1 | 1 |   |   | 1 | 17 | 21040337  |
| rs7359067 | 1 | 1 | 1 | 1 |   | 14 | 55464946  |
| rs736632  | 1 | 1 | 1 | 1 | 1 | 18 | 5963728   |
| rs7395210 | 1 | 1 |   |   | 1 | 11 | 32433576  |
| rs740851  | 1 | 1 | 1 | 1 | 1 | 12 | 6508611   |
| rs74111   | 1 | 1 |   |   | 1 | 6  | 15894581  |
| rs741166  | 1 | 1 |   |   | 1 | 16 | 5045441   |
| rs741718  | 1 | 1 |   |   | 1 | 16 | 21628515  |
| rs743082  | 1 | 1 | 1 | 1 |   | 20 | 1638191   |
| rs744751  | 1 | 1 | 1 | 1 | 1 | 3  | 30710941  |
| rs745080  |   | 1 |   | 1 |   | 14 | 52058978  |
| rs7460771 | 1 | 1 | 1 | 1 |   | 8  | 123546297 |
| rs7463969 | 1 | 1 |   |   | 1 | 8  | 143291920 |
| rs7487814 | 1 | 1 | 1 | 1 |   | 12 | 76658908  |
| rs7488425 |   | 1 |   | 1 |   | 12 | 72713878  |
| rs7492698 | 1 | 1 | 1 | 1 | 1 | 14 | 61809845  |
| rs7493080 |   | 1 |   | 1 |   | 14 | 68807832  |
| rs7496626 | 1 | 1 | 1 | 1 |   | 15 | 33649149  |
| rs749663  | 1 | 1 | 1 | 1 | 1 | 1  | 30081331  |
| rs7496642 | 1 | 1 |   |   | 1 | 15 | 96643784  |
| rs7501623 | 1 | 1 | 1 | 1 |   | 17 | 1724177   |
| rs7501702 | 1 | 1 |   |   | 1 | 17 | 19234320  |
| rs7502772 | 1 | 1 | 1 | 1 |   | 17 | 29723177  |
| rs7503263 | 1 | 1 | 1 | 1 |   | 17 | 26768625  |
| rs751056  |   | 1 |   | 1 |   | 3  | 2975908   |
| rs751933  | 1 | 1 |   |   | 1 | 6  | 39272099  |
| rs7521399 | 1 | 1 | 1 | 1 |   | 1  | 32194780  |
| rs7521746 | 1 | 1 | 1 | 1 |   | 1  | 189329011 |
| rs752409  | 1 | 1 | 1 | 1 |   | 13 | 47028095  |
| rs7526907 | 1 | 1 | 1 | 1 |   | 1  | 110912891 |
| rs7527904 | 1 | 1 | 1 | 1 |   | 1  | 8112441   |
| rs7529392 | 1 | 1 | 1 | 1 |   | 1  | 174870463 |
| rs753281  | 1 | 1 | 1 | 1 |   | 17 | 68691048  |
| rs753708  | 1 | 1 | 1 | 1 |   | 13 | 100219370 |
| rs7538393 | 1 | 1 | 1 | 1 |   | 1  | 197012489 |
| rs754151  | 1 | 1 |   |   | 1 | 6  | 134894887 |
| rs7544834 | 1 | 1 |   |   | 1 | 1  | 9447822   |
| rs7548659 | 1 | 1 | 1 | 1 | 1 | 1  | 11030026  |

|           |   |   |   |   |   |    |           |
|-----------|---|---|---|---|---|----|-----------|
| rs755163  |   | 1 |   | 1 |   | 18 | 59384115  |
| rs7554034 |   | 1 |   | 1 |   | 1  | 163877088 |
| rs7556067 | 1 | 1 | 1 | 1 |   | 1  | 215534891 |
| rs7556439 | 1 | 1 |   |   | 1 | 1  | 97544535  |
| rs7556765 | 1 | 1 |   |   | 1 | 2  | 41672351  |
| rs7557557 | 1 | 1 | 1 | 1 |   | 2  | 215342872 |
| rs7558428 | 1 | 1 | 1 | 1 | 1 | 2  | 181726799 |
| rs7561189 | 1 | 1 | 1 | 1 |   | 2  | 77066574  |
| rs756325  |   | 1 |   | 1 |   | 1  | 110279587 |
| rs7564244 |   | 1 |   | 1 |   | 2  | 75537419  |
| rs756473  | 1 | 1 |   |   | 1 | 14 | 67260402  |
| rs7567409 |   | 1 |   | 1 |   | 2  | 28369775  |
| rs756912  |   | 1 |   | 1 |   | 7  | 71379733  |
| rs756989  | 1 | 1 | 1 | 1 |   | 16 | 27924742  |
| rs7574579 |   | 1 |   | 1 |   | 2  | 98180486  |
| rs7574843 | 1 | 1 | 1 | 1 |   | 2  | 41646934  |
| rs7577894 | 1 | 1 | 1 | 1 | 1 | 2  | 55862408  |
| rs7580140 | 1 | 1 | 1 | 1 |   | 2  | 67819546  |
| rs7580611 | 1 | 1 | 1 | 1 |   | 2  | 209175289 |
| rs7586333 | 1 | 1 | 1 | 1 |   | 2  | 59036943  |
| rs7587228 | 1 | 1 | 1 | 1 |   | 2  | 227885723 |
| rs758755  | 1 | 1 | 1 | 1 |   | 19 | 61945186  |
| rs7591141 | 1 | 1 | 1 | 1 |   | 2  | 42206535  |
| rs7591708 |   | 1 |   | 1 |   | 2  | 62875554  |
| rs7591709 | 1 | 1 | 1 | 1 |   | 2  | 138130055 |
| rs7594034 | 1 | 1 | 1 | 1 |   | 2  | 136797619 |
| rs7594173 | 1 | 1 | 1 | 1 | 1 | 2  | 32753834  |
| rs7598286 |   | 1 |   | 1 |   | 2  | 138846539 |
| rs760560  | 1 | 1 | 1 | 1 |   | 16 | 888967    |
| rs760607  | 1 | 1 | 1 | 1 | 1 | 1  | 23735240  |
| rs761079  |   | 1 |   | 1 |   | 1  | 165881299 |
| rs7611703 | 1 | 1 |   |   | 1 | 3  | 2749996   |
| rs7615026 | 1 | 1 | 1 | 1 |   | 3  | 156635199 |
| rs7615890 | 1 | 1 | 1 | 1 |   | 3  | 140826529 |
| rs7617462 |   | 1 |   | 1 |   | 3  | 37842508  |
| rs7617478 | 1 | 1 | 1 | 1 |   | 3  | 30509846  |
| rs761875  |   | 1 |   | 1 |   | 14 | 22726721  |
| rs762006  | 1 | 1 |   |   | 1 | 21 | 19332251  |
| rs7620657 | 1 | 1 |   |   | 1 | 3  | 36775261  |
| rs7622837 |   | 1 |   | 1 |   | 3  | 154536934 |
| rs7625229 | 1 | 1 | 1 | 1 |   | 3  | 134679961 |
| rs7628494 | 1 | 1 | 1 | 1 |   | 3  | 4969471   |
| rs7630043 | 1 | 1 | 1 | 1 | 1 | 3  | 96097436  |
| rs7632151 | 1 | 1 | 1 | 1 |   | 3  | 195972785 |
| rs7634702 | 1 | 1 | 1 | 1 | 1 | 3  | 116811864 |
| rs763478  |   | 1 |   | 1 |   | 14 | 79208020  |
| rs7636818 | 1 | 1 | 1 | 1 | 1 | 3  | 180504809 |
| rs7637171 | 1 | 1 | 1 | 1 |   | 3  | 120499271 |
| rs7638534 | 1 | 1 |   |   | 1 | 3  | 1915190   |
| rs7643346 |   | 1 |   | 1 |   | 3  | 142488264 |
| rs7646247 | 1 | 1 |   |   | 1 | 3  | 198003606 |
| rs7646338 | 1 | 1 |   |   | 1 | 3  | 172481465 |

|           |   |   |   |   |   |    |           |
|-----------|---|---|---|---|---|----|-----------|
| rs7646968 | 1 | 1 | 1 | 1 |   | 3  | 78295900  |
| rs764833  | 1 | 1 |   |   | 1 | 12 | 87874101  |
| rs7648737 |   | 1 |   | 1 |   | 3  | 185283157 |
| rs7651    | 1 | 1 | 1 | 1 |   | 17 | 69769527  |
| rs7652486 | 1 | 1 | 1 | 1 |   | 3  | 153653380 |
| rs7656979 | 1 | 1 |   |   | 1 | 4  | 184754237 |
| rs7658820 | 1 | 1 | 1 | 1 |   | 4  | 162442931 |
| rs7659915 |   | 1 |   | 1 |   | 4  | 182182771 |
| rs7660552 | 1 | 1 | 1 | 1 |   | 4  | 186305631 |
| rs7660970 | 1 | 1 | 1 | 1 |   | 4  | 66459835  |
| rs7667542 | 1 | 1 |   |   | 1 | 4  | 115491050 |
| rs7669241 | 1 | 1 | 1 | 1 | 1 | 4  | 100649947 |
| rs7673403 | 1 | 1 | 1 | 1 |   | 4  | 32550339  |
| rs7678082 |   | 1 |   | 1 |   | 4  | 184444059 |
| rs7678343 | 1 | 1 |   |   | 1 | 4  | 161555665 |
| rs7681728 |   | 1 |   | 1 |   | 4  | 2650313   |
| rs7685182 | 1 | 1 | 1 | 1 |   | 4  | 40586957  |
| rs7685881 | 1 | 1 | 1 | 1 |   | 4  | 40855713  |
| rs768624  | 1 | 1 |   |   | 1 | 17 | 11423658  |
| rs7691380 | 1 | 1 | 1 | 1 |   | 4  | 75843499  |
| rs7696346 | 1 | 1 | 1 | 1 |   | 4  | 76413427  |
| rs7698580 | 1 | 1 | 1 | 1 |   | 4  | 108228616 |
| rs7699716 |   | 1 |   | 1 |   | 4  | 96648015  |
| rs7701116 | 1 | 1 | 1 | 1 |   | 5  | 138433977 |
| rs7701443 | 1 | 1 | 1 | 1 |   | 5  | 142772843 |
| rs7707491 | 1 | 1 | 1 | 1 |   | 5  | 16235201  |
| rs7707803 |   | 1 |   | 1 |   | 5  | 147368427 |
| rs7710236 |   | 1 |   | 1 |   | 5  | 28061691  |
| rs7710255 |   | 1 |   | 1 |   | 5  | 35759810  |
| rs7713279 | 1 | 1 |   |   | 1 | 5  | 33964659  |
| rs7714333 | 1 | 1 |   |   | 1 | 5  | 6370260   |
| rs7717247 | 1 | 1 | 1 | 1 |   | 5  | 27875015  |
| rs7718757 | 1 | 1 | 1 | 1 | 1 | 5  | 56965873  |
| rs7720751 | 1 | 1 | 1 | 1 |   | 5  | 67270813  |
| rs7722729 |   | 1 |   | 1 |   | 5  | 162875014 |
| rs7725438 | 1 | 1 | 1 | 1 |   | 5  | 91419604  |
| rs7727368 | 1 | 1 |   |   | 1 | 5  | 133028407 |
| rs7727897 | 1 | 1 | 1 | 1 | 1 | 5  | 176979615 |
| rs773358  | 1 | 1 |   |   | 1 | 13 | 104175464 |
| rs7744432 | 1 | 1 | 1 | 1 |   | 6  | 119914299 |
| rs7748977 | 1 | 1 | 1 | 1 |   | 6  | 43621785  |
| rs7751410 | 1 | 1 | 1 | 1 |   | 6  | 122703037 |
| rs7752220 | 1 | 1 | 1 | 1 |   | 6  | 106141710 |
| rs7753036 | 1 | 1 | 1 | 1 | 1 | 6  | 138953540 |
| rs7763768 | 1 | 1 | 1 | 1 | 1 | 6  | 17037691  |
| rs7764278 | 1 | 1 | 1 | 1 |   | 6  | 42265795  |
| rs7766847 | 1 | 1 | 1 | 1 |   | 6  | 169140392 |
| rs7768480 |   | 1 |   | 1 |   | 6  | 132245125 |
| rs7769325 | 1 | 1 | 1 | 1 |   | 6  | 83497136  |
| rs7772351 | 1 | 1 | 1 | 1 |   | 6  | 88417736  |
| rs7776642 |   | 1 |   | 1 |   | 7  | 52506324  |
| rs7777049 | 1 | 1 |   |   | 1 | 7  | 28875208  |

|           |   |   |   |   |   |    |           |
|-----------|---|---|---|---|---|----|-----------|
| rs7781715 | 1 | 1 | 1 | 1 | 1 | 7  | 110500456 |
| rs7782814 | 1 | 1 | 1 | 1 |   | 7  | 15466197  |
| rs7785534 | 1 | 1 |   |   | 1 | 7  | 31142489  |
| rs7785682 | 1 | 1 | 1 | 1 |   | 7  | 14389625  |
| rs7787246 | 1 | 1 | 1 | 1 |   | 7  | 22089032  |
| rs7788953 | 1 | 1 |   |   | 1 | 7  | 133822262 |
| rs7791143 | 1 | 1 | 1 | 1 | 1 | 7  | 89525200  |
| rs7791755 |   | 1 |   | 1 |   | 7  | 146667621 |
| rs7792872 |   | 1 |   | 1 |   | 7  | 105985048 |
| rs7795021 | 1 | 1 | 1 | 1 | 1 | 7  | 149712418 |
| rs7798936 | 1 | 1 | 1 | 1 |   | 7  | 95251189  |
| rs7799249 |   | 1 |   | 1 |   | 7  | 138105648 |
| rs7806048 | 1 | 1 | 1 | 1 | 1 | 7  | 151209684 |
| rs7807708 | 1 | 1 | 1 | 1 |   | 7  | 51514317  |
| rs7809872 | 1 | 1 | 1 | 1 |   | 7  | 155904700 |
| rs7810211 |   | 1 |   | 1 |   | 7  | 92628765  |
| rs7814958 |   | 1 |   | 1 |   | 8  | 143145442 |
| rs7815794 |   | 1 |   | 1 |   | 8  | 140206300 |
| rs7816535 | 1 | 1 |   |   | 1 | 8  | 128206850 |
| rs7818467 | 1 | 1 | 1 | 1 |   | 8  | 37319899  |
| rs7820789 | 1 | 1 | 1 | 1 |   | 8  | 21398897  |
| rs7826090 | 1 | 1 | 1 | 1 |   | 8  | 109357618 |
| rs7827918 | 1 | 1 | 1 | 1 | 1 | 8  | 60640671  |
| rs7830163 | 1 | 1 | 1 | 1 | 1 | 8  | 53240995  |
| rs7834280 | 1 | 1 | 1 | 1 |   | 8  | 72909605  |
| rs7834762 | 1 | 1 | 1 | 1 |   | 8  | 114978192 |
| rs7835234 |   | 1 |   | 1 |   | 8  | 135149317 |
| rs7836513 |   | 1 |   | 1 |   | 8  | 69776434  |
| rs783919  | 1 | 1 |   |   | 1 | 4  | 99167973  |
| rs7841751 | 1 | 1 |   |   | 1 | 8  | 76065500  |
| rs7852159 | 1 | 1 | 1 | 1 |   | 9  | 23565805  |
| rs7852779 | 1 | 1 | 1 | 1 |   | 9  | 16802767  |
| rs7856085 | 1 | 1 | 1 | 1 |   | 9  | 117552118 |
| rs7857137 |   | 1 |   | 1 |   | 9  | 71518547  |
| rs7860625 | 1 | 1 | 1 | 1 | 1 | 9  | 115104908 |
| rs7862217 | 1 | 1 |   |   | 1 | 9  | 27141645  |
| rs7862560 |   | 1 |   | 1 |   | 9  | 134019860 |
| rs7863204 | 1 | 1 |   |   | 1 | 9  | 105683238 |
| rs7863810 | 1 | 1 |   |   | 1 | 9  | 36015452  |
| rs7866311 | 1 | 1 |   |   | 1 | 9  | 131454006 |
| rs7870926 | 1 | 1 | 1 | 1 |   | 9  | 99836766  |
| rs7871109 |   | 1 |   | 1 |   | 9  | 104568537 |
| rs7871735 | 1 | 1 | 1 | 1 |   | 9  | 24195004  |
| rs7872200 | 1 | 1 | 1 | 1 |   | 9  | 5700774   |
| rs7872577 | 1 | 1 | 1 | 1 |   | 9  | 16191392  |
| rs787652  |   | 1 |   | 1 |   | 10 | 95026565  |
| rs789331  |   | 1 |   | 1 |   | 12 | 68710951  |
| rs7894368 | 1 | 1 | 1 | 1 |   | 10 | 129668421 |
| rs7895270 | 1 | 1 |   |   | 1 | 10 | 85968971  |
| rs789620  | 1 | 1 |   |   | 1 | 3  | 195734782 |
| rs7898511 | 1 | 1 |   |   | 1 | 10 | 56105995  |
| rs7904177 |   | 1 |   | 1 |   | 10 | 14658852  |

|           |   |   |   |   |   |    |           |
|-----------|---|---|---|---|---|----|-----------|
| rs7904364 | 1 | 1 | 1 | 1 |   | 10 | 133063691 |
| rs7909464 | 1 | 1 | 1 | 1 |   | 10 | 29582635  |
| rs7910476 | 1 | 1 | 1 | 1 |   | 10 | 50052484  |
| rs791656  | 1 | 1 | 1 | 1 |   | 9  | 12481250  |
| rs7921493 | 1 | 1 | 1 | 1 | 1 | 10 | 7379070   |
| rs7924850 |   | 1 |   | 1 |   | 11 | 126560326 |
| rs7929684 |   | 1 |   | 1 |   | 11 | 41574372  |
| rs793096  | 1 | 1 | 1 | 1 |   | 10 | 31425455  |
| rs7931276 | 1 | 1 | 1 | 1 | 1 | 11 | 21606387  |
| rs7936604 | 1 | 1 |   |   | 1 | 11 | 82514027  |
| rs7942719 | 1 | 1 | 1 | 1 |   | 11 | 85515017  |
| rs7944926 | 1 | 1 | 1 | 1 |   | 11 | 70843273  |
| rs7946208 | 1 | 1 | 1 | 1 |   | 11 | 68827005  |
| rs7950646 | 1 | 1 |   |   | 1 | 11 | 11376945  |
| rs7954957 | 1 | 1 | 1 | 1 |   | 12 | 56585517  |
| rs7955747 |   | 1 |   | 1 |   | 12 | 120409487 |
| rs7956285 |   | 1 |   | 1 |   | 12 | 117054690 |
| rs7957392 |   | 1 |   | 1 |   | 12 | 41538986  |
| rs7960298 | 1 | 1 | 1 | 1 |   | 12 | 82028959  |
| rs7962395 |   | 1 |   | 1 |   | 12 | 75116541  |
| rs7963499 | 1 | 1 | 1 | 1 |   | 12 | 11808664  |
| rs7971883 | 1 | 1 | 1 | 1 |   | 12 | 44906568  |
| rs7976    | 1 | 1 | 1 | 1 | 1 | 19 | 40670139  |
| rs7976721 | 1 | 1 | 1 | 1 | 1 | 12 | 7824902   |
| rs7988676 | 1 | 1 |   |   | 1 | 13 | 83816590  |
| rs7994441 | 1 | 1 |   |   | 1 | 13 | 61012972  |
| rs7995306 |   | 1 |   | 1 |   | 13 | 95209221  |
| rs7996510 | 1 | 1 | 1 | 1 |   | 13 | 45368378  |
| rs7997612 | 1 | 1 | 1 | 1 |   | 13 | 36256108  |
| rs799770  | 1 | 1 | 1 | 1 |   | 2  | 154999825 |
| rs8003492 | 1 | 1 | 1 | 1 | 1 | 14 | 80155105  |
| rs8004137 | 1 | 1 | 1 | 1 |   | 14 | 80954610  |
| rs8005672 | 1 | 1 |   |   | 1 | 14 | 100528813 |
| rs8005808 | 1 | 1 | 1 | 1 |   | 14 | 33661046  |
| rs801114  | 1 | 1 |   |   | 1 | 1  | 227064458 |
| rs8012704 | 1 | 1 | 1 | 1 |   | 14 | 83781345  |
| rs8015314 | 1 | 1 |   |   | 1 | 14 | 94508981  |
| rs8015618 | 1 | 1 | 1 | 1 |   | 14 | 77450143  |
| rs8017578 |   | 1 |   | 1 |   | 14 | 83955885  |
| rs8021112 | 1 | 1 | 1 | 1 |   | 14 | 96699773  |
| rs8022613 | 1 | 1 |   |   | 1 | 14 | 23476758  |
| rs8024685 | 1 | 1 | 1 | 1 |   | 15 | 77339419  |
| rs8024968 | 1 | 1 |   |   | 1 | 15 | 25957284  |
| rs8025092 | 1 | 1 |   |   | 1 | 15 | 23426354  |
| rs8027577 | 1 | 1 |   |   | 1 | 15 | 81610668  |
| rs8027997 | 1 | 1 | 1 | 1 |   | 15 | 64654601  |
| rs8034124 | 1 | 1 | 1 | 1 |   | 15 | 30936351  |
| rs8037001 | 1 | 1 | 1 | 1 |   | 15 | 87366490  |
| rs8040452 | 1 | 1 |   |   | 1 | 15 | 93998261  |
| rs8043261 | 1 | 1 | 1 | 1 | 1 | 15 | 99096589  |
| rs8044334 | 1 | 1 | 1 | 1 |   | 16 | 79806436  |
| rs8044711 |   | 1 |   | 1 |   | 16 | 209034    |

|           |   |   |   |   |   |    |           |
|-----------|---|---|---|---|---|----|-----------|
| rs8045560 | 1 | 1 | 1 | 1 |   | 16 | 88506995  |
| rs8047148 | 1 | 1 | 1 | 1 | 1 | 16 | 22282331  |
| rs804847  | 1 | 1 | 1 | 1 | 1 | 6  | 37655491  |
| rs8048863 | 1 | 1 | 1 | 1 |   | 16 | 75170251  |
| rs8050812 | 1 | 1 | 1 | 1 |   | 16 | 30293338  |
| rs805231  | 1 | 1 |   |   | 1 | 5  | 31682614  |
| rs8052584 | 1 | 1 | 1 | 1 |   | 16 | 81862917  |
| rs8053113 | 1 | 1 | 1 | 1 |   | 16 | 58974164  |
| rs8058014 | 1 | 1 | 1 | 1 |   | 16 | 71415045  |
| rs8060233 | 1 | 1 |   |   | 1 | 16 | 12887884  |
| rs8061082 |   | 1 |   | 1 |   | 16 | 6694529   |
| rs8064140 |   | 1 |   | 1 |   | 16 | 9576189   |
| rs8066468 | 1 | 1 | 1 | 1 |   | 17 | 50813403  |
| rs8071270 | 1 | 1 | 1 | 1 | 1 | 17 | 66907543  |
| rs8071809 | 1 | 1 | 1 | 1 |   | 17 | 3886381   |
| rs8077267 | 1 | 1 | 1 | 1 |   | 17 | 40411244  |
| rs8079714 | 1 | 1 | 1 | 1 |   | 17 | 66509871  |
| rs8085403 | 1 | 1 | 1 | 1 |   | 18 | 20220413  |
| rs808868  | 1 | 1 | 1 | 1 |   | 12 | 61566017  |
| rs8090046 | 1 | 1 |   |   | 1 | 18 | 59773066  |
| rs8094458 | 1 | 1 | 1 | 1 |   | 18 | 44527491  |
| rs8095632 | 1 | 1 |   |   | 1 | 18 | 44464575  |
| rs8096418 | 1 | 1 | 1 | 1 |   | 18 | 55657375  |
| rs8097868 | 1 | 1 | 1 | 1 |   | 18 | 45732228  |
| rs8098267 | 1 | 1 |   |   | 1 | 18 | 4922842   |
| rs8099036 | 1 | 1 |   |   | 1 | 18 | 9746056   |
| rs8101605 | 1 | 1 |   |   | 1 | 19 | 59840299  |
| rs8103620 | 1 | 1 | 1 | 1 | 1 | 19 | 58389749  |
| rs8107904 | 1 | 1 | 1 | 1 |   | 19 | 14759248  |
| rs8109759 | 1 | 1 | 1 | 1 |   | 19 | 51641502  |
| rs8112788 |   | 1 |   | 1 |   | 19 | 35390533  |
| rs8115350 | 1 | 1 | 1 | 1 |   | 20 | 48330611  |
| rs8116153 | 1 | 1 | 1 | 1 | 1 | 20 | 13182124  |
| rs8121827 |   | 1 |   | 1 |   | 20 | 19892441  |
| rs813164  | 1 | 1 |   |   | 1 | 12 | 91111888  |
| rs8132470 | 1 | 1 |   |   | 1 | 21 | 37293197  |
| rs8137243 |   | 1 |   | 1 |   | 22 | 44822499  |
| rs8139619 | 1 | 1 | 1 | 1 |   | 22 | 20397722  |
| rs814958  |   | 1 |   | 1 |   | 1  | 188780806 |
| rs816960  |   | 1 |   | 1 |   | 13 | 107320522 |
| rs822396  | 1 | 1 | 1 | 1 |   | 3  | 188049571 |
| rs824453  | 1 | 1 | 1 | 1 |   | 2  | 19555773  |
| rs827628  | 1 | 1 | 1 | 1 |   | 10 | 9060240   |
| rs830605  | 1 | 1 |   |   | 1 | 3  | 71691966  |
| rs830841  | 1 | 1 | 1 | 1 |   | 4  | 187154263 |
| rs833010  | 1 | 1 | 1 | 1 |   | 7  | 136505450 |
| rs833621  | 1 | 1 | 1 | 1 |   | 6  | 44008421  |
| rs833836  | 1 | 1 | 1 | 1 |   | 12 | 47737726  |
| rs834834  |   | 1 |   | 1 |   | 2  | 156891881 |
| rs837231  |   | 1 |   | 1 |   | 8  | 131057070 |
| rs845245  |   | 1 |   | 1 |   | 1  | 7328597   |
| rs845561  | 1 | 1 | 1 | 1 |   | 7  | 55220202  |

|          |   |   |   |   |   |    |           |
|----------|---|---|---|---|---|----|-----------|
| rs845787 | 1 | 1 | 1 | 1 |   | 20 | 26145931  |
| rs846264 | 1 | 1 | 1 | 1 |   | 7  | 42057053  |
| rs847330 | 1 | 1 |   |   | 1 | 14 | 71899350  |
| rs848728 | 1 | 1 | 1 | 1 | 1 | 22 | 48126750  |
| rs849734 | 1 | 1 | 1 | 1 |   | 7  | 12758012  |
| rs855395 | 1 | 1 | 1 | 1 |   | 6  | 10157123  |
| rs859624 | 1 | 1 | 1 | 1 |   | 1  | 170997452 |
| rs861079 | 1 | 1 | 1 | 1 |   | 2  | 206297366 |
| rs865151 | 1 | 1 | 1 | 1 |   | 1  | 109297398 |
| rs867469 | 1 | 1 | 1 | 1 | 1 | 9  | 32373708  |
| rs870347 | 1 | 1 | 1 | 1 |   | 5  | 6898035   |
| rs870827 | 1 | 1 |   |   | 1 | 14 | 98674338  |
| rs8718   | 1 | 1 | 1 | 1 |   | 8  | 58033401  |
| rs872013 |   | 1 |   | 1 |   | 3  | 185109783 |
| rs873649 | 1 | 1 | 1 | 1 |   | 6  | 101544070 |
| rs874936 |   | 1 |   | 1 |   | 4  | 34650359  |
| rs875569 | 1 | 1 | 1 | 1 |   | 19 | 10529953  |
| rs875870 | 1 | 1 |   |   | 1 | 3  | 142350628 |
| rs876356 | 1 | 1 | 1 | 1 |   | 8  | 607885    |
| rs876712 | 1 | 1 |   |   | 1 | 5  | 8100543   |
| rs876977 |   | 1 |   | 1 |   | 9  | 1426134   |
| rs878485 | 1 | 1 | 1 | 1 |   | 1  | 101529614 |
| rs878983 |   | 1 |   | 1 |   | 2  | 20141229  |
| rs880385 | 1 | 1 |   |   | 1 | 1  | 55592687  |
| rs882300 |   | 1 |   | 1 |   | 2  | 136692725 |
| rs883814 | 1 | 1 | 1 | 1 |   | 10 | 14809917  |
| rs884833 | 1 | 1 | 1 | 1 |   | 9  | 7279636   |
| rs884886 | 1 | 1 | 1 | 1 | 1 | 9  | 100357896 |
| rs885334 | 1 | 1 | 1 | 1 |   | 1  | 205029039 |
| rs886471 | 1 | 1 | 1 | 1 |   | 22 | 29696675  |
| rs887106 | 1 | 1 | 1 | 1 |   | 7  | 153270507 |
| rs888438 | 1 | 1 |   |   | 1 | 1  | 235479915 |
| rs889929 |   | 1 |   | 1 |   | 7  | 134595084 |
| rs890534 | 1 | 1 | 1 | 1 |   | 8  | 14186652  |
| rs891970 | 1 | 1 |   |   | 1 | 5  | 145700624 |
| rs893220 | 1 | 1 |   |   | 1 | 15 | 78350770  |
| rs893225 |   | 1 |   | 1 |   | 8  | 97047924  |
| rs894392 | 1 | 1 | 1 | 1 |   | 2  | 106156092 |
| rs895437 |   | 1 |   | 1 |   | 2  | 97716778  |
| rs895767 | 1 | 1 |   |   | 1 | 2  | 223731540 |
| rs896401 | 1 | 1 | 1 | 1 | 1 | 16 | 8394656   |
| rs896733 | 1 | 1 | 1 | 1 |   | 2  | 20682797  |
| rs897646 | 1 | 1 | 1 | 1 |   | 12 | 130690613 |
| rs898249 | 1 | 1 | 1 | 1 |   | 8  | 21217940  |
| rs898763 | 1 | 1 | 1 | 1 |   | 3  | 81596098  |
| rs899069 | 1 | 1 | 1 | 1 |   | 12 | 27594746  |
| rs8994   | 1 | 1 | 1 | 1 |   | 20 | 19651335  |
| rs901363 |   | 1 |   | 1 |   | 6  | 159098333 |
| rs901833 | 1 | 1 | 1 | 1 |   | 4  | 26825849  |
| rs902522 | 1 | 1 |   |   | 1 | 5  | 7500405   |
| rs903422 | 1 | 1 |   |   | 1 | 3  | 30863413  |
| rs904647 |   | 1 |   | 1 |   | 12 | 123365340 |

|           |   |   |   |   |   |    |           |
|-----------|---|---|---|---|---|----|-----------|
| rs905570  | 1 | 1 | 1 | 1 |   | 3  | 115452113 |
| rs906629  | 1 | 1 |   |   | 1 | 5  | 20542872  |
| rs906671  | 1 | 1 | 1 | 1 |   | 3  | 12835988  |
| rs906811  | 1 | 1 |   |   | 1 | 15 | 54016839  |
| rs906827  |   | 1 |   | 1 |   | 11 | 119019339 |
| rs907238  | 1 | 1 | 1 | 1 |   | 4  | 152842735 |
| rs907451  | 1 | 1 |   |   | 1 | 10 | 23763006  |
| rs907704  |   | 1 |   | 1 |   | 17 | 21844527  |
| rs907942  | 1 | 1 | 1 | 1 |   | 17 | 6340611   |
| rs908791  |   | 1 |   | 1 |   | 2  | 86466162  |
| rs908822  | 1 | 1 | 1 | 1 |   | 4  | 125125707 |
| rs911028  | 1 | 1 |   |   | 1 | 6  | 165990414 |
| rs912572  | 1 | 1 | 1 | 1 | 1 | 1  | 156328250 |
| rs913259  | 1 | 1 | 1 | 1 |   | 9  | 4866997   |
| rs913834  | 1 | 1 | 1 | 1 |   | 20 | 50939815  |
| rs913984  | 1 | 1 | 1 | 1 |   | 9  | 129672963 |
| rs914405  | 1 | 1 |   |   | 1 | 9  | 137311515 |
| rs914832  | 1 | 1 |   |   | 1 | 1  | 56664002  |
| rs916654  |   | 1 |   | 1 |   | 7  | 87988734  |
| rs916809  | 1 | 1 |   |   | 1 | 12 | 46101118  |
| rs917121  | 1 | 1 | 1 | 1 |   | 7  | 148565632 |
| rs919933  |   | 1 |   | 1 |   | 2  | 34469810  |
| rs921656  | 1 | 1 | 1 | 1 |   | 2  | 108253437 |
| rs921742  | 1 | 1 | 1 | 1 |   | 10 | 16891414  |
| rs922521  | 1 | 1 |   |   | 1 | 4  | 8258710   |
| rs923921  | 1 | 1 | 1 | 1 |   | 9  | 14770698  |
| rs924247  | 1 | 1 | 1 | 1 |   | 3  | 160963022 |
| rs924795  | 1 | 1 | 1 | 1 |   | 11 | 11084593  |
| rs924884  | 1 | 1 | 1 | 1 |   | 5  | 6593005   |
| rs925748  | 1 | 1 | 1 | 1 |   | 2  | 11165264  |
| rs926521  | 1 | 1 |   |   | 1 | 1  | 165859156 |
| rs928302  | 1 | 1 | 1 | 1 |   | 21 | 42683153  |
| rs9283119 | 1 | 1 | 1 | 1 |   | 6  | 149228035 |
| rs9283696 | 1 | 1 |   |   | 1 | 4  | 11984498  |
| rs9287657 | 1 | 1 | 1 | 1 |   | 2  | 5186122   |
| rs9287671 | 1 | 1 |   |   | 1 | 2  | 5084558   |
| rs9288172 | 1 | 1 | 1 | 1 | 1 | 2  | 190958523 |
| rs9289539 | 1 | 1 | 1 | 1 |   | 3  | 138691415 |
| rs9289584 | 1 | 1 | 1 | 1 | 1 | 3  | 99583791  |
| rs9290227 | 1 | 1 | 1 | 1 |   | 3  | 95691745  |
| rs9294266 |   | 1 |   | 1 |   | 6  | 83666784  |
| rs9294876 | 1 | 1 |   |   | 1 | 6  | 71308142  |
| rs9297395 | 1 | 1 | 1 | 1 |   | 8  | 108584549 |
| rs9299261 | 1 | 1 | 1 | 1 |   | 9  | 121262728 |
| rs9300717 | 1 | 1 | 1 | 1 |   | 13 | 101634002 |
| rs9300943 | 1 | 1 | 1 | 1 |   | 13 | 103985970 |
| rs9300960 |   | 1 |   | 1 |   | 13 | 104144500 |
| rs9302081 | 1 | 1 | 1 | 1 |   | 13 | 95006088  |
| rs9303339 | 1 | 1 |   |   | 1 | 17 | 49048233  |
| rs9305763 | 1 | 1 | 1 | 1 |   | 21 | 16681357  |
| rs9308783 | 1 | 1 | 1 | 1 |   | 2  | 4574936   |
| rs9309619 | 1 | 1 | 1 | 1 |   | 2  | 84982857  |

|           |   |   |   |   |   |    |           |
|-----------|---|---|---|---|---|----|-----------|
| rs9310279 | 1 | 1 | 1 | 1 | 1 | 3  | 73793635  |
| rs9310281 | 1 | 1 |   |   | 1 | 3  | 73964504  |
| rs9310545 |   | 1 |   | 1 |   | 3  | 18172012  |
| rs9312336 | 1 | 1 | 1 | 1 |   | 4  | 186768687 |
| rs9315112 | 1 | 1 | 1 | 1 |   | 13 | 30594502  |
| rs9315681 | 1 | 1 | 1 | 1 |   | 13 | 38881671  |
| rs9316015 | 1 | 1 |   |   | 1 | 13 | 42821803  |
| rs9320642 | 1 | 1 | 1 | 1 |   | 6  | 118546248 |
| rs9320884 |   | 1 |   | 1 |   | 6  | 122979311 |
| rs9325448 |   | 1 |   | 1 |   | 10 | 92110521  |
| rs932956  |   | 1 |   | 1 |   | 9  | 88470687  |
| rs9330294 | 1 | 1 | 1 | 1 |   | 1  | 159578631 |
| rs9332459 | 1 | 1 | 1 | 1 |   | 9  | 115780313 |
| rs933360  | 1 | 1 | 1 | 1 | 1 | 7  | 50725739  |
| rs9348260 | 1 | 1 |   |   | 1 | 6  | 170358048 |
| rs9348266 | 1 | 1 | 1 | 1 |   | 6  | 170469934 |
| rs9350143 | 1 | 1 |   |   | 1 | 6  | 19549503  |
| rs9353982 | 1 | 1 | 1 | 1 |   | 6  | 93858759  |
| rs9360459 | 1 | 1 | 1 | 1 |   | 6  | 72309728  |
| rs936110  | 1 | 1 | 1 | 1 |   | 18 | 63227575  |
| rs9366874 | 1 | 1 |   |   | 1 | 6  | 11817083  |
| rs9366950 | 1 | 1 | 1 | 1 |   | 6  | 38324672  |
| rs937238  |   | 1 |   | 1 |   | 4  | 139821295 |
| rs9376074 |   | 1 |   | 1 |   | 6  | 135333811 |
| rs9376127 | 1 | 1 | 1 | 1 |   | 6  | 99947640  |
| rs937816  | 1 | 1 | 1 | 1 |   | 18 | 54607418  |
| rs9378429 |   | 1 |   | 1 |   | 6  | 5507545   |
| rs9378806 | 1 | 1 |   |   | 1 | 6  | 3584204   |
| rs9380892 |   | 1 |   | 1 |   | 6  | 39835571  |
| rs9381462 | 1 | 1 |   |   | 1 | 6  | 12981761  |
| rs9384825 | 1 | 1 |   |   | 1 | 6  | 112774886 |
| rs9385824 | 1 | 1 | 1 | 1 |   | 6  | 138520935 |
| rs9388825 | 1 | 1 |   |   | 1 | 6  | 131033848 |
| rs938900  |   | 1 |   | 1 |   | 16 | 12683782  |
| rs9390650 |   | 1 |   | 1 |   | 6  | 149363751 |
| rs939335  |   | 1 |   | 1 |   | 3  | 185228357 |
| rs9397722 | 1 | 1 | 1 | 1 |   | 6  | 150543740 |
| rs9397861 | 1 | 1 | 1 | 1 |   | 6  | 156279496 |
| rs9399724 | 1 | 1 | 1 | 1 |   | 6  | 95998631  |
| rs939983  | 1 | 1 |   |   | 1 | 15 | 28077722  |
| rs9400660 | 1 | 1 | 1 | 1 |   | 6  | 114130809 |
| rs9407554 | 1 | 1 | 1 | 1 |   | 9  | 13841999  |
| rs941009  |   | 1 |   | 1 |   | 2  | 6058737   |
| rs9419387 | 1 | 1 | 1 | 1 |   | 10 | 133608348 |
| rs9423942 | 1 | 1 | 1 | 1 |   | 10 | 6689138   |
| rs943068  | 1 | 1 | 1 | 1 |   | 6  | 23527622  |
| rs943763  |   | 1 |   | 1 |   | 1  | 176102887 |
| rs9442235 | 1 | 1 | 1 | 1 |   | 1  | 16265944  |
| rs944899  | 1 | 1 |   |   | 1 | 13 | 111798962 |
| rs9450576 | 1 | 1 | 1 | 1 |   | 6  | 87672689  |
| rs945146  |   | 1 |   | 1 |   | 10 | 86454567  |
| rs945249  | 1 | 1 | 1 | 1 |   | 9  | 121882081 |

|           |   |   |   |   |   |    |           |
|-----------|---|---|---|---|---|----|-----------|
| rs9454096 | 1 | 1 | 1 | 1 |   | 6  | 67959331  |
| rs945704  | 1 | 1 | 1 | 1 |   | 19 | 5655353   |
| rs9459128 | 1 | 1 | 1 | 1 |   | 6  | 164858531 |
| rs9459275 | 1 | 1 |   |   | 1 | 6  | 165321144 |
| rs9465438 | 1 | 1 | 1 | 1 |   | 6  | 19666883  |
| rs946574  | 1 | 1 | 1 | 1 |   | 1  | 59665243  |
| rs9465867 |   | 1 |   | 1 |   | 6  | 10406081  |
| rs9472294 | 1 | 1 | 1 | 1 |   | 6  | 44602448  |
| rs9486902 | 1 | 1 |   |   | 1 | 6  | 108984745 |
| rs949429  | 1 | 1 | 1 | 1 | 1 | 16 | 11283530  |
| rs9494850 |   | 1 |   | 1 |   | 6  | 138088358 |
| rs9498701 | 1 | 1 | 1 | 1 |   | 6  | 102336911 |
| rs9499550 | 1 | 1 | 1 | 1 |   | 6  | 104097165 |
| rs9502971 | 1 | 1 | 1 | 1 |   | 6  | 1516159   |
| rs9510565 | 1 | 1 | 1 | 1 |   | 13 | 22560702  |
| rs9510661 | 1 | 1 | 1 | 1 |   | 13 | 22749799  |
| rs9514044 | 1 | 1 | 1 | 1 |   | 13 | 102143466 |
| rs951920  | 1 | 1 |   |   | 1 | 8  | 140079282 |
| rs952579  | 1 | 1 | 1 | 1 |   | 6  | 21992419  |
| rs9525923 | 1 | 1 | 1 | 1 |   | 13 | 43681715  |
| rs953446  | 1 | 1 |   |   | 1 | 5  | 91374861  |
| rs9535207 | 1 | 1 | 1 | 1 |   | 13 | 48830148  |
| rs9535699 | 1 | 1 |   |   | 1 | 13 | 50975994  |
| rs9537662 | 1 | 1 | 1 | 1 |   | 13 | 56734345  |
| rs9537784 |   | 1 |   | 1 |   | 13 | 57189622  |
| rs9538032 | 1 | 1 | 1 | 1 |   | 13 | 57883848  |
| rs9539642 | 1 | 1 | 1 | 1 | 1 | 13 | 62489052  |
| rs9546361 | 1 | 1 | 1 | 1 |   | 13 | 82849103  |
| rs95510   | 1 | 1 |   |   | 1 | 16 | 64385607  |
| rs9551221 | 1 | 1 | 1 | 1 |   | 13 | 25234480  |
| rs9556820 | 1 | 1 | 1 | 1 |   | 13 | 97230391  |
| rs9559437 | 1 | 1 |   |   | 1 | 13 | 108338144 |
| rs9562077 | 1 | 1 | 1 | 1 |   | 13 | 113936115 |
| rs957387  | 1 | 1 | 1 | 1 |   | 6  | 15429838  |
| rs9575619 | 1 | 1 | 1 | 1 |   | 13 | 84101690  |
| rs957655  | 1 | 1 |   |   | 1 | 8  | 67572395  |
| rs957881  | 1 | 1 | 1 | 1 |   | 16 | 46751524  |
| rs9590145 | 1 | 1 |   |   | 1 | 13 | 94411156  |
| rs959369  | 1 | 1 | 1 | 1 |   | 6  | 74620278  |
| rs9599332 |   | 1 |   | 1 |   | 13 | 68236114  |
| rs960784  | 1 | 1 |   |   | 1 | 11 | 106286287 |
| rs9612028 | 1 | 1 |   |   | 1 | 22 | 41953966  |
| rs961316  |   | 1 |   | 1 |   | 2  | 31373527  |
| rs9613630 | 1 | 1 | 1 | 1 |   | 22 | 27201570  |
| rs961945  |   | 1 |   | 1 |   | 10 | 9166649   |
| rs9623117 | 1 | 1 | 1 | 1 |   | 22 | 38782065  |
| rs9640302 | 1 | 1 | 1 | 1 |   | 7  | 151192506 |
| rs9641023 |   | 1 |   | 1 |   | 7  | 87597026  |
| rs9641312 | 1 | 1 | 1 | 1 |   | 7  | 102979923 |
| rs9641678 | 1 | 1 |   |   | 1 | 7  | 121325240 |
| rs9642880 |   | 1 |   | 1 |   | 8  | 128787250 |
| rs9644299 | 1 | 1 |   |   | 1 | 8  | 6032068   |

|           |   |   |   |   |   |    |           |
|-----------|---|---|---|---|---|----|-----------|
| rs9644331 |   | 1 |   | 1 |   | 8  | 2490274   |
| rs9646474 | 1 | 1 | 1 | 1 |   | 18 | 13402155  |
| rs964841  | 1 | 1 | 1 | 1 |   | 12 | 60572303  |
| rs9651480 | 1 | 1 | 1 | 1 |   | 10 | 123559477 |
| rs9653448 | 1 | 1 | 1 | 1 |   | 2  | 104979771 |
| rs9654386 |   | 1 |   | 1 |   | 5  | 24323547  |
| rs9655034 | 1 | 1 |   |   | 1 | 7  | 39258636  |
| rs966857  |   | 1 |   | 1 |   | 5  | 33735433  |
| rs9671457 | 1 | 1 | 1 | 1 | 1 | 14 | 94086589  |
| rs9671535 | 1 | 1 | 1 | 1 |   | 14 | 34186040  |
| rs9676419 | 1 | 1 |   |   | 1 | 19 | 17228435  |
| rs968147  | 1 | 1 |   |   | 1 | 6  | 51182626  |
| rs9692165 | 1 | 1 | 1 | 1 |   | 7  | 81681327  |
| rs969517  | 1 | 1 | 1 | 1 |   | 2  | 205767256 |
| rs972124  | 1 | 1 | 1 | 1 |   | 7  | 9860269   |
| rs972485  |   | 1 |   | 1 |   | 2  | 142281762 |
| rs9725346 | 1 | 1 |   |   | 1 | 1  | 230343936 |
| rs972583  | 1 | 1 | 1 | 1 |   | 4  | 105661751 |
| rs9726404 | 1 | 1 | 1 | 1 |   | 1  | 9418158   |
| rs973406  | 1 | 1 |   |   | 1 | 2  | 176817977 |
| rs976990  |   | 1 |   | 1 |   | 17 | 74776367  |
| rs977655  | 1 | 1 |   |   | 1 | 13 | 25202569  |
| rs977712  | 1 | 1 | 1 | 1 | 1 | 21 | 18992561  |
| rs977955  |   | 1 |   | 1 |   | 4  | 94185503  |
| rs978752  |   | 1 |   | 1 |   | 4  | 143265049 |
| rs978763  | 1 | 1 |   |   | 1 | 1  | 158940403 |
| rs9788522 | 1 | 1 | 1 | 1 |   | 14 | 62752331  |
| rs9790518 | 1 | 1 |   |   | 1 | 4  | 146965285 |
| rs9798267 |   | 1 |   | 1 |   | 2  | 135846261 |
| rs980274  | 1 | 1 | 1 | 1 |   | 21 | 41134108  |
| rs9805111 |   | 1 |   | 1 |   | 12 | 23597542  |
| rs9809737 | 1 | 1 |   |   | 1 | 3  | 88624272  |
| rs9811329 | 1 | 1 | 1 | 1 |   | 3  | 156856177 |
| rs9813516 | 1 | 1 | 1 | 1 |   | 3  | 60268044  |
| rs981602  | 1 | 1 | 1 | 1 |   | 2  | 98830707  |
| rs9820762 | 1 | 1 | 1 | 1 |   | 3  | 195658611 |
| rs9822731 | 1 | 1 |   |   | 1 | 3  | 85488191  |
| rs9825772 | 1 | 1 | 1 | 1 |   | 3  | 127470614 |
| rs983479  | 1 | 1 |   |   | 1 | 6  | 76885497  |
| rs9839394 | 1 | 1 | 1 | 1 | 1 | 3  | 144434528 |
| rs984081  | 1 | 1 | 1 | 1 |   | 1  | 194168299 |
| rs9842160 | 1 | 1 |   |   | 1 | 3  | 39819707  |
| rs9842527 | 1 | 1 |   |   | 1 | 3  | 42234654  |
| rs9844612 |   | 1 |   | 1 |   | 3  | 174771975 |
| rs9844777 |   | 1 |   | 1 |   | 3  | 185049636 |
| rs9844890 | 1 | 1 | 1 | 1 |   | 3  | 162383399 |
| rs984682  |   | 1 |   | 1 |   | 2  | 63199425  |
| rs985246  | 1 | 1 | 1 | 1 |   | 7  | 19115372  |
| rs9852803 |   | 1 |   | 1 |   | 3  | 173233393 |
| rs9855729 | 1 | 1 | 1 | 1 |   | 3  | 198628979 |
| rs9855978 | 1 | 1 |   |   | 1 | 3  | 80171732  |
| rs9857666 | 1 | 1 |   |   | 1 | 3  | 72316453  |

|           |   |   |   |   |   |    |           |
|-----------|---|---|---|---|---|----|-----------|
| rs9859419 | 1 | 1 | 1 | 1 |   | 3  | 65679524  |
| rs9873664 | 1 | 1 | 1 | 1 |   | 3  | 25994466  |
| rs987456  | 1 | 1 | 1 | 1 |   | 7  | 147743920 |
| rs9877183 | 1 | 1 |   |   | 1 | 3  | 169414149 |
| rs9882443 | 1 | 1 | 1 | 1 |   | 3  | 48724068  |
| rs9883291 |   | 1 |   | 1 |   | 3  | 4840354   |
| rs988366  | 1 | 1 |   |   | 1 | 4  | 28991828  |
| rs988409  | 1 | 1 | 1 | 1 |   | 5  | 123758382 |
| rs9884706 | 1 | 1 | 1 | 1 | 1 | 4  | 32275985  |
| rs9905820 | 1 | 1 | 1 | 1 |   | 17 | 12578096  |
| rs9912143 | 1 | 1 | 1 | 1 |   | 17 | 8647754   |
| rs9914703 | 1 | 1 |   |   | 1 | 17 | 61772598  |
| rs991811  |   | 1 |   | 1 |   | 4  | 100729882 |
| rs9919329 |   | 1 |   | 1 |   | 1  | 67818862  |
| rs9923061 | 1 | 1 | 1 | 1 |   | 16 | 74881862  |
| rs992499  | 1 | 1 | 1 | 1 |   | 21 | 27463501  |
| rs992851  |   | 1 |   | 1 |   | 12 | 38657759  |
| rs9930132 |   | 1 |   | 1 |   | 16 | 77662123  |
| rs9937047 | 1 | 1 | 1 | 1 | 1 | 16 | 56703086  |
| rs9938659 | 1 | 1 | 1 | 1 |   | 16 | 51002320  |
| rs9939450 | 1 | 1 | 1 | 1 |   | 16 | 28208988  |
| rs9943167 | 1 | 1 | 1 | 1 |   | 1  | 42323839  |
| rs9945487 |   | 1 |   | 1 |   | 18 | 72472144  |
| rs9947280 | 1 | 1 | 1 | 1 |   | 18 | 13997837  |
| rs9948021 | 1 | 1 |   |   | 1 | 18 | 6549984   |
| rs9948912 | 1 | 1 |   |   | 1 | 18 | 33107639  |
| rs9950834 | 1 | 1 | 1 | 1 |   | 18 | 42548720  |
| rs99521   | 1 | 1 | 1 | 1 |   | 15 | 91029637  |
| rs9954050 | 1 | 1 | 1 | 1 |   | 18 | 47988772  |
| rs9954356 | 1 | 1 | 1 | 1 |   | 18 | 8807441   |
| rs9958947 |   | 1 |   | 1 |   | 18 | 45340930  |
| rs996062  | 1 | 1 | 1 | 1 |   | 7  | 124154815 |
| rs997820  | 1 | 1 |   |   | 1 | 12 | 21518824  |
| rs9978445 | 1 | 1 | 1 | 1 |   | 21 | 24278435  |
| rs9981318 | 1 | 1 | 1 | 1 |   | 21 | 37071260  |
| rs9988572 | 1 | 1 |   |   | 1 | 1  | 245685933 |
| rs9993162 | 1 | 1 |   |   | 1 | 4  | 136287660 |

A. European substructure ancestry informative markers were selected as indicated in **Methods**.

B. EUROset1 contains the NORTHset1, SOUTH and NS European substructure AIMs (ESAIMs). The EUROset2 contains NORTHset2, SOUTH and NS ESAIMs.

C. NORTHset2 contains the NORTHset1 marker set and additional selected SNPs as described in **Methods**.



|       |        |        |        |        |        |        |        |        |        |        |        |        |        |        |        |        |  |
|-------|--------|--------|--------|--------|--------|--------|--------|--------|--------|--------|--------|--------|--------|--------|--------|--------|--|
| GERM  | 0.0121 | 0.0147 | 0.0136 | 0.0072 | 0.0039 | 0.0029 | 0.0089 | 0.0015 | 0.0079 | 0.0010 |        |        |        |        |        |        |  |
|       | +/-    | +/-    | +/-    | +/-    | +/-    | +/-    | +/-    | +/-    | +/-    | +/-    |        |        |        |        |        |        |  |
|       | 0.0003 | 0.0011 | 0.0007 | 0.0008 | 0.0007 | 0.0007 | 0.0004 | 0.0003 | 0.0009 | 0.0006 |        |        |        |        |        |        |  |
| EEURA | 0.0128 | 0.0149 | 0.0133 | 0.0068 | 0.0049 | 0.0040 | 0.0086 | 0.0033 | 0.0091 | 0.0034 | 0.0014 |        |        |        |        |        |  |
|       | +/-    | +/-    | +/-    | +/-    | +/-    | +/-    | +/-    | +/-    | +/-    | +/-    | +/-    |        |        |        |        |        |  |
|       | 0.002  | 0.0016 | 0.0004 | 0.0015 | 0.0022 | 0.001  | 0.0016 | 0.0018 | 0.0017 | 0.001  | 0.0015 |        |        |        |        |        |  |
| RUS   | 0.0194 | 0.0211 | 0.0202 | 0.0137 | 0.0108 | 0.0088 | 0.0120 | 0.0079 | 0.0126 | 0.0038 | 0.0037 | 0.0029 |        |        |        |        |  |
|       | +/-    | +/-    | +/-    | +/-    | +/-    | +/-    | +/-    | +/-    | +/-    | +/-    | +/-    | +/-    |        |        |        |        |  |
|       | 0.0021 | 0.0007 | 0.0011 | 0.0003 | 0.0025 | 0.0003 | 0.0007 | 0.0011 | 0.0012 | 0.0014 | 0.0006 | 0.0011 |        |        |        |        |  |
| SWED  | 0.0167 | 0.0204 | 0.0191 | 0.0120 | 0.0084 | 0.0064 | 0.0117 | 0.0055 | 0.0100 | 0.0020 | 0.0007 | 0.0025 | 0.0036 |        |        |        |  |
|       | +/-    | +/-    | +/-    | +/-    | +/-    | +/-    | +/-    | +/-    | +/-    | +/-    | +/-    | +/-    | +/-    |        |        |        |  |
|       | 0.0013 | 0.0006 | 0.0005 | 0.0003 | 0.0009 | 0.001  | 0.0009 | 0.0008 | 0.0014 | 0.0004 | 0.0002 | 0.0009 | 0.0008 |        |        |        |  |
| ORC   | 0.0194 | 0.0212 | 0.0201 | 0.0146 | 0.0103 | 0.0080 | 0.0136 | 0.0063 | 0.0124 | 0.0039 | 0.0048 | 0.0055 | 0.0092 | 0.0046 |        |        |  |
|       | +/-    | +/-    | +/-    | +/-    | +/-    | +/-    | +/-    | +/-    | +/-    | +/-    | +/-    | +/-    | +/-    | +/-    |        |        |  |
|       | 0.0022 | 0.0017 | 0.002  | 0.0012 | 0.0026 | 0.0007 | 0.0027 | 0.0007 | 0.002  | 0.0007 | 0.001  | 0.0005 | 0.0016 | 0.0005 |        |        |  |
| SARD  | 0.0163 | 0.0183 | 0.0166 | 0.0131 | 0.0088 | 0.0072 | 0.0204 | 0.0071 | 0.0133 | 0.0140 | 0.0117 | 0.0132 | 0.0210 | 0.0155 | 0.0162 |        |  |
|       | +/-    | +/-    | +/-    | +/-    | +/-    | +/-    | +/-    | +/-    | +/-    | +/-    | +/-    | +/-    | +/-    | +/-    | +/-    |        |  |
|       | 0.0011 | 0.0001 | 0.0014 | 0.0002 | 0.0011 | 0.0004 | 0.0005 | 0.0011 | 0.0014 | 0.0005 | 0.0007 | 0.0004 | 0.0006 | 0.0008 | 0.0006 |        |  |
| TUSC  | 0.0086 | 0.0102 | 0.0096 | 0.0066 | 0.0005 | 0.0004 | 0.0094 | 0.0023 | 0.0084 | 0.0055 | 0.0032 | 0.0045 | 0.0108 | 0.0061 | 0.0098 | 0.0083 |  |
|       | +/-    | +/-    | +/-    | +/-    | +/-    | +/-    | +/-    | +/-    | +/-    | +/-    | +/-    | +/-    | +/-    | +/-    | +/-    | +/-    |  |
|       | 0.001  | 0.0013 | 0.0005 | 0.0006 | 0.0025 | 0.0001 | 0.0014 | 0.0011 | 0.0007 | 0.001  | 0.0008 | 0.0016 | 0.002  | 0.002  | 0.0025 | 0.0013 |  |

A. Paired Fst values are the mean +/- S.D determined from three non-overlapping sets of 3500 SNPs using the Weir and Cockerham algorithm (see Methods).

B. Population groups included Druze, Bedouin (BDN), Palestinian (PAL), Ashkenazi Jewish American (AJA), Greek (GRK), Italian (ITN), Adygei (ADY), Spanish (SPN), Basque (BAS), IRISH, German (GERM), Eastern European (EEUR), Russian (RUS), Swedish (SWED), Orcadian (ORC), Sardinian (SARD), and Tuscan (TUSC).

**Table S3. Fis values for selected European Population Groups**

| <b>POPULATION GROUP</b> | <b>Fis VALUE<sup>a</sup></b> |
|-------------------------|------------------------------|
| BEDOUIIN                | 0.0379 +/- 0.0010            |
| PALESTINIAN             | 0.0108 +/- 0.0047            |
| ASHKENAZI JEWISH        | 0.0025 +/- 0.0024            |
| GREEK                   | 0.0039 +/- 0.0072            |
| ITALIAN                 | 0.0018 +/- 0.0036            |
| ADYGEI                  | 0.0059 +/- 0.0063            |
| SPANISH                 | 0.0112 +/- 0.0016            |
| BASQUE                  | -0.0014 +/- 0.0023           |
| IRISH                   | 0.0025 +/- 0.0022            |
| GERMAN                  | 0.0062 +/- 0.0021            |
| EAST EUROPEAN AMERICAN  | 0.0104 +/- 0.0028            |
| RUSSIAN                 | 0.0003 +/- 0.0063            |
| SWEDISH                 | 0.0002 +/- 0.0021            |
| ORCADIAN                | -0.0011 +/- 0.0048           |
| SARDINIAN               | 0.0085 +/- 0.0013            |
| TUSCAN                  | 0.0063 +/- 0.0067            |

a. Fis values are the mean +/- S.D determined from three non-overlapping sets of 3500 SNPs using the Weir and Cockerham algorithm (see Methods).
